# Supplementary material for: L-shaped benzimidazole fluorophores: synthesis, characterization and optical response to bases, acids and anions
Source: Royal Society of Chemistry journal article supplement (doi:10.1039/c2cc37120k), 2012-10-18
Supplement: c2cc37120k.pdf [file c2cc37120k.pdf]

**L-shaped benzimidazole fluorophores:  
synthesis, characterization and optical response to bases, acids and anions**

Rio Carlo Lirag, Ha T. M. Le and Ognjen Š. Miljanić\*

University of Houston ▪ Department of Chemistry

136 Fleming Building ▪ Houston, TX 77204-5003 ▪ USA

web: [www.miljanicgroup.com](http://www.miljanicgroup.com) ▪ email: [miljanic@uh.edu](mailto:miljanic@uh.edu) ▪ phone: 832.842.8827

**Supporting Information**

**General Methods**

All reactions were performed under nitrogen atmosphere in oven-dried glassware. Reagents were purchased from commercial suppliers and used without further purification. Solvents were used as received, except *N,N*-dimethylformamide, which was dried over activated alumina in an mBraun Solvent Purification System. Compounds 4-bromo-2,1,3-benzothiadiazole and 3-bromo-1,2-diaminobenzene were synthesized according to literature procedures.<sup>1,2</sup> Diisopropylamine ((*i*-Pr)<sub>2</sub>NH) was distilled over KOH pellets and degassed by a 15 min nitrogen purge prior to use. Microwave-assisted reactions were performed in a Biotage Initiator 2.0 microwave reactor, producing monochromatic microwave radiation with the frequency of 2.45 GHz.

Mass spectral measurements were performed by the Mass Spectrometry Facility of the Department of Chemistry and Biochemistry at the University of Texas at Austin. NMR spectra were obtained on JEOL ECX-400, JEOL ECA-500 and Bruker Avance-800 MHz spectrometers, with working frequencies (for <sup>1</sup>H nuclei) of 400, 500 and 800 MHz, respectively. All <sup>13</sup>C-NMR spectra were recorded with simultaneous decoupling of <sup>1</sup>H nuclei. <sup>1</sup>H-NMR chemical shifts are reported in ppm units relative to the residual signal of the solvent (CDCl<sub>3</sub>: 7.25 ppm, DMSO-*d*<sub>6</sub>: 2.50 ppm, acetone-*d*<sub>6</sub>: 2.05 ppm). NMR spectra were recorded at 25 °C for samples analyzed in CDCl<sub>3</sub> and (CD<sub>3</sub>)<sub>2</sub>CO-*d*<sub>6</sub>, while samples in DMSO-*d*<sub>6</sub> were analyzed at 90 °C with 1–3 drops of D<sub>2</sub>O added to eliminate asymmetry induced by N–H tautomerization.<sup>5</sup> Infrared spectra were recorded on a Perkin-Elmer Spectrum 100 FT-IR spectrophotometer using Pike MIRacle Micrometer pressure clamp. Microanalyses were conducted by Intertek USA, Inc. Melting points were measured in open capillary tubes using Mel-Temp Thermo Scientific apparatus, and are uncorrected.

Column chromatography was carried out on silica gel 60, 32–63 mesh. Analytical TLC was performed on Merck aluminum-backed silica gel plates.

*Experiments are presented in the order that follows the discussion of the manuscript.*

*Compound numbers are identical to those in the main text of the manuscript.*

## Syntheses

### Synthesis of 4-bromo-2,1,3-benzothiadiazole<sup>1</sup>

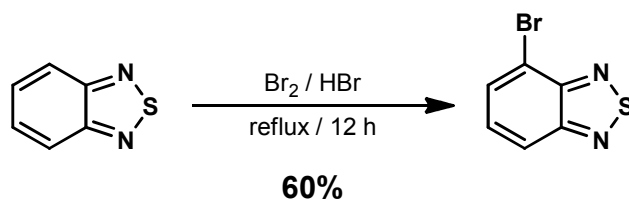

In an oven-dried 250 mL 2-neck flask, compound 2,1,3-benzothiadiazole (13.6 g, 0.10 mol) was suspended in 47% aqueous solution of HBr (100 mL). The mixture was heated until boiling, and then Br<sub>2</sub> (4.70 mL, 0.09 mol) was added dropwise. The mixture was heated at reflux overnight. The product was purified by steam distillation, followed by recrystallization from EtOH, to ultimately yield white needle-like crystals in the yield of 13.0 g (60%).

**4-Bromo-2,1,3-benzothiadiazole:** white needle-like crystals: <sup>1</sup>H-NMR (CDCl<sub>3</sub>, 500 MHz): δ 7.97 (dd, <sup>3</sup>J<sub>H-H</sub> = 7.8 Hz, <sup>4</sup>J<sub>H-H</sub> = 1.2 Hz, 1H), 7.84 (dd, <sup>3</sup>J<sub>H-H</sub> = 6.9 Hz, <sup>4</sup>J<sub>H-H</sub> = 1.2 Hz, 1H), 7.48 (dd, <sup>3</sup>J<sub>H-H</sub> = 6.9 Hz, <sup>3</sup>J<sub>H-H</sub> = 7.5 Hz, 1H) ppm. This data agrees with a previous literature report.<sup>3</sup>

### Synthesis of 3-bromo-1,2-diaminobenzene (**1**)

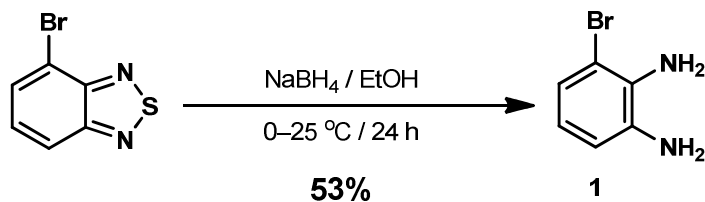

Compound **1** was synthesized using a modified method of Peng et al.<sup>2</sup> In an oven-dried 1 L Schlenk flask, 4-bromo-2,1,3-benzothiadiazole (6.63 g, 31.0 mmol) was suspended in 300 mL of absolute EtOH. Sodium borohydride (23.3 g, 61.6 mmol) was then added in several portions and the solution was kept at 0 °C until vigorous boiling of the solvent subsided, during which time the mixture gradually turned orange. Absolute EtOH was added occasionally to ensure that the mixture can be stirred. After 24 h, the orange solution was evaporated in vacuo, and the resulting solid was dissolved in deionized H<sub>2</sub>O (300 mL) and then extracted with Et<sub>2</sub>O. The Et<sub>2</sub>O extract was washed with brine and dried over MgSO<sub>4</sub>. Column chromatography on silica gel, using a mixture of hexanes and EtOAc (1:1) as the eluent, afforded pure compound **1** as orange oil (3.05 g, 53%).

**1:** orange oil. <sup>1</sup>H-NMR (DMSO-*d*<sub>6</sub>, 400 MHz): δ 6.61 (dd, <sup>3</sup>J<sub>H-H</sub> = 7.8 Hz, <sup>4</sup>J<sub>H-H</sub> = 1.4 Hz, 1H), 6.46 (dd, <sup>3</sup>J<sub>H-H</sub> = 7.8 Hz, <sup>4</sup>J<sub>H-H</sub> = 1.4 Hz, 1H), 6.29 (t, <sup>3</sup>J<sub>H-H</sub> = 7.8 Hz, 1H), 4.80 (s, 2H), 4.56 (s, 2H) ppm. This data agrees with previous literature reports.<sup>3,4</sup>

### Synthesis of 7-bromo-2-phenyl-1*H*-benzo[*d*]imidazole (**2**)

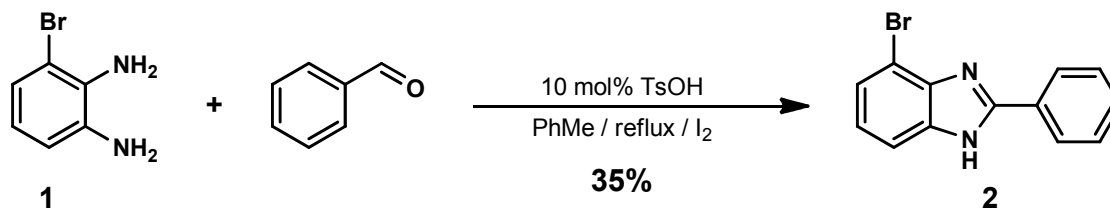

In a 250 mL round bottom flask, 3-bromo-1,2-phenylenediamine (**1**, 2.12 g, 11.4 mmol) and benzaldehyde (1.16 mL, 11.4 mmol) were dissolved in PhMe (150 mL). *para*-Toluenesulfonic acid (0.22 g, 1.17 mmol) was added and the solution was sonicated for 20 min. After sonication, the solution was heated at reflux with a Dean-Stark trap for 12 h. After that time, I<sub>2</sub> (2.90 g, 11.4 mmol) was added, and the solution was kept at reflux for 24 h. After cooling, the solvent was removed and the brown oily residue was sonicated with CH<sub>2</sub>Cl<sub>2</sub> until it formed a solid precipitate. The solution was filtered and washed with hexane to give compound **2** as a yellow solid (1.11 g, 35%).

**2**: yellow powder, mp: 225–227 °C. IR (neat): 3061 (w,  $\tilde{\nu}_{\text{N-H}}$ ), 1621 (s,  $\tilde{\nu}_{\text{C=N}}$ ), 1457 (s), 1311 (s), 1029 (s), 931 (s), 750 (s), 690 (s,  $\tilde{\nu}_{\text{C-Br}}$ ) cm<sup>-1</sup>. UV-Vis (CH<sub>3</sub>CN):  $\lambda_{\text{max}}$  (log  $\epsilon$ ) = 206 (4.71), 242 (4.36), 248 (4.30), 300 (4.46) nm. <sup>1</sup>H-NMR ((CD<sub>3</sub>)<sub>2</sub>CO-*d*<sub>6</sub>, 500 MHz):  $\delta$  8.24 (dd, <sup>3</sup>*J*<sub>H-H</sub> = 8.30 Hz, <sup>4</sup>*J*<sub>H-H</sub> = 1.45 Hz, 2H), 7.55 (d, <sup>3</sup>*J*<sub>H-H</sub> = 8.0 Hz, 1H), 7.50 (m, 3H), 7.39 (dd, <sup>3</sup>*J*<sub>H-H</sub> = 8.0 Hz, <sup>4</sup>*J*<sub>H-H</sub> = 1.15 Hz, 1H), 7.12 (dd, <sup>3</sup>*J*<sub>H-H</sub> = 8.0, <sup>3</sup>*J*<sub>H-H</sub> = 7.45 Hz, 1H) ppm. <sup>13</sup>C-NMR ((CD<sub>3</sub>)<sub>2</sub>CO-*d*<sub>6</sub>, 125 MHz):  $\delta$  152.7, 143.8, 136.3, 130.8, 130.4, 129.2, 125.5, 124.0, 113.2, 111.0 ppm. HRMS (ESI): Calcd for C<sub>13</sub>H<sub>10</sub>BrN<sub>2</sub><sup>+</sup>: 273.0022. Found: 273.0020.

### Synthesis of 4-(7-bromo-1*H*-benzo[*d*]imidazol-2-yl)-*N,N*-dimethylbenzenamine (**3**)

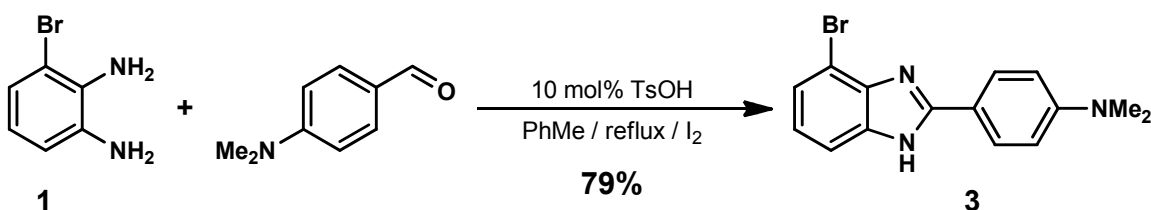

Compound **1** (1.12 g, 6.00 mmol) and 4-dimethylaminobenzaldehyde (895 mg, 6.00 mmol) were dissolved in PhMe (150 mL). *para*-Toluenesulfonic acid (196 mg, 1.03 mmol) was added, and the solution was sonicated for 20 min, during which time a precipitate formed. After sonication, the solution was heated at reflux with a Dean-Stark trap for 12 h. After that time, I<sub>2</sub> (1.52 g, 6mmol) was added and the solution was heated at reflux for 24 h. After cooling, the solution was filtered and the residue washed with hexane and Me<sub>2</sub>CO to give a reddish brown solid that was identified as **3** (1.50 g, 79%). Further purification can be achieved by recrystallization in Me<sub>2</sub>CO or EtOH.

**3**: red-brown powder, mp 161 °C (dec). IR (neat): 3432 (m,  $\tilde{\nu}_{\text{N-H}}$ ), 1610 (s,  $\tilde{\nu}_{\text{C=N}}$ ), 1524 (s), 1378 (s), 1216 (s), 816 (s), 776 (s), 641 (s,  $\tilde{\nu}_{\text{C-Br}}$ )  $\text{cm}^{-1}$ . UV-Vis ( $\text{CH}_3\text{CN}$ ):  $\lambda_{\text{max}}$  ( $\log \epsilon$ ) = 245 (4.46), 371 (4.64) nm.  $^1\text{H-NMR}$  ( $\text{DMSO-}d_6$ , 500 MHz):  $\delta$  8.08 (d,  $^3J_{\text{H-H}} = 9.2$  Hz, 2H), 7.65 (d,  $^3J_{\text{H-H}} = 8.0$  Hz, 1H), 7.63 (d,  $^3J_{\text{H-H}} = 8.0$  Hz, 1H), 7.32 (t,  $^3J_{\text{H-H}} = 8.0$  Hz, 1H), 6.89 (d,  $^3J_{\text{H-H}} = 9.2$  Hz, 2H), 3.05 (s, 6H) ppm.  $^{13}\text{C-NMR}$  ( $\text{DMSO-}d_6$ , 125 MHz):  $\delta$  153.8, 151.9, 133.4, 132.7, 130.4, 128.4, 126.9, 112.9, 112.2, 108.7, 105.7 ppm. HRMS (ESI): Calcd for  $\text{C}_{15}\text{H}_{15}\text{BrN}_3^+$ : 316.0444. Found: 316.0443.

#### Synthesis of 7-bromo-2-(pyridine-4-yl)-1H-benzo[d]imidazole (**4**)

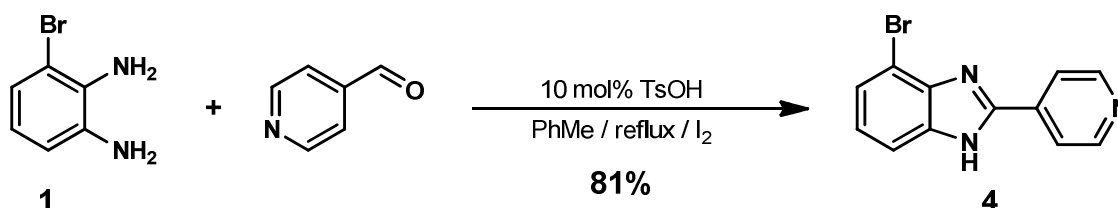

In a 250 mL round-bottom flask, 3-bromo-1,2-phenylenediamine (2.51 g, 13.4 mmol) and 4-pyridinecarboxaldehyde (1.26 mL, 13.4 mmol) were dissolved in PhMe (150 mL). *para*-Toluenesulfonic acid (255 mg, 1.34 mmol) was added and the solution was sonicated for 20 min. After sonication, the solution was heated at reflux with a Dean-Stark trap for 12 h. After that time, I<sub>2</sub> (3.40 g, 13.4 mmol) was added into the solution. Immediate formation of a yellow-brown precipitate was observed. The mixture was kept at reflux for additional 24 h. After cooling, the solution was filtered and the residue washed with hexane and Me<sub>2</sub>CO and to give a pale yellow solid (2.98 g, 81%). Further purification can be achieved by recrystallization from Me<sub>2</sub>CO or EtOH.

**4**: pale yellow powder, mp 243 °C (dec). IR (neat): 3071 (w,  $\tilde{\nu}_{\text{N-H}}$ ), 1638 (s,  $\tilde{\nu}_{\text{C=N}}$ ), 1503 (s), 1224 (s), 1151 (s), 1032 (s), 808 (s), 743 (s), 683 (s,  $\tilde{\nu}_{\text{C-Br}}$ )  $\text{cm}^{-1}$ . UV-Vis ( $\text{CH}_3\text{CN}$ ):  $\lambda_{\text{max}}$  ( $\log \epsilon$ ) = 202 (4.59), 245 (4.20), 313 (3.95), 350 (3.95) nm.  $^1\text{H-NMR}$  ( $\text{DMSO-}d_6$ , 500 MHz):  $\delta$  8.96 (d,  $^3J_{\text{H-H}} = 6.3$  Hz, 2H), 8.50 (d,  $^3J_{\text{H-H}} = 6.9$  Hz, 2H), 7.68 (d,  $^3J_{\text{H-H}} = 8.0$  Hz, 1H), 7.54 (d,  $^3J_{\text{H-H}} = 7.5$  Hz, 1H), 7.26 (dd,  $^3J_{\text{H-H}} = 8.0, 7.5$  Hz, 1H) ppm.  $^{13}\text{C-NMR}$  ( $\text{DMSO-}d_6$ , 125 MHz):  $\delta$  147.4, 144.2, 141.2, 138.3, 127.0, 126.4, 123.6, 114.4, 111.5 ppm. HRMS (ESI): Calcd for  $\text{C}_{12}\text{H}_9\text{BrN}_3^+$ : 273.9974. Found: 273.9974.

### Synthesis of compound **5**

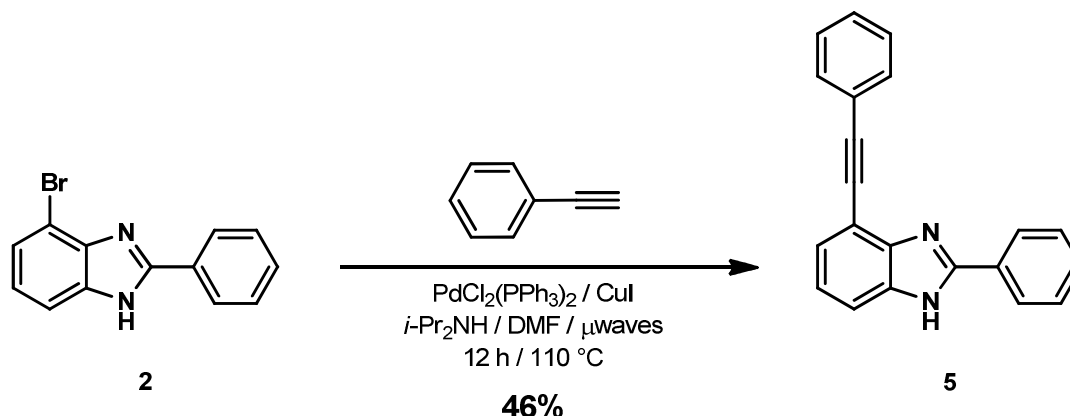

Phenylacetylene (450 mg, 4.40 mmol) was added to a thick-walled microwave pressure vial that contained a mixture of compound **2** (300 mg, 1.10 mmol),  $\text{PdCl}_2(\text{PPh}_3)_2$  (60.0 mg, 0.09 mmol),  $\text{CuI}$  (20.0 mg, 0.11 mmol),  $i\text{-Pr}_2\text{NH}$  (5 mL), and  $\text{DMF}$  (5 mL). The vial was sealed and exposed to microwave irradiation for 12 h at  $110^\circ\text{C}$ . After cooling, the reaction mixture was extracted with  $\text{EtOAc}$ , washed with brine, and then dried over anhydrous  $\text{MgSO}_4$ . The product was isolated by column chromatography, eluting with a hexane/ $\text{EtOAc}$  (7:3) mixture. The solvent was removed under reduced pressure, and the solid recrystallized from a mixture of THF and hexane, to give compound **5** (150 mg, 46%) as a white powder (mp  $280^\circ\text{C}$ ).

**5**: UV-Vis (THF):  $\lambda_{\text{max}}$  ( $\log \epsilon$ ) = 213 (4.67), 233 (4.51), 247 (4.47), 261 (4.43), 272 (4.43), 283 (4.41), 318 (4.60) nm. IR (neat): 3052 (w,  $\tilde{\nu}_{\text{N-H}}$ ), 2324 (w,  $\tilde{\nu}_{\text{C}\equiv\text{C}}$ ), 1473 (m,  $\tilde{\nu}_{\text{C}=\text{N}}$ ), 1459 (m), 1418 (m), 1395 (m), 1253 (m), 965 (w), 973 (m), 753 (s), 707 (s), 691 (s)  $\text{cm}^{-1}$ .  $^1\text{H-NMR}$  ( $(\text{CD}_3)_2\text{SO}$  and 1 drop of  $\text{D}_2\text{O}$ , 500 MHz):  $\delta$  8.22 (br d, 2H), 7.64 (br d, 2H), 7.54 (m, 3H), 7.49 (m, 1H), 7.43 (m, 3H), 7.37 (d,  $^3J_{\text{H-H}} = 7.5$  Hz, 1H), 7.21 (dd,  $^3J_{\text{H-H}} = 8.0$  Hz; 7.5 Hz, 1H) ppm.  $^{13}\text{C-NMR}$  ( $(\text{CD}_3)_2\text{SO}$  and 1 drop of  $\text{D}_2\text{O}$ , 200 MHz):  $\delta$  152.0, 144.4, 135.1, 131.6, 130.4, 129.8, 129.1, 128.9, 127.4, 126.8, 125.8, 122.9, 122.7, 112.9, 112.4, 109.6, 92.7, 87.7 ppm. HRMS (ESI/[ $\text{M}+\text{H}$ ] $^+$ ): calcd for  $\text{C}_{21}\text{H}_{15}\text{N}_2^+$  295.1230, found 295.1230. Anal. Calcd. for  $\text{C}_{21}\text{H}_{14}\text{N}_2 \cdot \frac{1}{4}\text{THF}$ : C, 84.59; H, 5.16; N, 8.97. Found: C, 84.84; H, 3.95; N, 9.29.

## Synthesis of Compound 6

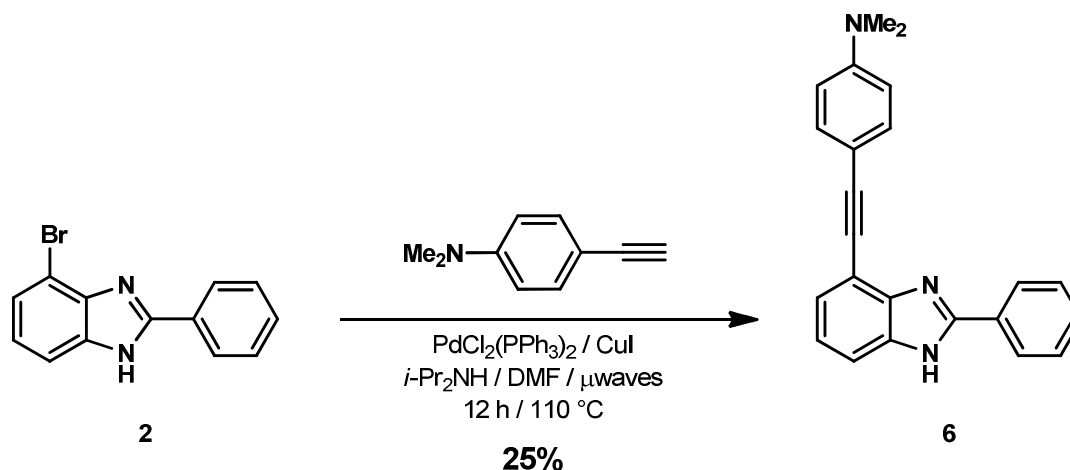

Anhydrous  $K_2CO_3$  (831 mg, 6.01 mmol) was added to a solution of 2-(4-(*N,N*-dimethylamino)phenyl)trimethylsilylethyne (652 mg, 3.00 mmol) in a mixture of MeOH (5 mL) and THF (5 mL). After stirring for 30 min under nitrogen, the reaction mixture was filtered through Celite. The solvent was removed under reduced pressure to yield crude 4-ethynyl-*N,N*-dimethylaniline, which was used without purification in the next step. To minimize manipulations of this somewhat sensitive compound, we assumed a 95% yield for this reaction.<sup>6</sup>

The entire amount of 4-ethynyl-*N,N*-dimethylaniline (prepared as above-described) was added to a thick-walled microwave pressure vial that contained a mixture of compound **2** (300 mg, 1.10 mmol),  $PdCl_2(PPh_3)_2$  (60.0 mg, 0.09 mmol), CuI (20.0 mg, 0.11 mmol), *i*-Pr<sub>2</sub>NH (5 mL), and DMF (5 mL). The vial was sealed and exposed to microwave irradiation for 12 h at 110 °C. After cooling, the reaction mixture was extracted with EtOAc, washed with brine, and dried over anhydrous  $MgSO_4$ . The product was isolated by column chromatography, eluting with hexane/EtOAc mixtures (60:40, 50:50, 20:80 and 0:100, successively). The solvent was removed under reduced pressure, and the solid was washed with EtOAc (5 mL) and THF (3 mL) to give compound **6** (90.5 mg, 25%) as a light green powder (mp 284 °C, with decomposition).

**6**: UV-Vis (THF):  $\lambda_{max}$  (log  $\epsilon$ ) = 253 (4.45), 293 (4.59), 317 (4.65), 351 (4.53) nm. IR (neat): 3091 (w,  $\tilde{\nu}_{N-H}$ ), 2206 (w,  $\tilde{\nu}_{C\equiv C}$ ), 1607 (s,  $\tilde{\nu}_{C=N}$ ), 1588 (m), 1524 (m), 1457 (m), 1386 (m), 1363 (m), 1186 (m), 819 (s), 747 (s), 707 (s)  $cm^{-1}$ . <sup>1</sup>H-NMR ((CD<sub>3</sub>)<sub>2</sub>SO and 1 drop of D<sub>2</sub>O, 500 MHz):  $\delta$  8.22 (br d, 2H), 7.51 (m, 5H), 7.41 (br s, 1H), 7.30 (d, <sup>3</sup> $J_{H-H}$  = 7.5 Hz, 1H), 7.18 (dd, <sup>3</sup> $J_{H-H}$  = 8.1 Hz, <sup>3</sup> $J_{H-H}$  = 7.4 Hz, 1H), 6.73 (d, <sup>3</sup> $J_{H-H}$  = 9.2 Hz, 2H), 2.94 (s, 6H) ppm. <sup>13</sup>C-NMR ((CD<sub>3</sub>)<sub>2</sub>SO and 1 drop of D<sub>2</sub>O, 200 MHz):  $\delta$  151.6, 150.1, 144.1, 135.1, 132.5, 130.1, 129.9, 128.9, 126.7, 125.2, 122.5, 113.9, 111.9, 111.4, 109.1, 94.2, 85.4, 39.5 ppm. HRMS (ESI/[M+H]<sup>+</sup>): calcd for C<sub>23</sub>H<sub>20</sub>N<sub>3</sub><sup>+</sup> 338.1652, found 338.1650. Anal. Calcd. for C<sub>23</sub>H<sub>19</sub>N<sub>3</sub>· $\frac{1}{3}$ THF: C, 80.86; H, 6.04; N, 11.63. Found: C, 80.48; H, 5.46; N, 12.05.

### Synthesis of compound 7

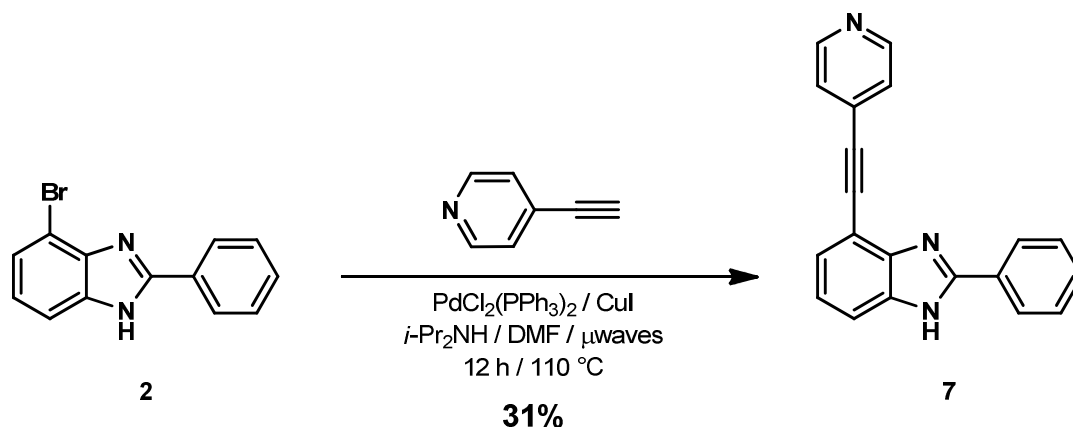

Anhydrous  $\text{K}_2\text{CO}_3$  (1.00 g, 7.24 mmol) was added to a solution of 2-(4-(pyridyl)) trimethylsilylacetylene (630 mg, 3.59 mmol) in a mixture of MeOH (5 mL) and THF (5 mL). After being stirred for 30 min under nitrogen, the reaction mixture was filtered through Celite. The solvent was removed under reduced pressure to yield crude 4-ethynylpyridine, which was used without purification in the next step. To minimize manipulations of this somewhat sensitive compound, we assumed a 95% yield for this reaction.<sup>6</sup>

The entire amount of 4-ethynylpyridine (prepared as described above) was added to a thick-walled microwave pressure vial that contained a mixture of compound **2** (300 mg, 1.10 mmol),  $\text{PdCl}_2(\text{PPh}_3)_2$  (60.0 mg, 0.09 mmol), CuI (20.0 mg, 0.11 mmol), *i*-Pr<sub>2</sub>NH (5 mL), and DMF (5 mL). The vial was sealed and exposed to microwave irradiation for 12 h at 110 °C. After cooling, the reaction mixture was extracted with EtOAc, washed with brine, and dried over anhydrous  $\text{MgSO}_4$ . The product was isolated by column chromatography, eluting first with pure EtOAc, and then successively with EtOAc/MeOH mixtures in 95:5 and 90:10 ratios. The solvent was removed under reduced pressure, and the resulting solid was recrystallized from a mixture of THF and hexane to give 102 mg (31%) of compound **7** as a white powder (mp 251 °C, with decomposition).

**7**: UV-Vis (THF):  $\lambda_{\text{max}}$  (log  $\epsilon$ ) = 210 (4.66), 235 (4.48), 242 (4.48), 247 (4.46), 259 (4.34), 274 (4.30), 287 (4.36), 322 (4.57) nm. IR (neat): 3085 (w,  $\tilde{\nu}_{\text{N-H}}$ ), 2224 (w,  $\tilde{\nu}_{\text{C=C}}$ ), 1598 (m,  $\tilde{\nu}_{\text{C=N}}$ ), 1456 (m), 1415 (m), 1270 (w), 831 (m), 793 (w), 735 (s), 697 (s), 685 (s), 648 (m)  $\text{cm}^{-1}$ . <sup>1</sup>H-NMR (( $\text{CD}_3$ )<sub>2</sub>SO, 500 MHz):  $\delta$  12.86 (s, 1H), 8.63 (d, <sup>3</sup> $J_{\text{H-H}}$  = 6.3 Hz, 2H), 8.22 (d, <sup>3</sup> $J_{\text{H-H}}$  = 7.5 Hz, 2H), 7.65 (d, <sup>3</sup> $J_{\text{H-H}}$  = 7.5 Hz, 1H), 7.53 (m, 5H), 7.43 (dd, <sup>3</sup> $J_{\text{H-H}}$  = 7.5 Hz, <sup>4</sup> $J_{\text{H-H}}$  = 1.2 Hz, 1H), 7.24 (dd, <sup>3</sup> $J_{\text{H-H}}$  = 8.1 Hz, <sup>3</sup> $J_{\text{H-H}}$  = 7.5 Hz, 1H) ppm. <sup>13</sup>C-NMR (( $\text{CD}_3$ )<sub>2</sub>SO and 1 drop of D<sub>2</sub>O, 200 MHz):  $\delta$  152.5, 150.2, 144.5, 135.2, 131.0, 130.8, 129.7, 129.2, 127.1, 126.5, 125.7, 122.8, 113.4, 111.7, 109.6, 92.2, 90.2 ppm. HRMS (ESI/[M+H]<sup>+</sup>): calcd for  $\text{C}_{20}\text{H}_{14}\text{N}_3^+$  296.1182, found 296.1183. Anal. Calcd for  $\text{C}_{20}\text{H}_{13}\text{N}_3 \cdot 1/6\text{THF}$ : C, 80.76; H, 4.70; N, 13.67. Found: C, 80.76; H, 4.31; N, 13.88.

### Synthesis of compound **8**

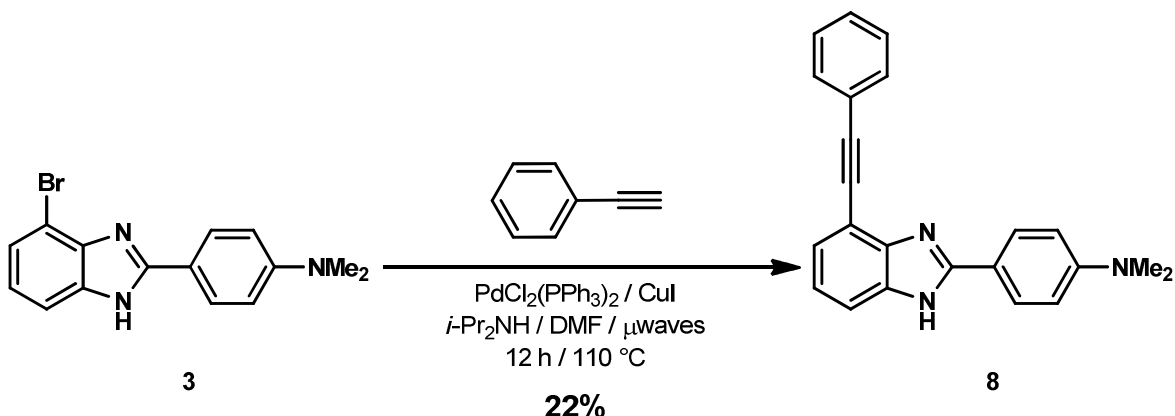

Phenylacetylene (387 mg, 3.79 mmol) was added to a thick-walled microwave pressure vial that contained a mixture of compound **3** (300 mg, 0.95 mmol), PdCl<sub>2</sub>(PPh<sub>3</sub>)<sub>2</sub> (60.0 mg, 0.09 mmol), CuI (20.0 mg, 0.11 mmol), *i*-Pr<sub>2</sub>NH (5 mL), and DMF (5 mL). The vial was sealed and exposed to microwave irradiation for 12 h at 110 °C. After cooling, the reaction mixture was extracted with EtOAc, washed with brine, and dried over anhydrous MgSO<sub>4</sub>. The product was isolated by column chromatography, eluting with a hexane/EtOAc (70:30) mixture. The solvent was removed under reduced pressure, and the solid was recrystallized from a mixture of Et<sub>2</sub>O, CH<sub>2</sub>Cl<sub>2</sub>, and hexane to give 70 mg (22%) of compound **8** as a yellow powder (mp 247 °C).

**8**: UV-Vis (THF):  $\lambda_{\text{max}}$  (log  $\epsilon$ ) = 224 (4.59), 299 (4.48), 312 (4.45), 323 (4.46), 352 (4.57) nm. IR (neat): 3119 (w,  $\tilde{\nu}_{\text{N-H}}$ ), 2320 (w,  $\tilde{\nu}_{\text{C=C}}$ ), 1612 (s,  $\tilde{\nu}_{\text{C=N}}$ ), 1492 (m), 1416 (m), 1367 (m), 1202 (m), 956 (w), 820 (m), 753 (s), 689 (m), 668 (m), 636 (m), 601 (m) cm<sup>-1</sup>. <sup>1</sup>H-NMR (CDCl<sub>3</sub>, 400 MHz):  $\delta$  7.96 (d, <sup>3</sup> $J_{\text{H-H}}$  = 8.7 Hz, 2H), 7.68 (d, <sup>3</sup> $J_{\text{H-H}}$  = 8.2 Hz, 1H), 7.58 (m, 2H), 7.40 (m, 4H), 7.20 (dd, <sup>3</sup> $J_{\text{H-H}}$  = 8.2 Hz, <sup>3</sup> $J_{\text{H-H}}$  = 7.8 Hz, 1H), 6.74 (d, <sup>3</sup> $J_{\text{H-H}}$  = 8.3 Hz, 2H), 3.03 (s, 6H) ppm. <sup>13</sup>C-NMR (CDCl<sub>3</sub>, 200 MHz):  $\delta$  162.2, 153.0, 151.8, 143.5, 131.8, 131.7, 128.5, 128.3, 126.2, 123.1, 122.5, 121.6, 116.0, 112.0, 93.5, 85.6, 40.2 ppm. HRMS (ESI): calcd for C<sub>23</sub>H<sub>20</sub>N<sub>3</sub><sup>+</sup> 338.1652, found 338.1654. Anal. Calcd for C<sub>23</sub>H<sub>19</sub>N<sub>3</sub>·<sup>1</sup>/<sub>4</sub>Et<sub>2</sub>O: C, 80.98; H, 6.09; N, 11.81. Found: C, 80.93; H, 5.48; N, 12.23.



### Synthesis of compound **9**

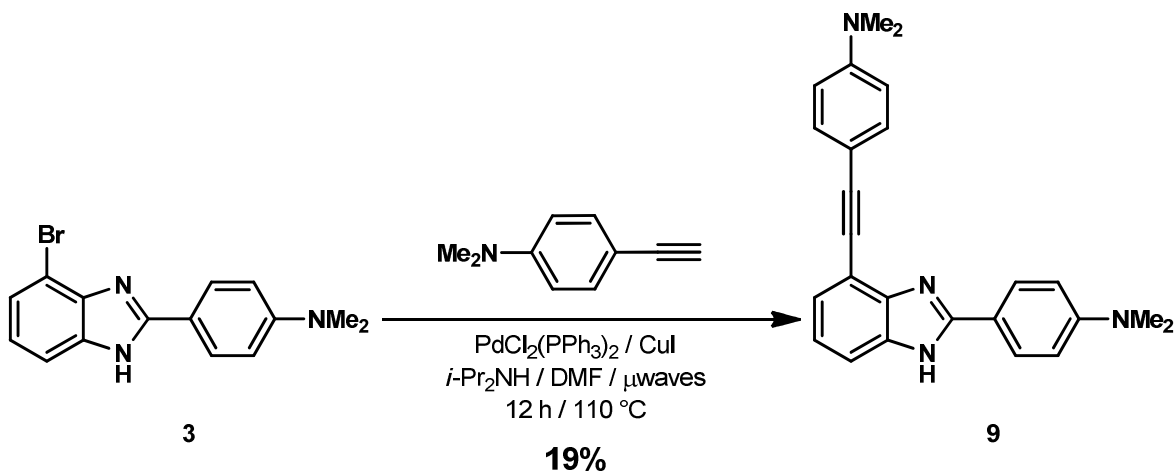

The entire amount of 4-ethynyl-*N,N*-dimethylaniline (prepared as in the synthesis compound **6** described above) was added to a thick-walled microwave pressure vial that contained a mixture of compound **3** (300 mg, 0.95 mmol), PdCl<sub>2</sub>(PPh<sub>3</sub>)<sub>2</sub> (60.0 mg, 0.09 mmol), CuI (20.0 mg, 0.11 mmol), *i*-Pr<sub>2</sub>NH (5 mL), and DMF (5 mL). The vial was sealed and exposed to microwave irradiation for 12 h at 110 °C. After cooling, the reaction mixture was extracted with EtOAc, washed with brine, and dried over anhydrous MgSO<sub>4</sub>. The product was isolated by column chromatography, eluting with pure EtOAc. The solvent was removed under reduced pressure, and the solid was recrystallized from a mixture of THF and hexane to give 67 mg (19%) of compound **9** as a yellow powder (mp 276 °C, with decomposition).

**9**: UV-Vis (THF):  $\lambda_{\text{max}}$  (log  $\epsilon$ ) = 220 (4.60), 292 (4.46), 339 (4.66), 353 (4.62) nm. IR (neat): 3046 (w,  $\tilde{\nu}_{\text{N-H}}$ ), 2209 (w,  $\tilde{\nu}_{\text{C}\equiv\text{C}}$ ), 1609 (s,  $\tilde{\nu}_{\text{C}=\text{N}}$ ), 1517 (m), 1482 (m), 1443 (m), 1415 (m), 1366 (m), 1247 (m), 1183 (m), 920 (m), 821 (s), 755 (s) cm<sup>-1</sup>. <sup>1</sup>H-NMR ((CD<sub>3</sub>)<sub>2</sub>SO and 3 drops of D<sub>2</sub>O, 500 MHz):  $\delta$  8.00 (d, <sup>3</sup>*J*<sub>H-H</sub> = 8.1 Hz, 2H), 7.42 (m, 3H), 7.20 (d, <sup>3</sup>*J*<sub>H-H</sub> = 7.5 Hz, 1H), 7.09 (dd, <sup>3</sup>*J*<sub>H-H</sub> = 8.1 Hz; 7.5 Hz, 1H), 6.79 (d, <sup>3</sup>*J*<sub>H-H</sub> = 9.2 Hz, 2H), 6.71 (d, <sup>3</sup>*J*<sub>H-H</sub> = 8.6 Hz, 2H), 2.96 (s, 6H), 2.92 (s, 6H) ppm. <sup>13</sup>C-NMR ((CD<sub>3</sub>)<sub>2</sub>SO and 1 drop of D<sub>2</sub>O, 200 MHz):  $\delta$  152.6, 151.4, 150.1, 144.4, 135.0, 132.5, 127.9, 124.7, 121.5, 118.1, 117.0, 113.0, 111.8, 110.7, 109.4, 106.6, 93.8, 85.8, 39.5 ppm. HRMS (ESI/[M+H]<sup>+</sup>): calcd for C<sub>25</sub>H<sub>25</sub>N<sub>4</sub><sup>+</sup> 381.2074, found 381.2073. Anal. Calcd for C<sub>25</sub>H<sub>24</sub>N<sub>4</sub>·½THF: C, 77.85; H, 6.78; N, 13.45. Found: C, 77.45; H, 6.00; N, 13.96.

### Synthesis of compound **10**

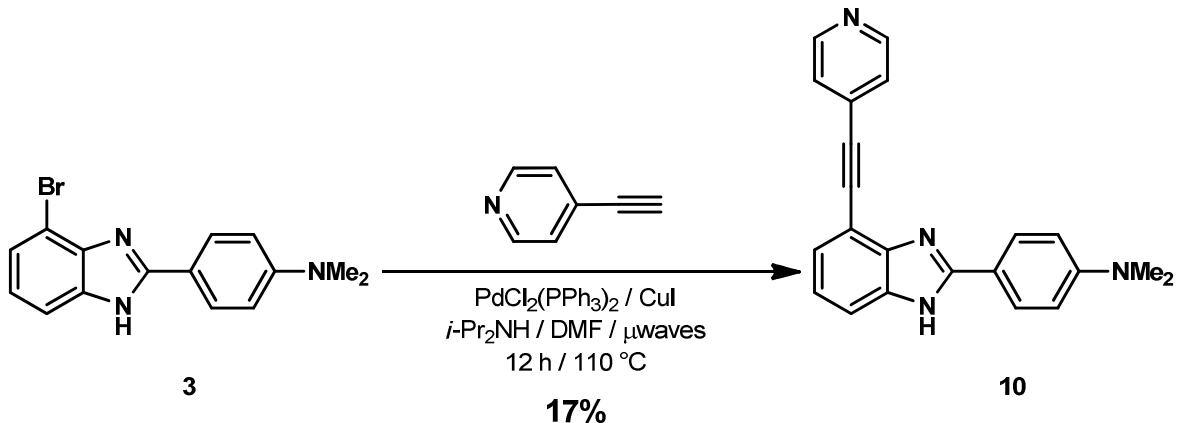

The entire amount of 4-ethynylpyridine (prepared as in the synthesis of compound **7** described above) was added to a thick-walled microwave pressure vial that contained a mixture of compound **3** (300 mg, 0.95 mmol), PdCl<sub>2</sub>(PPh<sub>3</sub>)<sub>2</sub> (60.0 mg, 0.09 mmol), CuI (20.0 mg, 0.11 mmol), *i*-Pr<sub>2</sub>NH (5 mL), and DMF (5 mL). The vial was sealed and exposed to microwave irradiation for 12 h at 110 °C. After cooling, the reaction mixture was extracted with EtOAc, washed with brine, and dried over anhydrous MgSO<sub>4</sub>. The product was isolated by column chromatography, eluting with pure EtOAc. The solvent was removed under reduced pressure, and the solid was recrystallized from a mixture of THF and hexane to give 55 mg (17%) of compound **10** as a yellow powder (mp 256 °C).

**10**: UV-Vis (THF):  $\lambda_{\max}$  (log  $\epsilon$ ) = 222 (4.65), 306 (4.56), 314 (4.56), 326 (4.53), 359 (4.53) nm. IR (neat): 3419 (s,  $\tilde{\nu}_{\text{N-H}}$ ), 2227 (w,  $\tilde{\nu}_{\text{C=C}}$ ), 1609 (s,  $\tilde{\nu}_{\text{C=N}}$ ), 1500 (m), 1413 (m), 1365 (m), 1352 (m), 1205 (m), 790 (m), 739 (s), 688 (m), 608 (m) cm<sup>-1</sup>. <sup>1</sup>H-NMR ((CD<sub>3</sub>)<sub>2</sub>SO and 1 drop of D<sub>2</sub>O, 500 MHz):  $\delta$  8.62 (d, <sup>3</sup> $J_{\text{H-H}}$  = 5.2 Hz, 2H), 8.02 (br s, 2H), 7.58 (br s, 3H), 7.35 (dd, <sup>3</sup> $J_{\text{H-H}}$  = 8.0 Hz; <sup>4</sup> $J_{\text{H-H}}$  = 1.2 Hz, 1H), 7.16 (dd, <sup>3</sup> $J_{\text{H-H}}$  = 8.1 Hz, <sup>3</sup> $J_{\text{H-H}}$  = 7.5 Hz, 1H), 6.81 (d, <sup>3</sup> $J_{\text{H-H}}$  = 9.2 Hz, 2H), 2.97 (s, 6H) ppm. <sup>13</sup>C-NMR ((CD<sub>3</sub>)<sub>2</sub>SO and 1 drop of D<sub>2</sub>O, 200 MHz):  $\delta$  153.5, 151.7, 150.0, 145.0, 135.1, 131.0, 128.2, 125.7, 125.5, 121.7, 116.6, 111.9, 111.5, 110.5, 92.5, 89.9, 39.5 ppm. HRMS (ESI/[M+H]<sup>+</sup>): calcd for C<sub>22</sub>H<sub>19</sub>N<sub>4</sub><sup>+</sup> 339.1604, found 339.1606. Anal. Calcd. for C<sub>22</sub>H<sub>18</sub>N<sub>4</sub>·1/6 THF C, 77.69; H, 5.56; N, 15.99. Found: C, 77.24; H, 5.09; N, 13.34.

### Synthesis of compound **11**

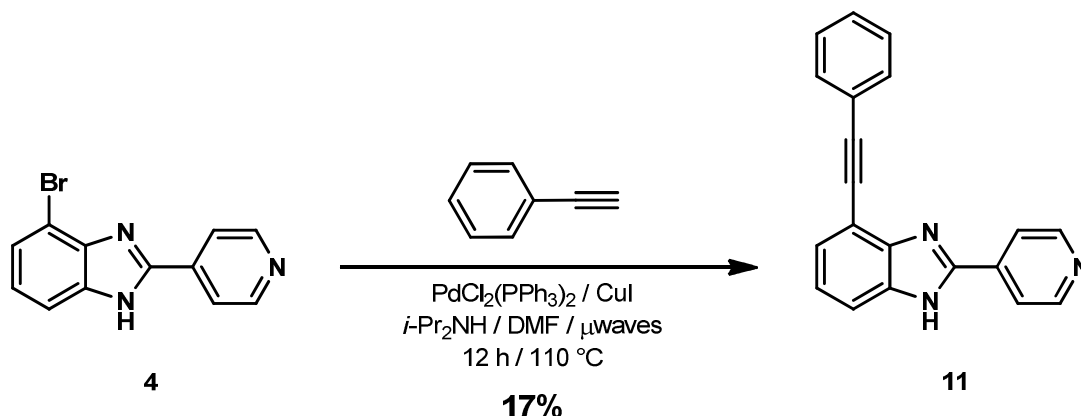

Phenylacetylene (418 mg, 4.09 mmol) was added to a thick-walled microwave pressure vial that contained a mixture of compound **4** (300 mg, 1.09 mmol), PdCl<sub>2</sub>(PPh<sub>3</sub>)<sub>2</sub> (60.0 mg, 0.09 mmol), CuI (20.0 mg, 0.11 mmol), *i*-Pr<sub>2</sub>NH (5 mL), and DMF (5 mL). The vial was sealed and exposed to microwave irradiation for 12 h at 110 °C. After cooling, the reaction mixture was extracted with EtOAc, washed with brine, and dried over anhydrous MgSO<sub>4</sub>. The product was isolated by column chromatography, eluting first with pure EtOAc, and then successively with EtOAc/MeOH mixtures in 95:5 and 90:10 ratios. The solvent was removed under reduced pressure, and the solid was recrystallized in the mixture of THF, CH<sub>2</sub>Cl<sub>2</sub> and hexane to give 58 mg (17%) of compound **11** as a white powder (mp 226 °C).

**11**: UV-Vis (THF):  $\lambda_{\text{max}}$  (log  $\epsilon$ ) = 227 (4.45), 264 (4.46), 281 (4.36), 288 (4.34), 323 (4.46) nm. IR (neat): 3076 (w,  $\tilde{\nu}_{\text{C-H}}$ ), 1609 (m,  $\tilde{\nu}_{\text{C=N}}$ ), 1437 (m), 1250 (m), 999 (m), 829 (m), 756 (s), 736 (m), 696 (m), 630 (m) cm<sup>-1</sup>. <sup>1</sup>H-NMR ((CD<sub>3</sub>)<sub>2</sub>SO, 500 MHz):  $\delta$  13.14 (br s, 1H), 8.74 (d, <sup>3</sup>*J*<sub>H-H</sub> = 6.3 Hz, 2H), 8.13 (br s, 2H), 7.63 (br s, 3H), 7.43 (m, 4H), 7.28 (dd, <sup>3</sup>*J*<sub>H-H</sub> = 8.0 Hz, <sup>3</sup>*J*<sub>H-H</sub> = 7.5 Hz, 1H) ppm. <sup>13</sup>C-NMR ((CD<sub>3</sub>)<sub>2</sub>SO and 1 drop of D<sub>2</sub>O, 200 MHz):  $\delta$  150.5, 149.6, 144.1, 136.9, 135.1, 131.7, 128.9, 127.4, 126.4, 123.7, 122.7, 120.8, 113.6, 112.9, 93.2, 87.2 ppm. HRMS (ESI/[M+H]<sup>+</sup>): calcd for C<sub>20</sub>H<sub>14</sub>N<sub>3</sub><sup>+</sup> 296.1182, found 296.1185. Anal. Calcd for C<sub>20</sub>H<sub>13</sub>N<sub>3</sub>·1/5THF: C, 80.65; H, 4.75; N, 13.57. Found: C, 80.41; H, 4.02; N, 13.97.

## Synthesis of compound **12**

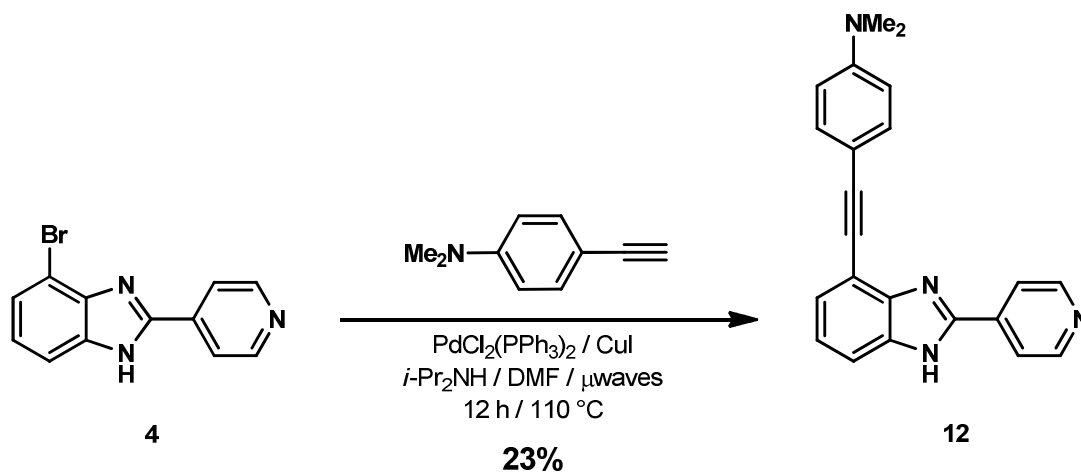

The entire amount of 4-ethynyl-*N,N*-dimethylaniline (prepared as in the synthesis of compound **6** described above) was added to a thick-walled microwave pressure vial that contained a mixture of compound **4** (300 mg, 1.09 mmol), PdCl<sub>2</sub>(PPh<sub>3</sub>)<sub>2</sub> (60.0 mg, 0.09 mmol), CuI (20.0 mg, 0.11 mmol), *i*-Pr<sub>2</sub>NH (5 mL), and DMF (5 mL). The vial was sealed and exposed to microwave irradiation for 12 h at 110 °C. After cooling, the reaction mixture was extracted with EtOAc, washed with brine, and dried over anhydrous MgSO<sub>4</sub>. The product was isolated by column chromatography, eluting first with pure EtOAc, and then successively with EtOAc/MeOH mixtures in 95:5 and 90:10 ratios. The solvent was removed under reduced pressure, and the solid was recrystallized from a mixture of THF, MeOH and hexane to give 85 mg (23%) of compound **12** as a yellow powder (mp 259 °C, with decomposition).

**12**: UV-Vis (THF):  $\lambda_{\text{max}}$  (log  $\epsilon$ ) = 265 (4.20), 294 (4.50), 315 (4.54), 357 (4.28) nm. IR (neat): 3098 (w,  $\tilde{\nu}_{\text{N-H}}$ ), 2215 (w,  $\tilde{\nu}_{\text{C=C}}$ ), 1608 (s,  $\tilde{\nu}_{\text{C=N}}$ ), 1524 (m), 1445 (m), 1363 (m), 1186 (m), 822 (m), 795 (m), 743 (s), 701 (m), 630 (m) cm<sup>-1</sup>. <sup>1</sup>H-NMR ((CD<sub>3</sub>)<sub>2</sub>SO and 1 drop of D<sub>2</sub>O, 500 MHz):  $\delta$  8.73 (dd, <sup>3</sup> $J_{\text{H-H}}$  = 6.3 Hz, 2H), 8.13 (br s, 2H), 7.60 (br s, 1H), 7.44 (d, <sup>3</sup> $J_{\text{H-H}}$  = 8.6 Hz, 2H), 7.36 (d, <sup>3</sup> $J_{\text{H-H}}$  = 8.0 Hz, 1H), 7.25 (dd, <sup>3</sup> $J_{\text{H-H}}$  = 8.0 Hz, <sup>3</sup> $J_{\text{H-H}}$  = 7.5 Hz, 1H), 6.72 (d, <sup>3</sup> $J_{\text{H-H}}$  = 9.2 Hz, 2H), 2.93 (s, 6H) ppm. <sup>13</sup>C-NMR ((CD<sub>3</sub>)<sub>2</sub>SO and 1 drop of D<sub>2</sub>O, 200 MHz):  $\delta$  150.6, 150.4, 149.3, 143.9, 137.0, 135.2, 132.8, 125.9, 123.8, 120.8, 114.8, 112.1, 108.9, 95.1, 85.1, 39.5 ppm. HRMS (ESI/[M+H]<sup>+</sup>): calcd for C<sub>22</sub>H<sub>19</sub>N<sub>4</sub><sup>+</sup> 339.1604, found 339.1605. Anal. Calcd for C<sub>22</sub>H<sub>18</sub>N<sub>4</sub>·½THF: C, 76.98; H, 5.92; N, 14.96. Found: C, 75.33; H, 5.35; N, 15.33.

### Synthesis of compound **13**

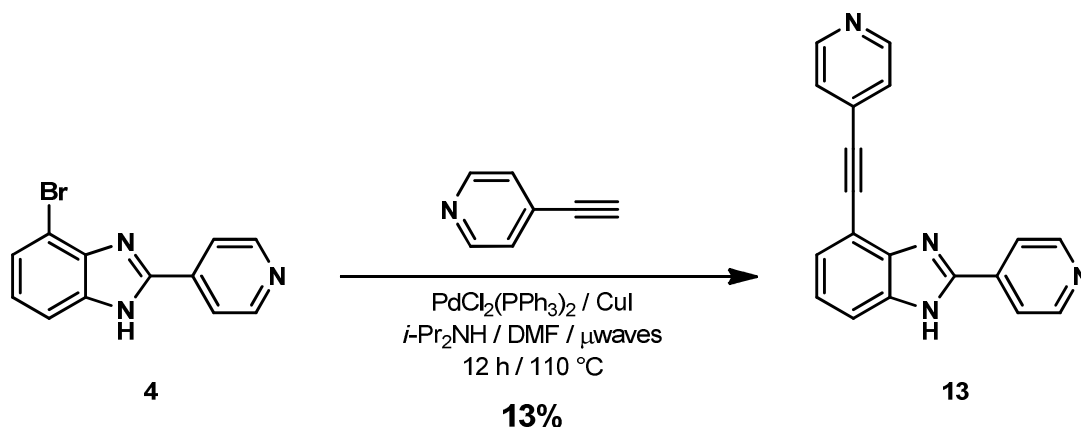

The entire amount of 4-ethynylpyridine (prepared as in the synthesis of compound **7** described above) was added to a thick-walled microwave pressure vial that contained a mixture of compound **4** (300 mg, 1.09 mmol),  $\text{PdCl}_2(\text{PPh}_3)_2$  (60.0 mg, 0.09 mmol),  $\text{CuI}$  (20.0 mg, 0.11 mmol),  $i\text{-Pr}_2\text{NH}$  (5 mL), and  $\text{DMF}$  (5 mL). The vial was sealed and exposed to microwave irradiation for 12 h at  $110^\circ\text{C}$ . After cooling, the reaction mixture was extracted with  $\text{EtOAc}$ , washed with brine, and dried over anhydrous  $\text{MgSO}_4$ . The product was isolated by column chromatography, eluting first with pure  $\text{EtOAc}$ , and then successively with  $\text{EtOAc/MeOH}$  mixtures in 95:5 and 90:10 ratios. The solvent was removed under reduced pressure, and the solid was recrystallized from a mixture of  $\text{THF}$ ,  $\text{MeOH}$  and hexane to give 41 mg (13%) of compound **13** as an off-white powder (mp  $252^\circ\text{C}$ , with decomposition).

**13**: UV-Vis ( $\text{THF}$ ):  $\lambda_{\text{max}}$  ( $\log \epsilon$ ) = 262 (4.36), 277 (4.38), 289 (4.41), 327 (4.53) nm. IR (neat): 3067 (w,  $\tilde{\nu}_{\text{N-H}}$ ), 2227 (w,  $\tilde{\nu}_{\text{C=C}}$ ), 1601 (s,  $\tilde{\nu}_{\text{C=N}}$ ), 1438 (m), 829 (s), 792 (m), 738 (s), 698 (m), 613 (m)  $\text{cm}^{-1}$ .  $^1\text{H-NMR}$  ( $(\text{CD}_3)_2\text{SO}$ , 500 MHz):  $\delta$  13.20 (br s, 1H), 8.75 (d,  $^3J_{\text{H-H}} = 6.3$  Hz, 2H), 8.64 (d,  $^3J_{\text{H-H}} = 6.3$  Hz, 2H), 8.13 (d,  $^3J_{\text{H-H}} = 5.7$  Hz, 2H), 7.72 (d,  $^3J_{\text{H-H}} = 8.0$  Hz, 1H), 7.56 (d,  $^3J_{\text{H-H}} = 5.2$  Hz, 2H), 7.49 (d,  $^3J_{\text{H-H}} = 7.5$  Hz, 1H), 7.31 (dd,  $^3J_{\text{H-H}} = 8.0$  Hz,  $^3J_{\text{H-H}} = 7.5$  Hz, 1H) ppm.  $^{13}\text{C-NMR}$  ( $(\text{CD}_3)_2\text{SO}$  and 1 drop of  $\text{D}_2\text{O}$ , 200 MHz):  $\delta$  150.7, 150.0, 149.8, 144.3, 136.8, 135.2, 130.7, 127.0, 125.7, 123.9, 120.8, 113.9, 112.3, 91.7, 90.4 ppm. HRMS (ESI/[ $\text{M}+\text{H}$ ] $^+$ ): calcd for  $\text{C}_{19}\text{H}_{13}\text{N}_4^+$  297.1135, found 297.1136. Anal. Calcd for  $\text{C}_{19}\text{H}_{12}\text{N}_4 \cdot \frac{1}{3}\text{H}_2\text{O}$ : C, 75.48; H, 4.22; N, 18.53. Found: C, 75.19; H, 3.80; N, 18.22.

## NMR Spectra of New Compounds

$^1\text{H-NMR}$  spectrum of compound **2** (500 MHz,  $(\text{CD}_3)_2\text{CO-}d_6$  and 1 drop  $\text{D}_2\text{O}$ )

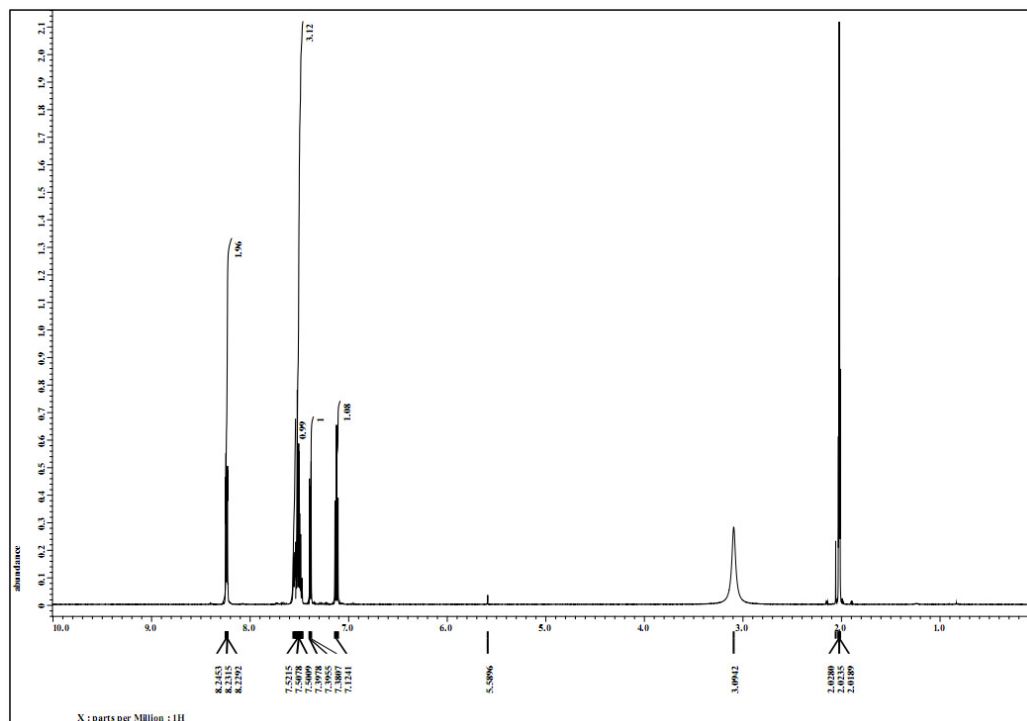

**2:**  $^{13}\text{C-NMR}$  (400 MHz,  $(\text{CD}_3)_2\text{CO-}d_6$  and 1 drop  $\text{D}_2\text{O}$ )

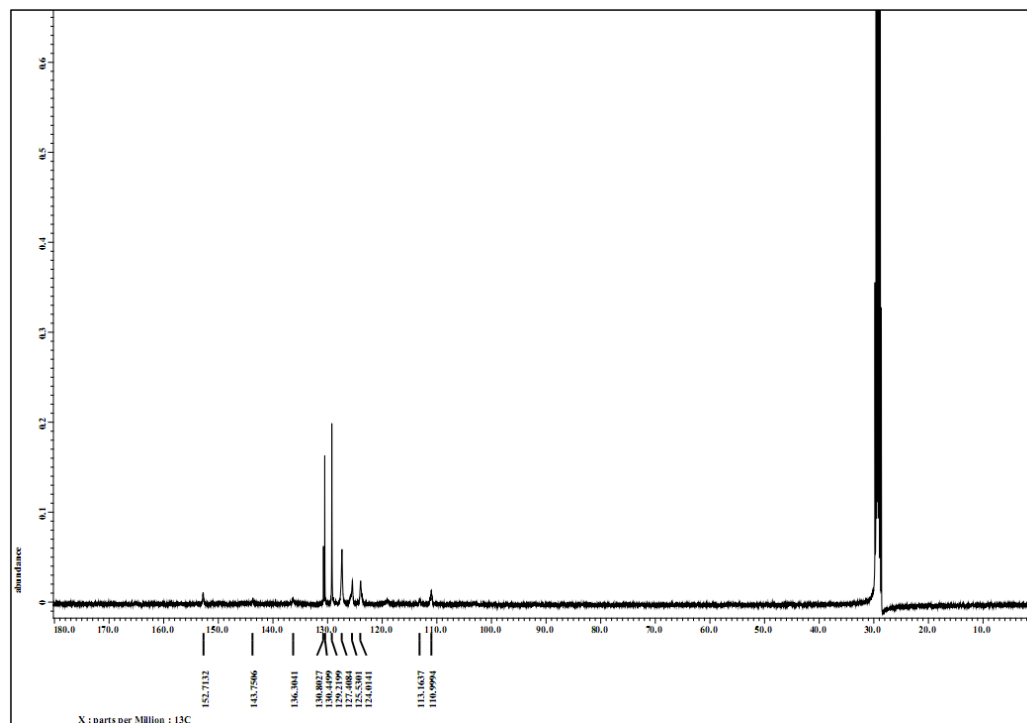

$^1\text{H-NMR}$  spectrum of compound **3** (500 MHz,  $\text{DMSO-}d_6$ )

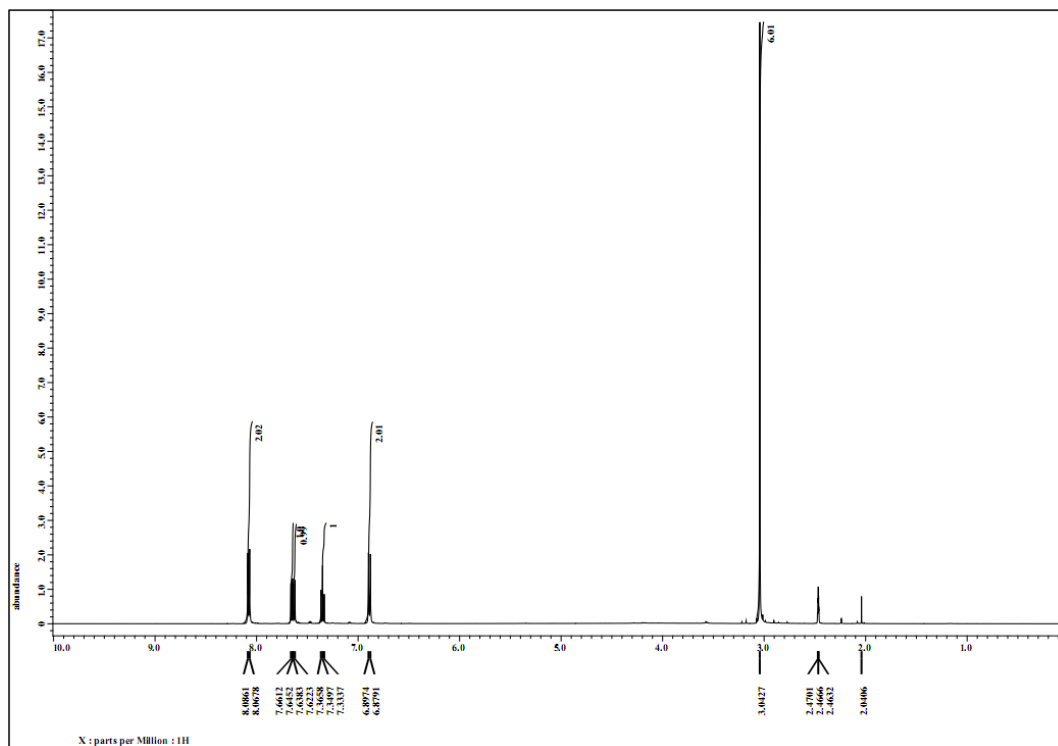

$^{13}\text{C-NMR}$  spectrum of compound **3** (500 MHz,  $\text{DMSO-}d_6$ )

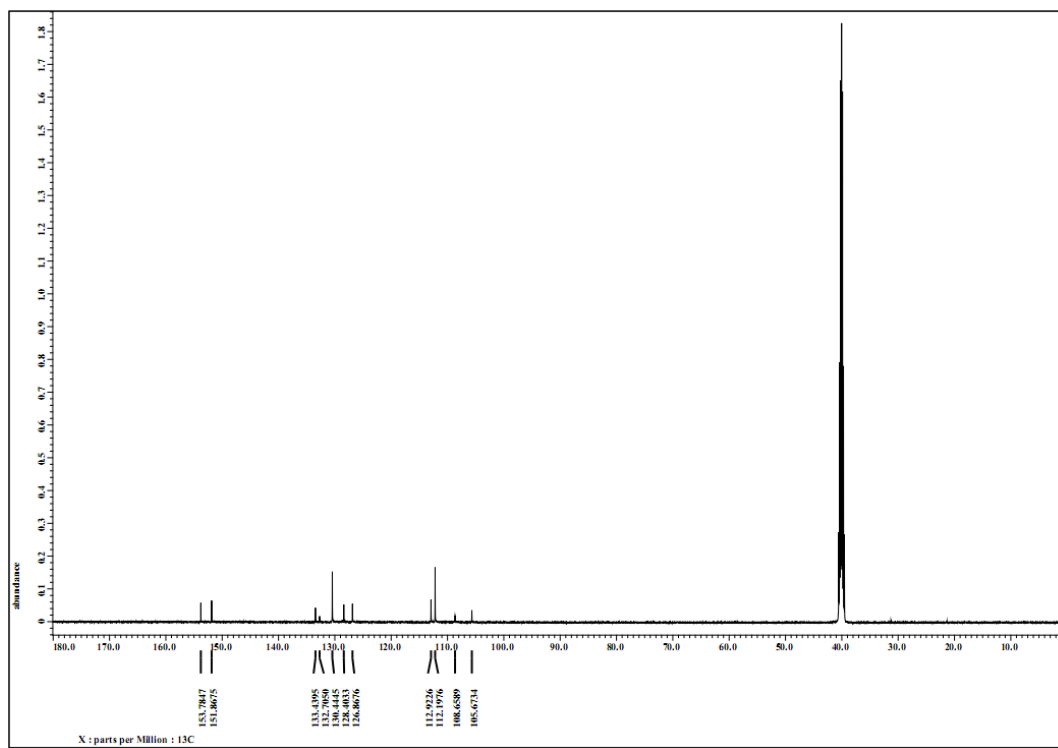

$^1\text{H-NMR}$  spectrum of compound **4** (500 MHz,  $\text{DMSO-}d_6$ )

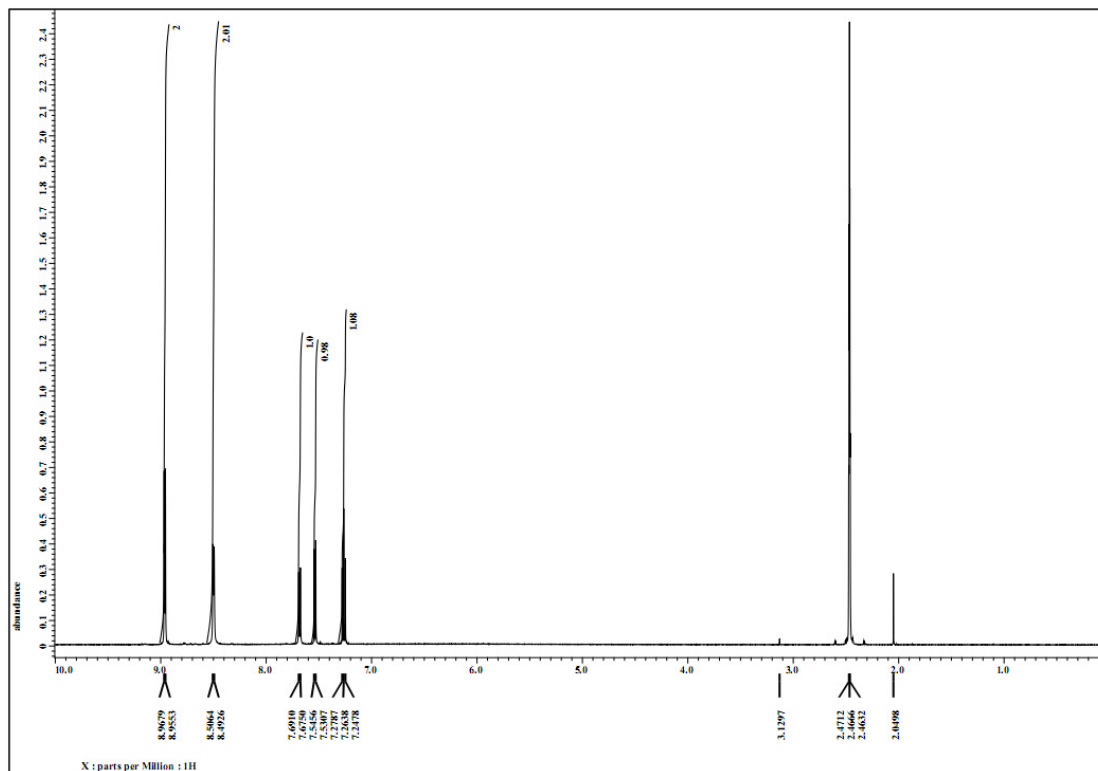

$^{13}\text{C-NMR}$  spectrum of compound **4** (125 MHz,  $\text{DMSO-}d_6$ )

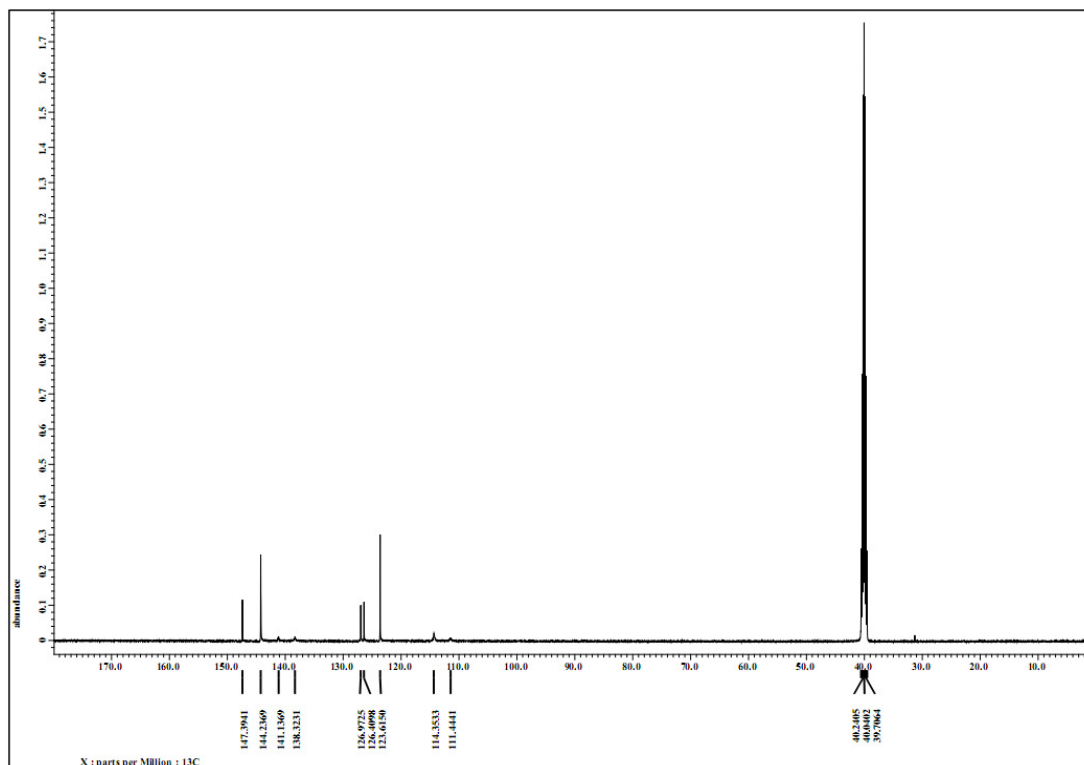



$^1\text{H-NMR}$  spectrum of compound **5** (500 MHz,  $(\text{CD}_3)_2\text{SO}$  and 1 drop of  $\text{D}_2\text{O}$ )

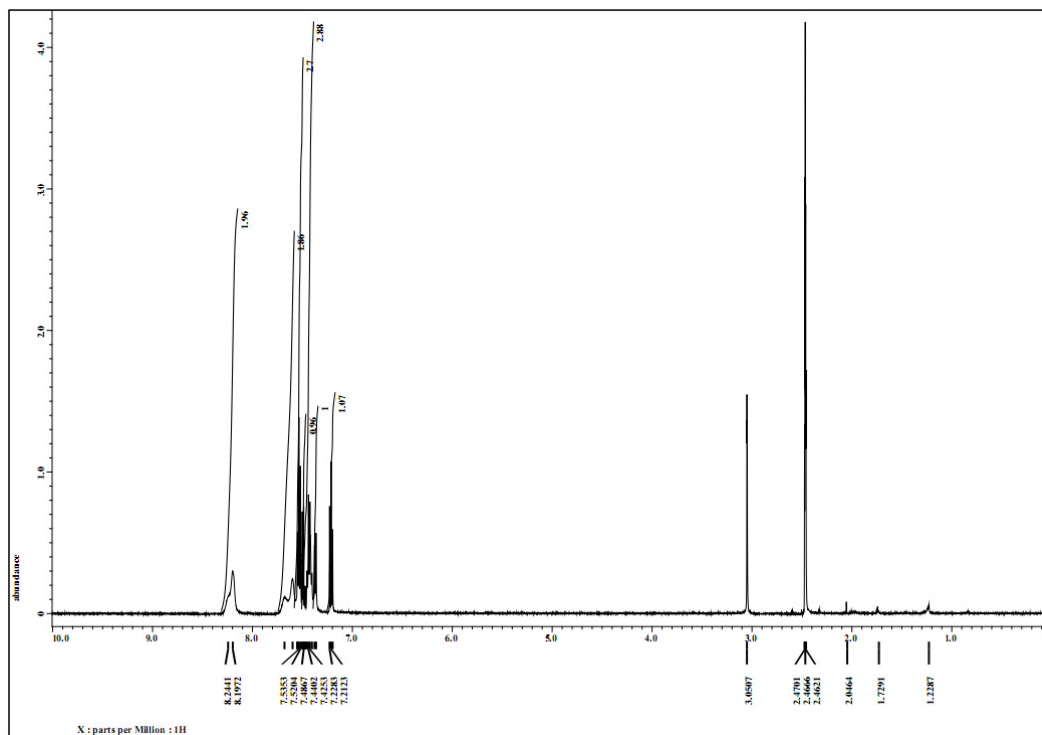

$^{13}\text{C-NMR}$  spectrum of compound **5** (200 MHz,  $(\text{CD}_3)_2\text{SO}$  and 1 drop of  $\text{D}_2\text{O}$ )

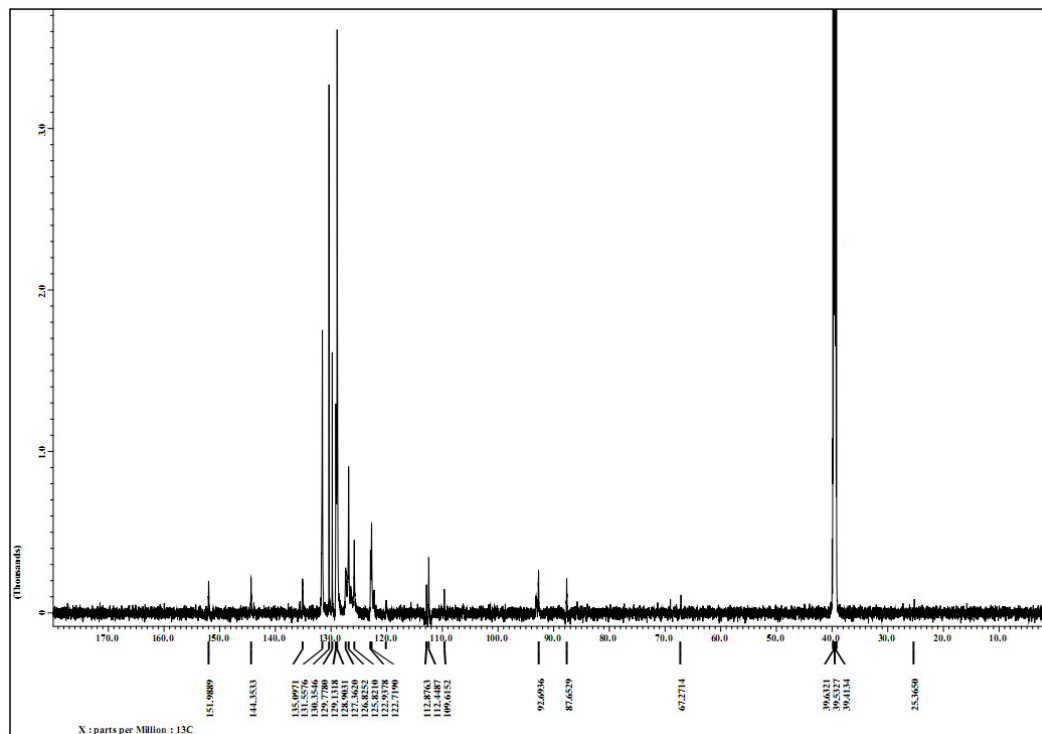

<sup>1</sup>H-NMR spectrum of compound **6** (500 MHz, (CD<sub>3</sub>)<sub>2</sub>SO and 1 drop of D<sub>2</sub>O)

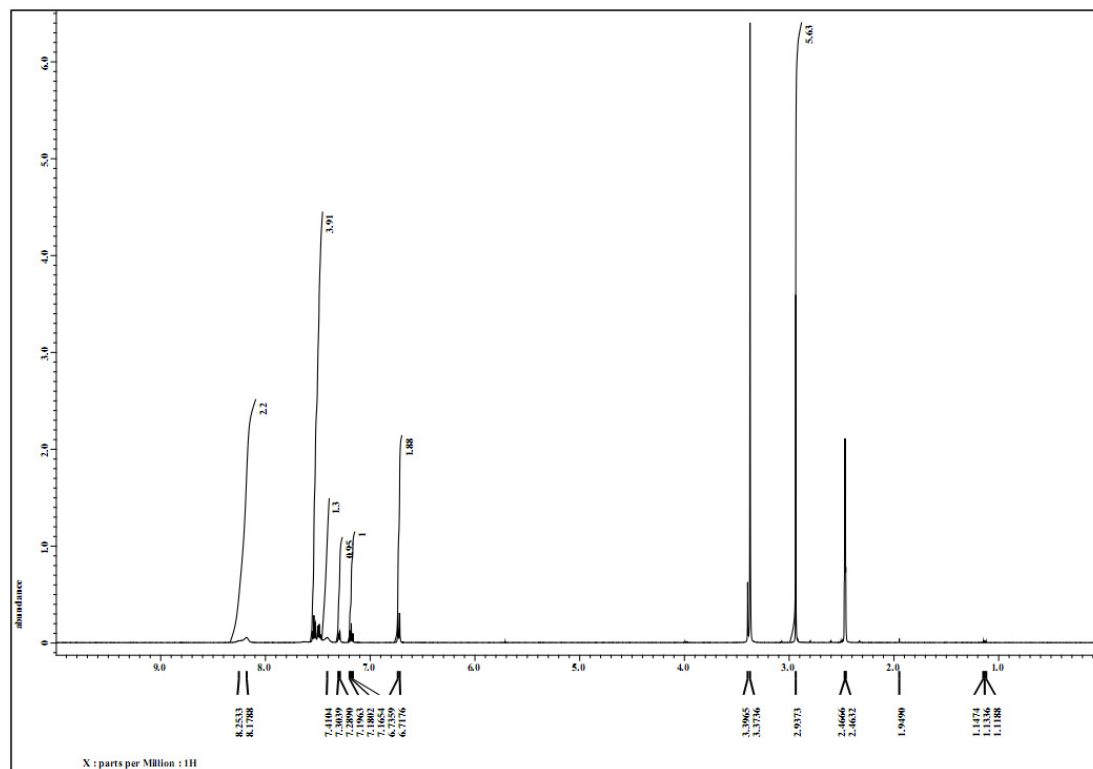

<sup>13</sup>C-NMR spectrum of compound **6** (200 MHz, (CD<sub>3</sub>)<sub>2</sub>SO and 1 drop of D<sub>2</sub>O)

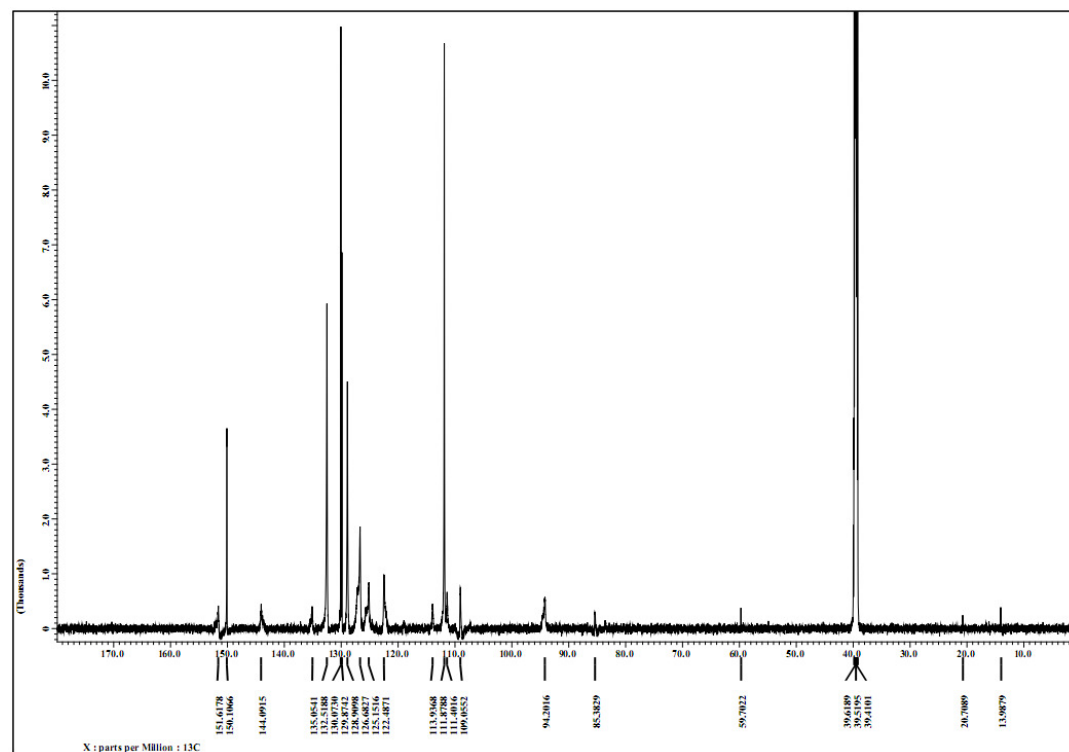

$^1\text{H-NMR}$  spectrum of compound **7** (500 MHz,  $(\text{CD}_3)_2\text{SO}$ )

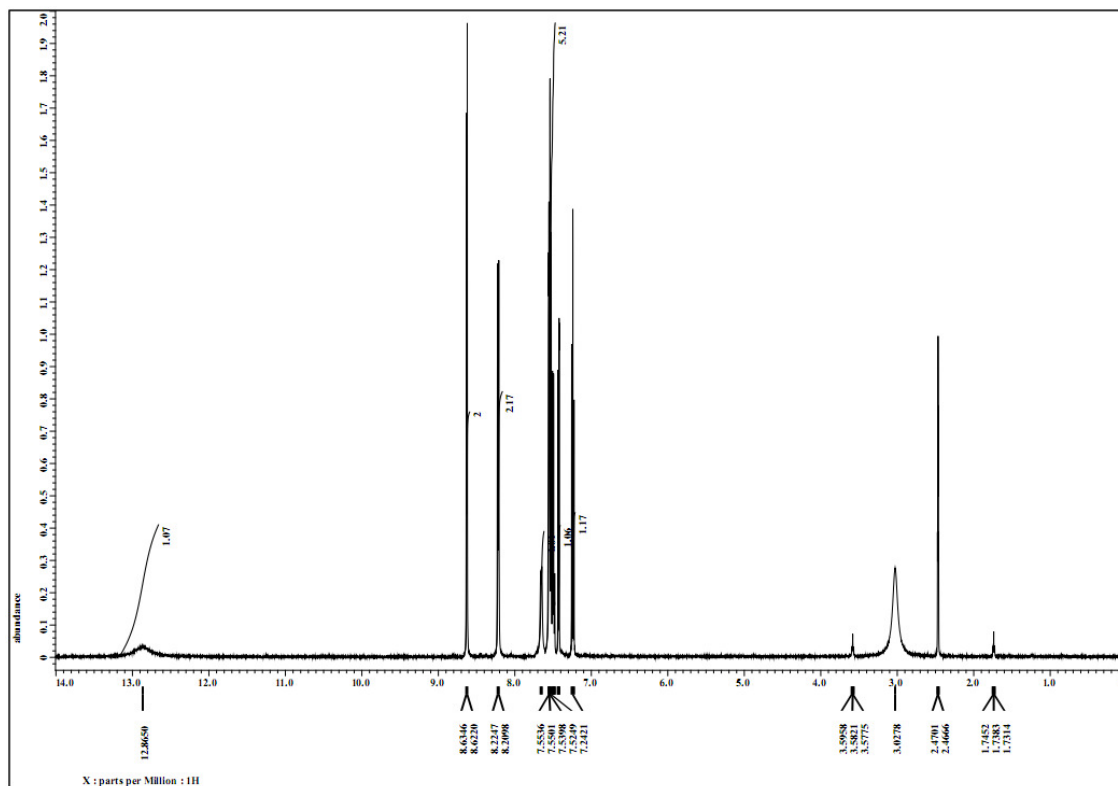

$^{13}\text{C-NMR}$  spectrum of compound **7** (200 MHz,  $(\text{CD}_3)_2\text{SO}$  and 1 drop of  $\text{D}_2\text{O}$ )

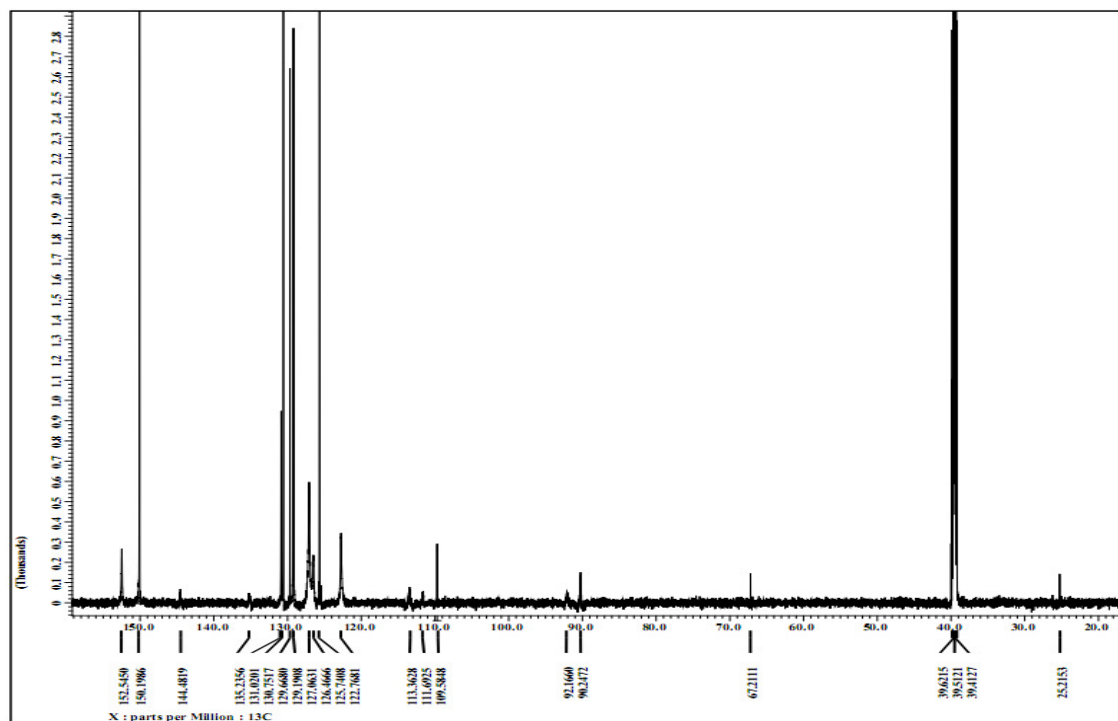

$^1\text{H-NMR}$  spectrum of compound **8** (400 MHz,  $\text{CDCl}_3$ )

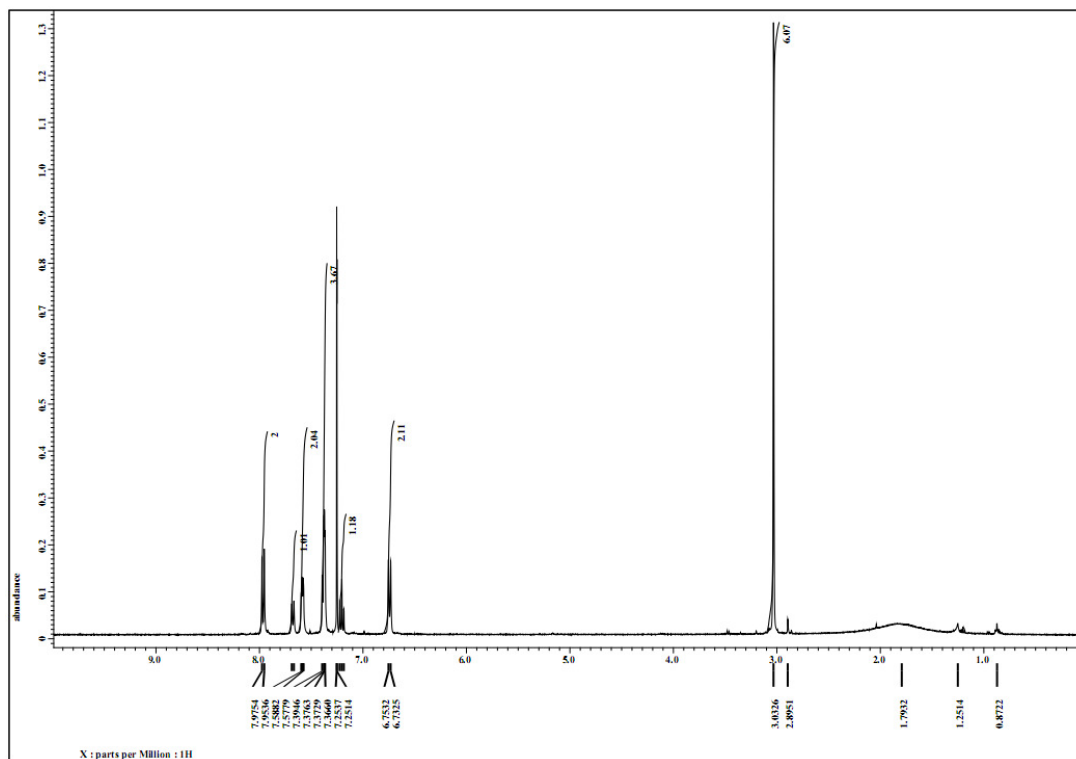

$^{13}\text{C-NMR}$  spectrum of compound **8** (200 MHz,  $\text{CDCl}_3$ )

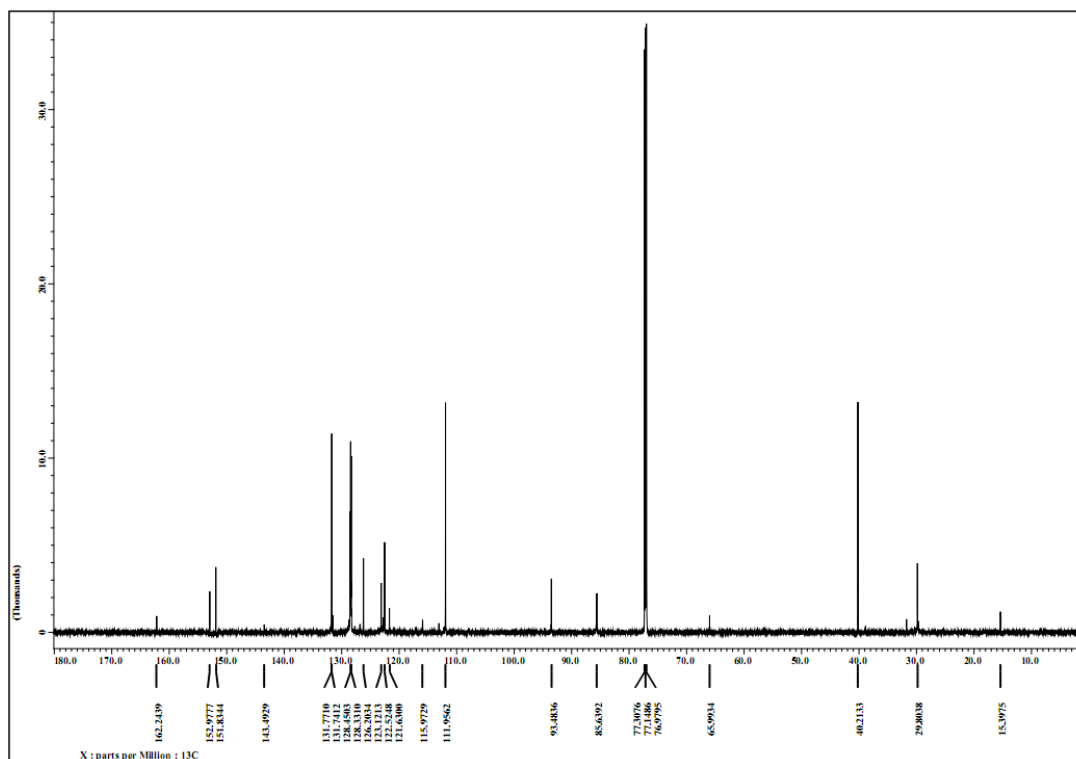

$^1\text{H-NMR}$  spectrum of compound **9** (500 MHz,  $(\text{CD}_3)_2\text{SO}$  and 3 drops of  $\text{D}_2\text{O}$ )

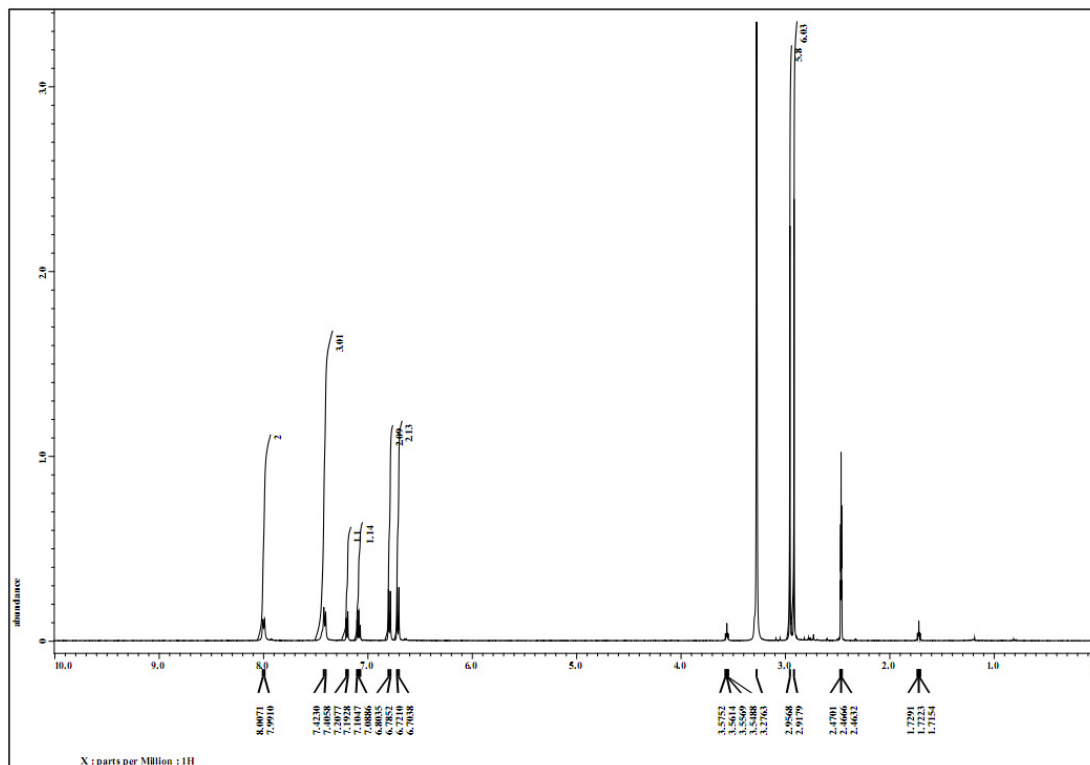

$^{13}\text{C-NMR}$  spectrum of compound **9** (200 MHz,  $(\text{CD}_3)_2\text{SO}$  and 1 drop of  $\text{D}_2\text{O}$ )

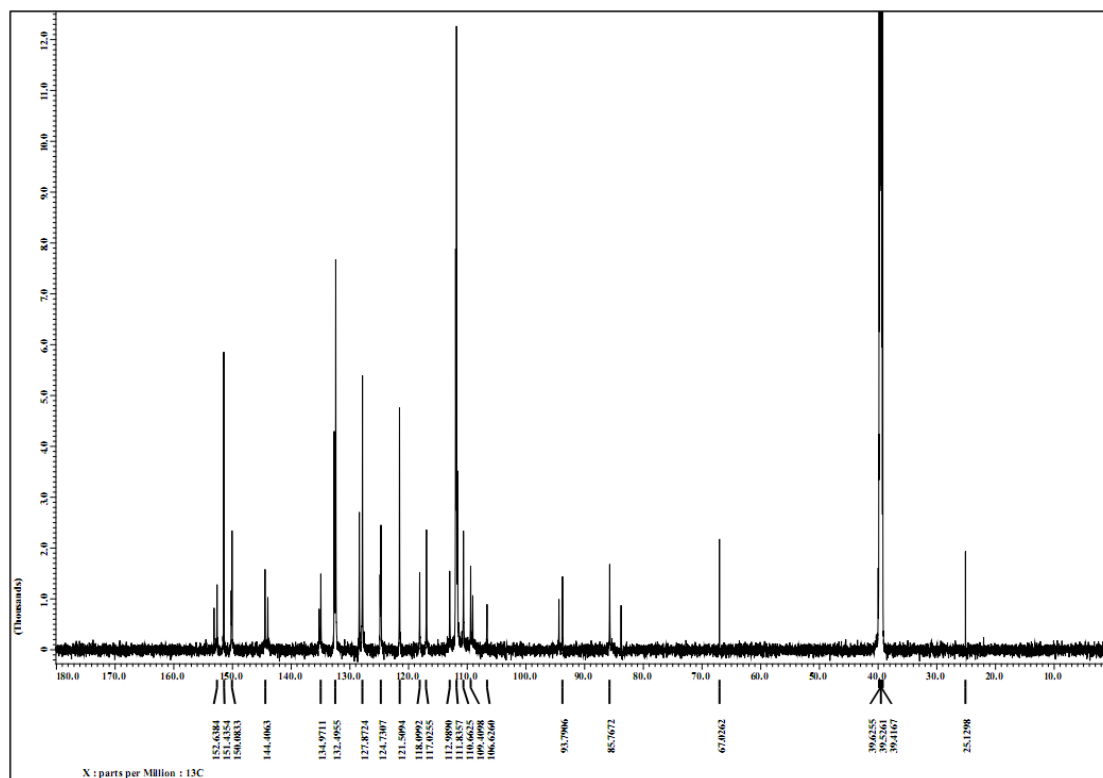

$^1\text{H-NMR}$  spectrum of compound **10** (500 MHz,  $(\text{CD}_3)_2\text{SO}$  and 1 drop of  $\text{D}_2\text{O}$ )

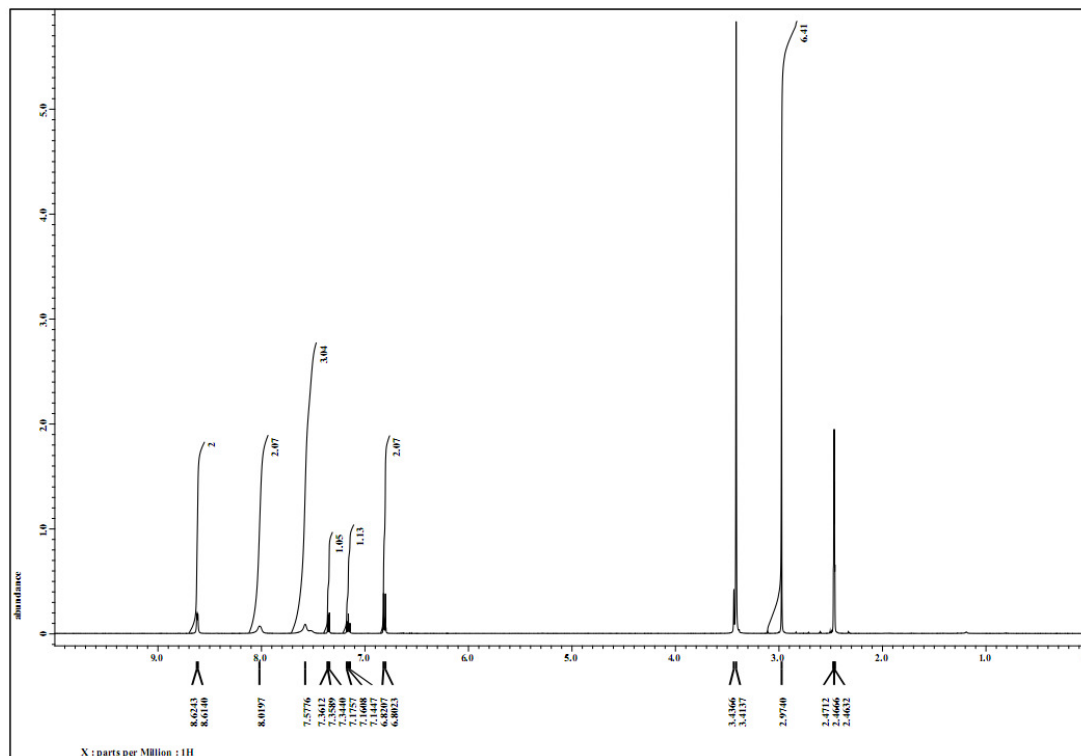

$^{13}\text{C-NMR}$  spectrum of compound **10** (200 MHz,  $(\text{CD}_3)_2\text{SO}$  and 1 drop of  $\text{D}_2\text{O}$ )

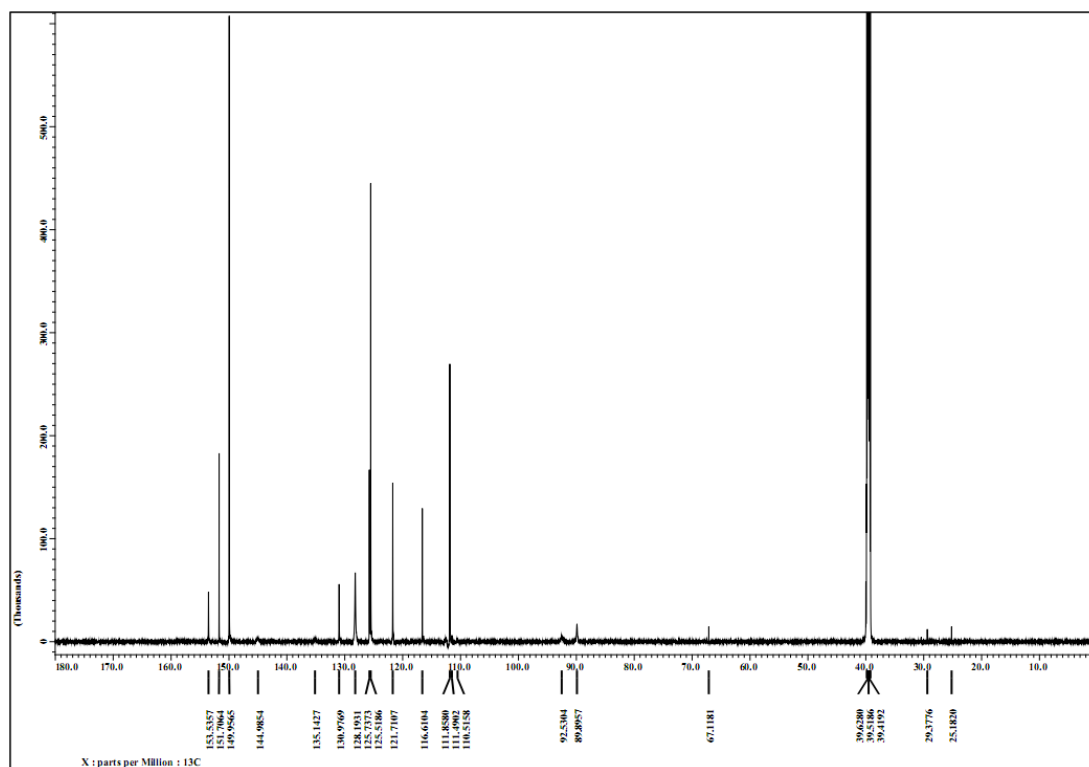

$^1\text{H-NMR}$  spectrum of compound **11** (500 MHz,  $(\text{CD}_3)_2\text{SO}$ )

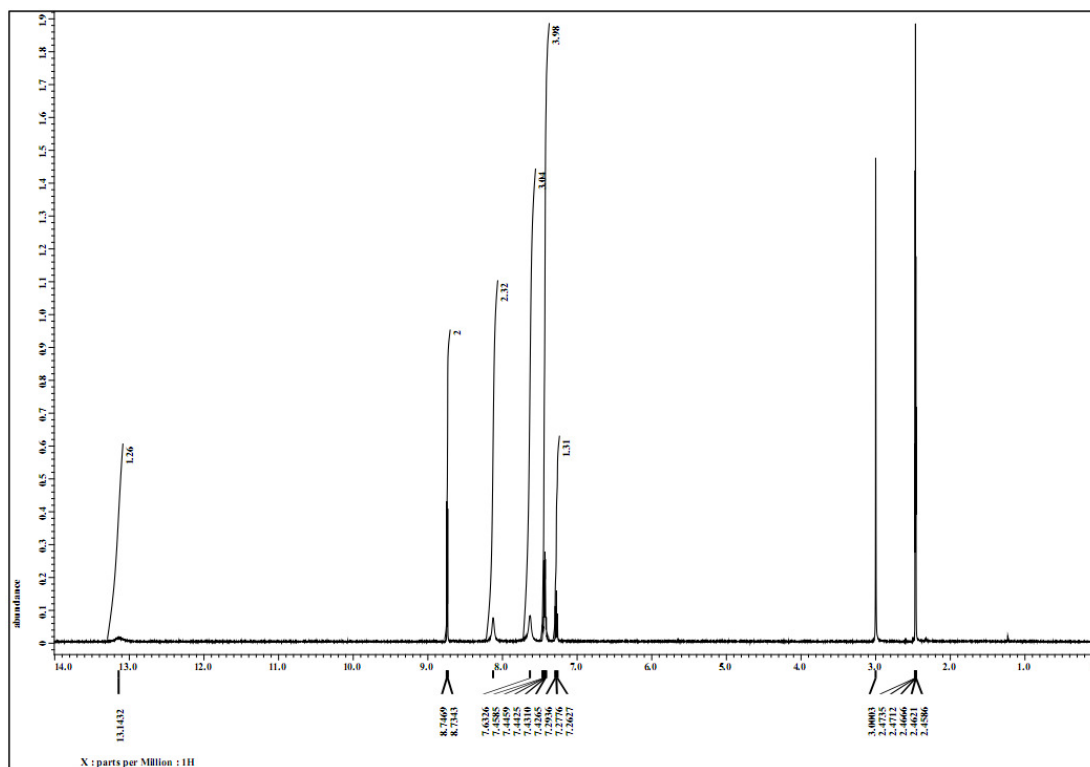

$^{13}\text{C-NMR}$  spectrum of compound **11** (200 MHz,  $(\text{CD}_3)_2\text{SO}$  and 1 drop of  $\text{D}_2\text{O}$ )

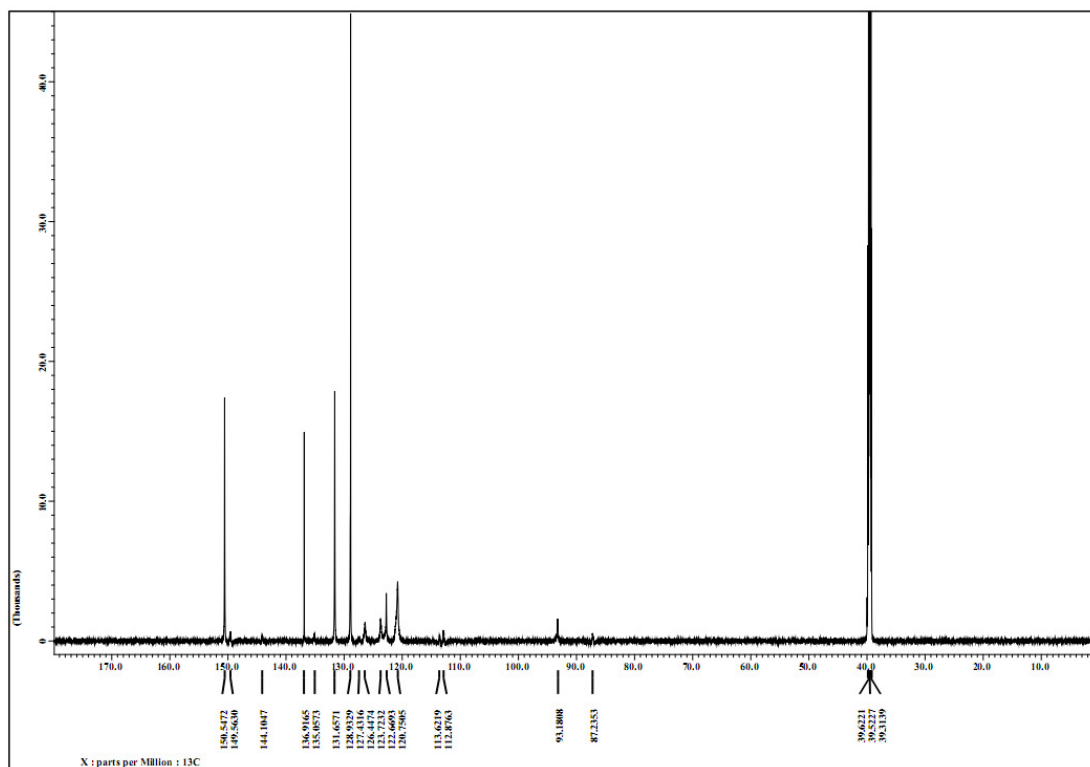

$^1\text{H-NMR}$  spectrum of compound **11** (500 MHz,  $(\text{CD}_3)_2\text{SO}$  and 1 drop of  $\text{D}_2\text{O}$ )

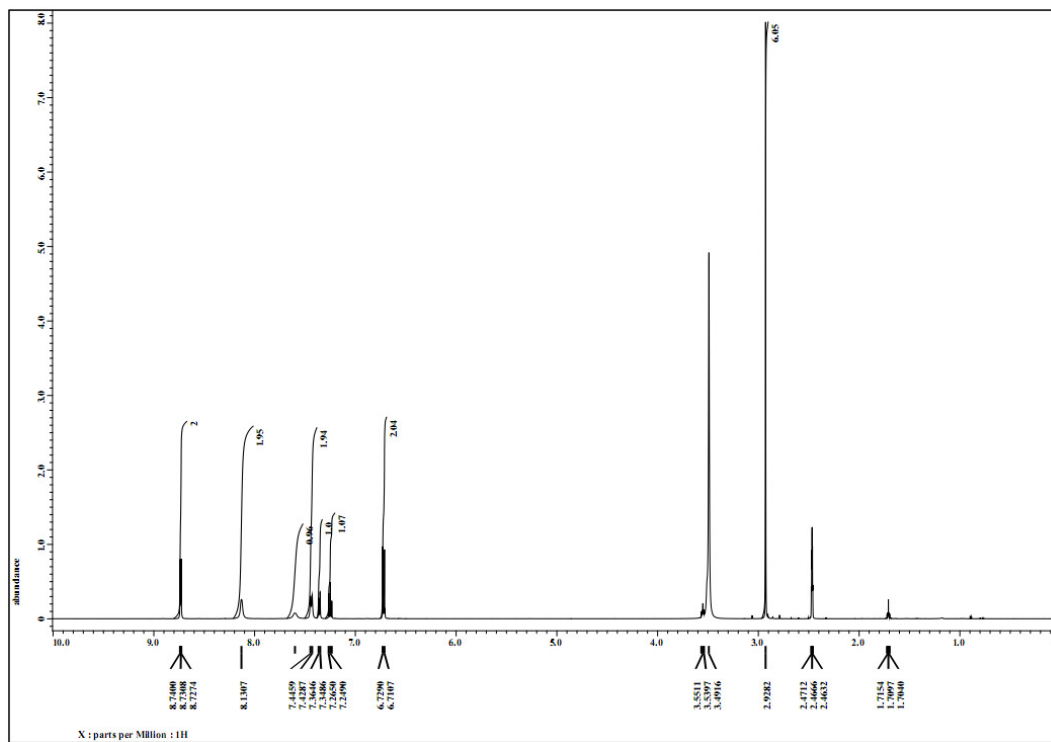

$^{13}\text{C-NMR}$  spectrum of compound **12** (200 MHz,  $(\text{CD}_3)_2\text{SO}$  and 1 drop of  $\text{D}_2\text{O}$ )

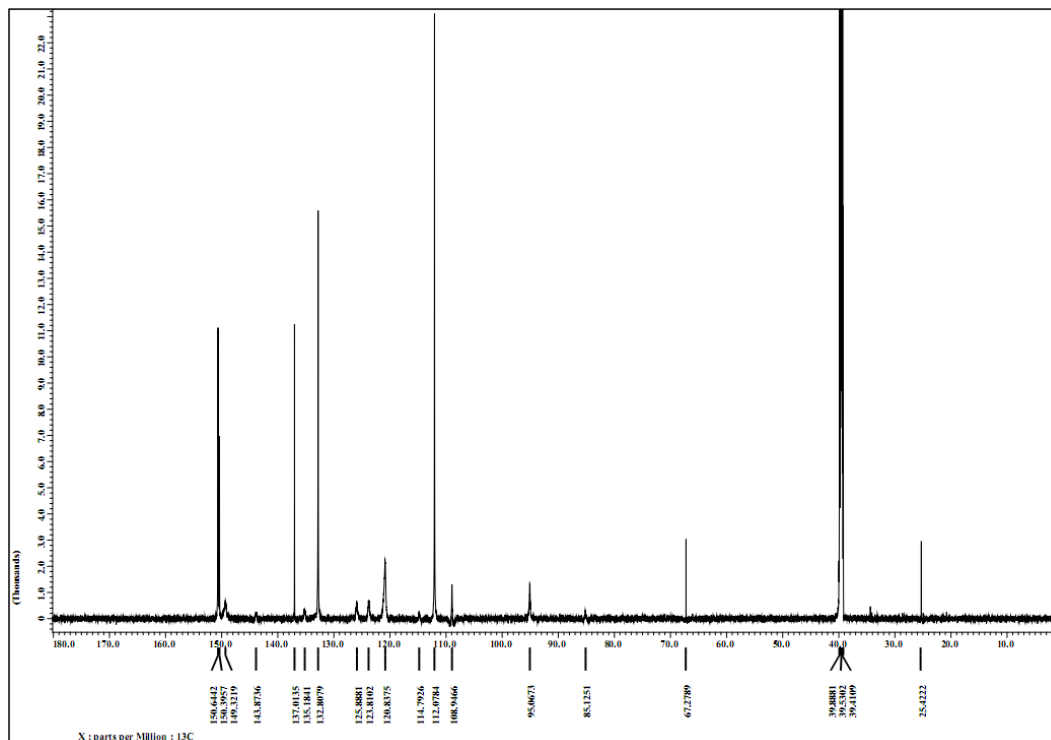



$^1\text{H-NMR}$  spectrum of compound **13** (500 MHz,  $(\text{CD}_3)_2\text{SO}$ )

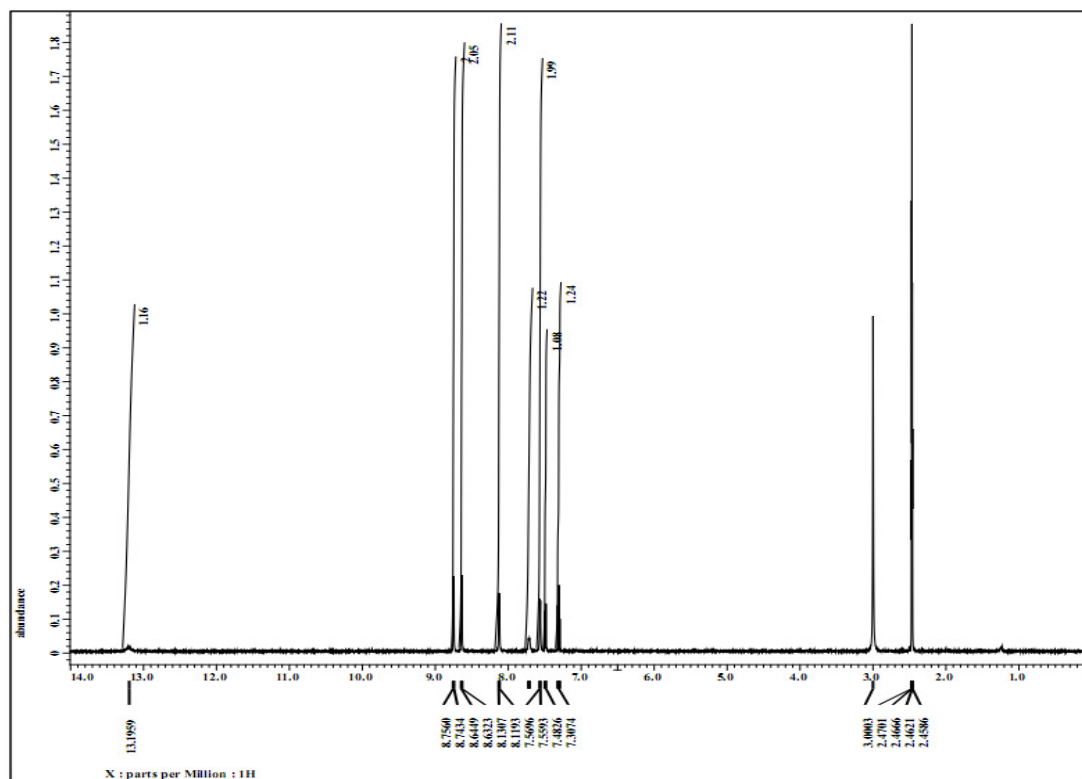

$^{13}\text{C-NMR}$  spectrum of compound **13** (200 MHz,  $(\text{CD}_3)_2\text{SO}$  and 1 drop of  $\text{D}_2\text{O}$ )

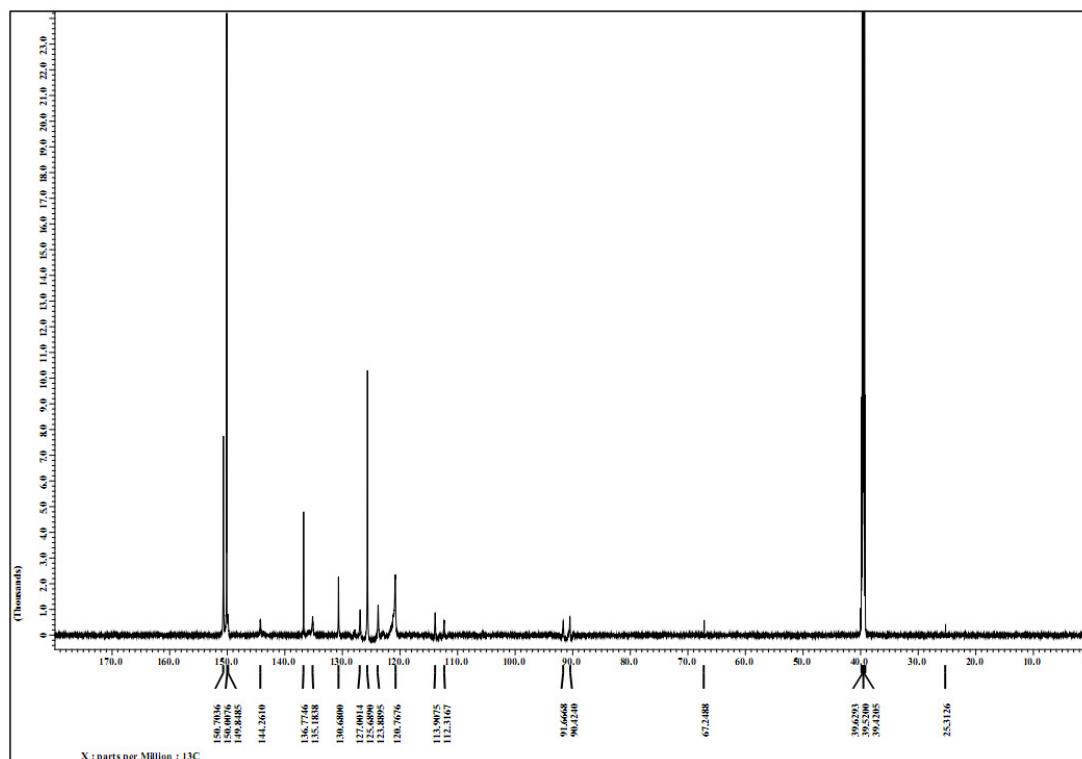

## Computational Studies

FMO calculations of compounds **5–13** were done using Gaussian 09W software package and its accompanying graphical interface program GaussView 5.0. The B3LYP hybrid density functional and a 6-31G<sup>++</sup> basis set were used for the geometry optimizations. All structures were optimized within a  $C_s$  symmetry constraint. Calculations were done for both tautomeric forms of the benzimidazoles; for each compound, the tautomer with the proton on the "top" nitrogen of the imidazole ring is shown first.

| Compound | HOMO                                                                                | LUMO                                                                                  |
|----------|-------------------------------------------------------------------------------------|---------------------------------------------------------------------------------------|
| 5        | 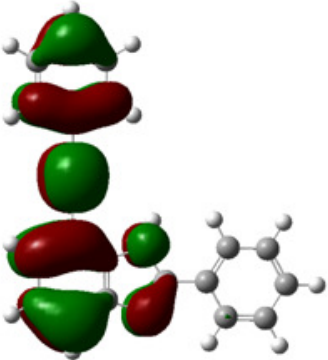  |   |
|          |  |  |

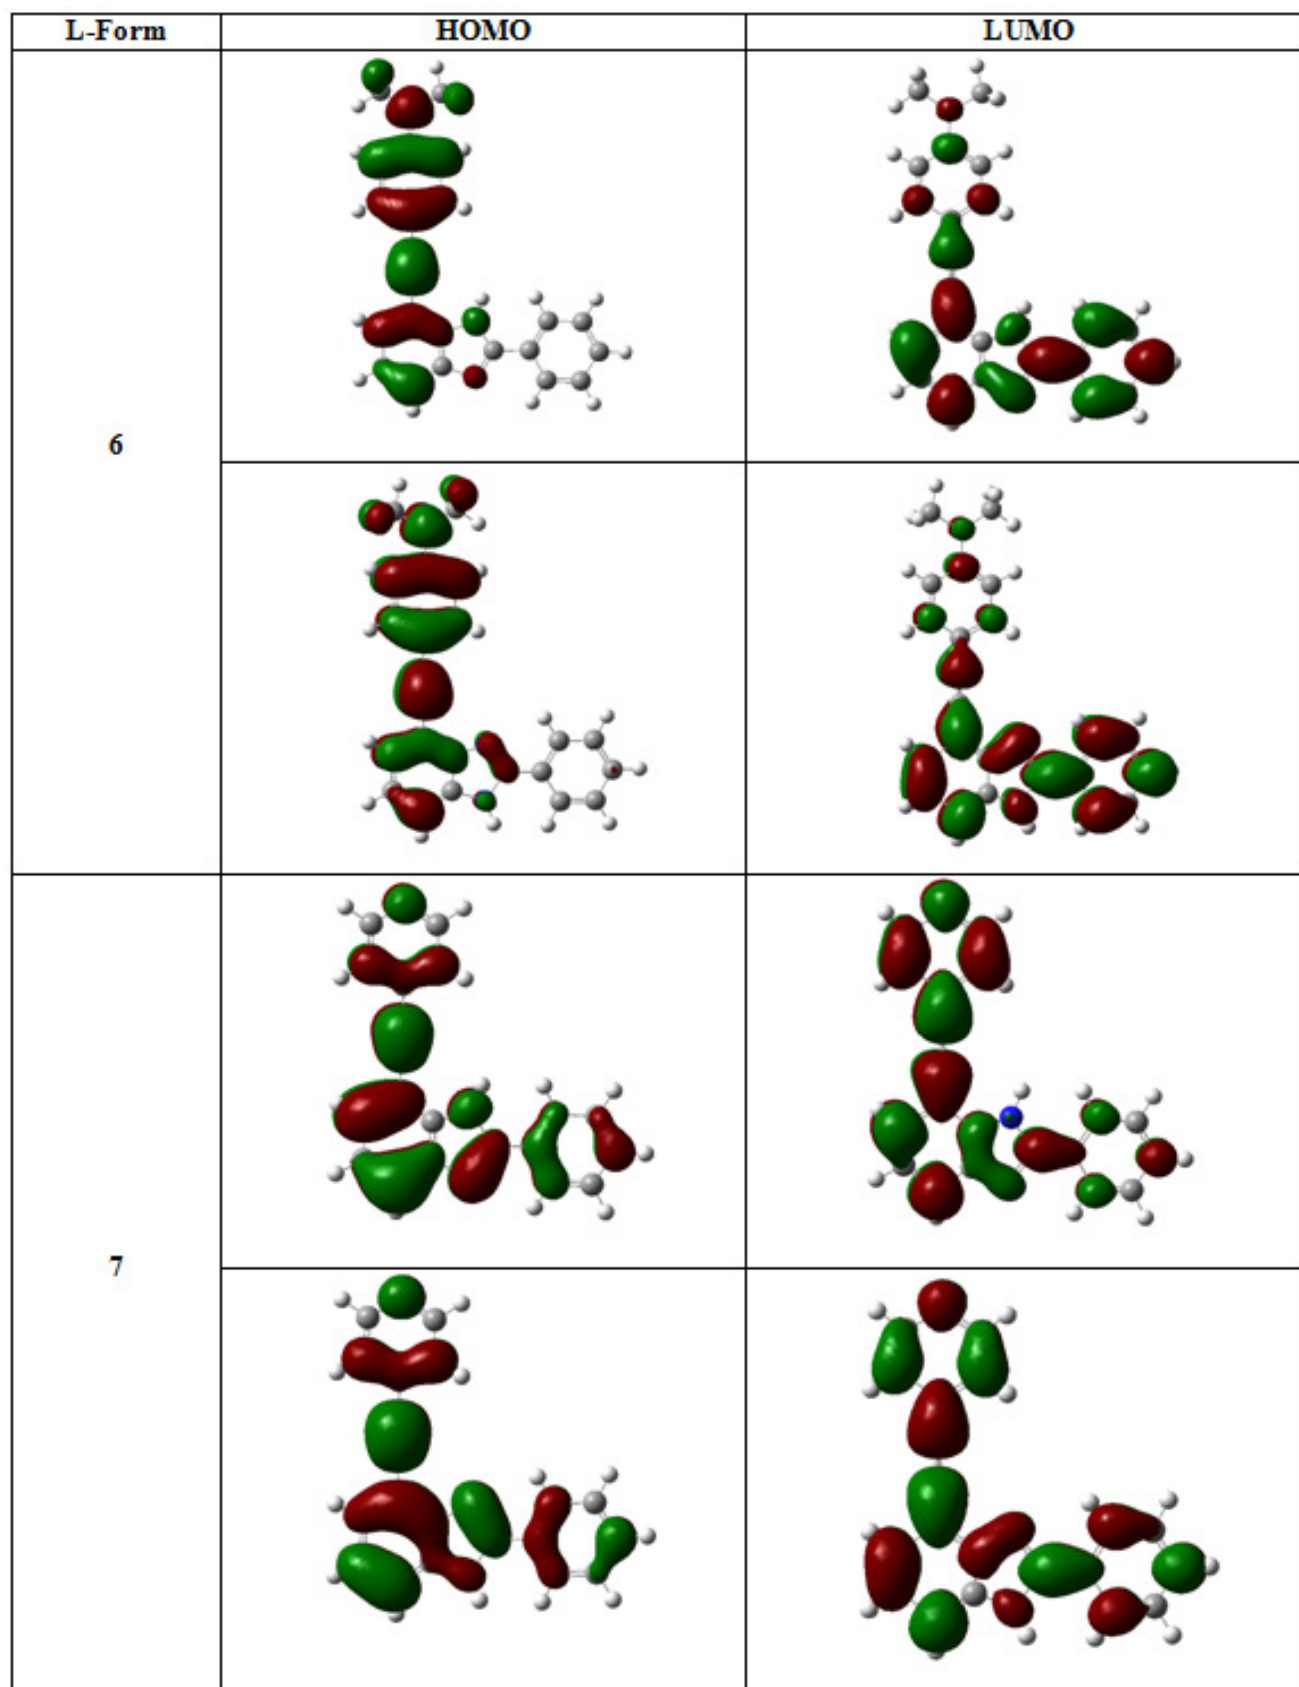

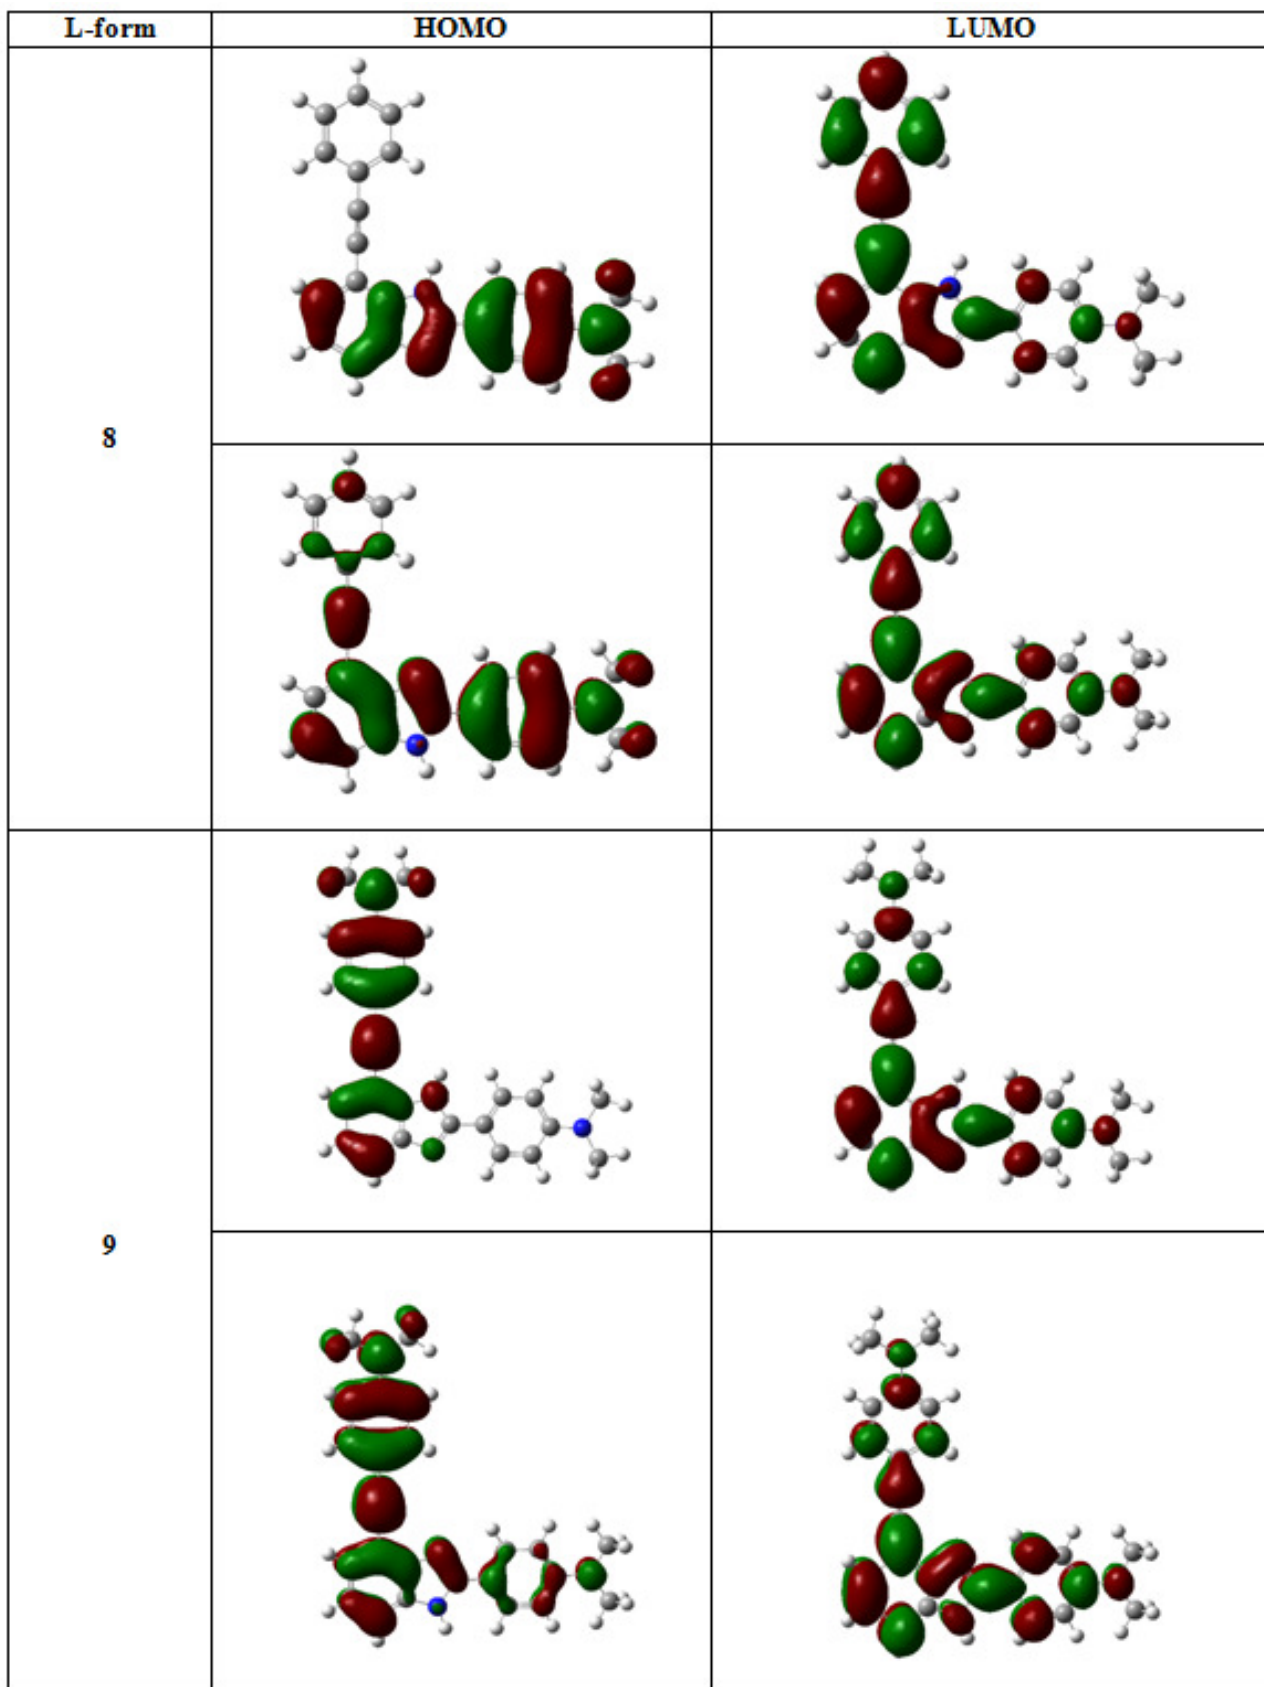

| L-form | HOMO                                                                                                                                                                                                                                                                                                | LUMO                                                                                                                                                                                                                                                                                                                                       |
|--------|-----------------------------------------------------------------------------------------------------------------------------------------------------------------------------------------------------------------------------------------------------------------------------------------------------|--------------------------------------------------------------------------------------------------------------------------------------------------------------------------------------------------------------------------------------------------------------------------------------------------------------------------------------------|
| 10     | 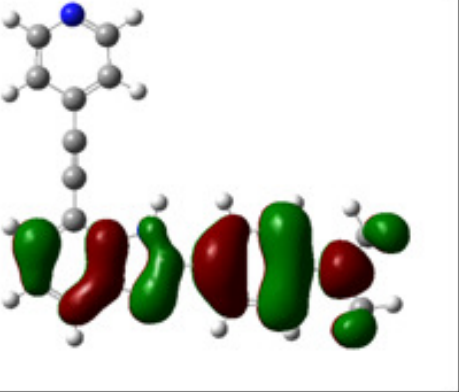 <p>Ball-and-stick model of the L-form molecule with its Highest Occupied Molecular Orbital (HOMO) orbital overlaid. The orbital is shown as a series of red and green lobes along the length of the molecule.</p> |  <p>Ball-and-stick model of the L-form molecule with its Lowest Unoccupied Molecular Orbital (LUMO) orbital overlaid. The orbital shows a complex distribution of red and green lobes, particularly concentrated in the upper part of the molecule.</p> |
|        |  <p>Ball-and-stick model of the L-form molecule with its HOMO orbital overlaid, rotated 90 degrees relative to the first image.</p>                                                                                |  <p>Ball-and-stick model of the L-form molecule with its LUMO orbital overlaid, rotated 90 degrees relative to the first image.</p>                                                                                                                     |
| 11     |  <p>Ball-and-stick model of the L-form molecule with its HOMO orbital overlaid. The orbital is primarily located in the upper portion of the molecule.</p>                                                        |  <p>Ball-and-stick model of the L-form molecule with its LUMO orbital overlaid. The orbital shows a complex distribution of red and green lobes across the molecule.</p>                                                                               |
|        |  <p>Ball-and-stick model of the L-form molecule with its HOMO orbital overlaid, rotated 90 degrees relative to the first image.</p>                                                                              |  <p>Ball-and-stick model of the L-form molecule with its LUMO orbital overlaid, rotated 90 degrees relative to the first image.</p>                                                                                                                    |

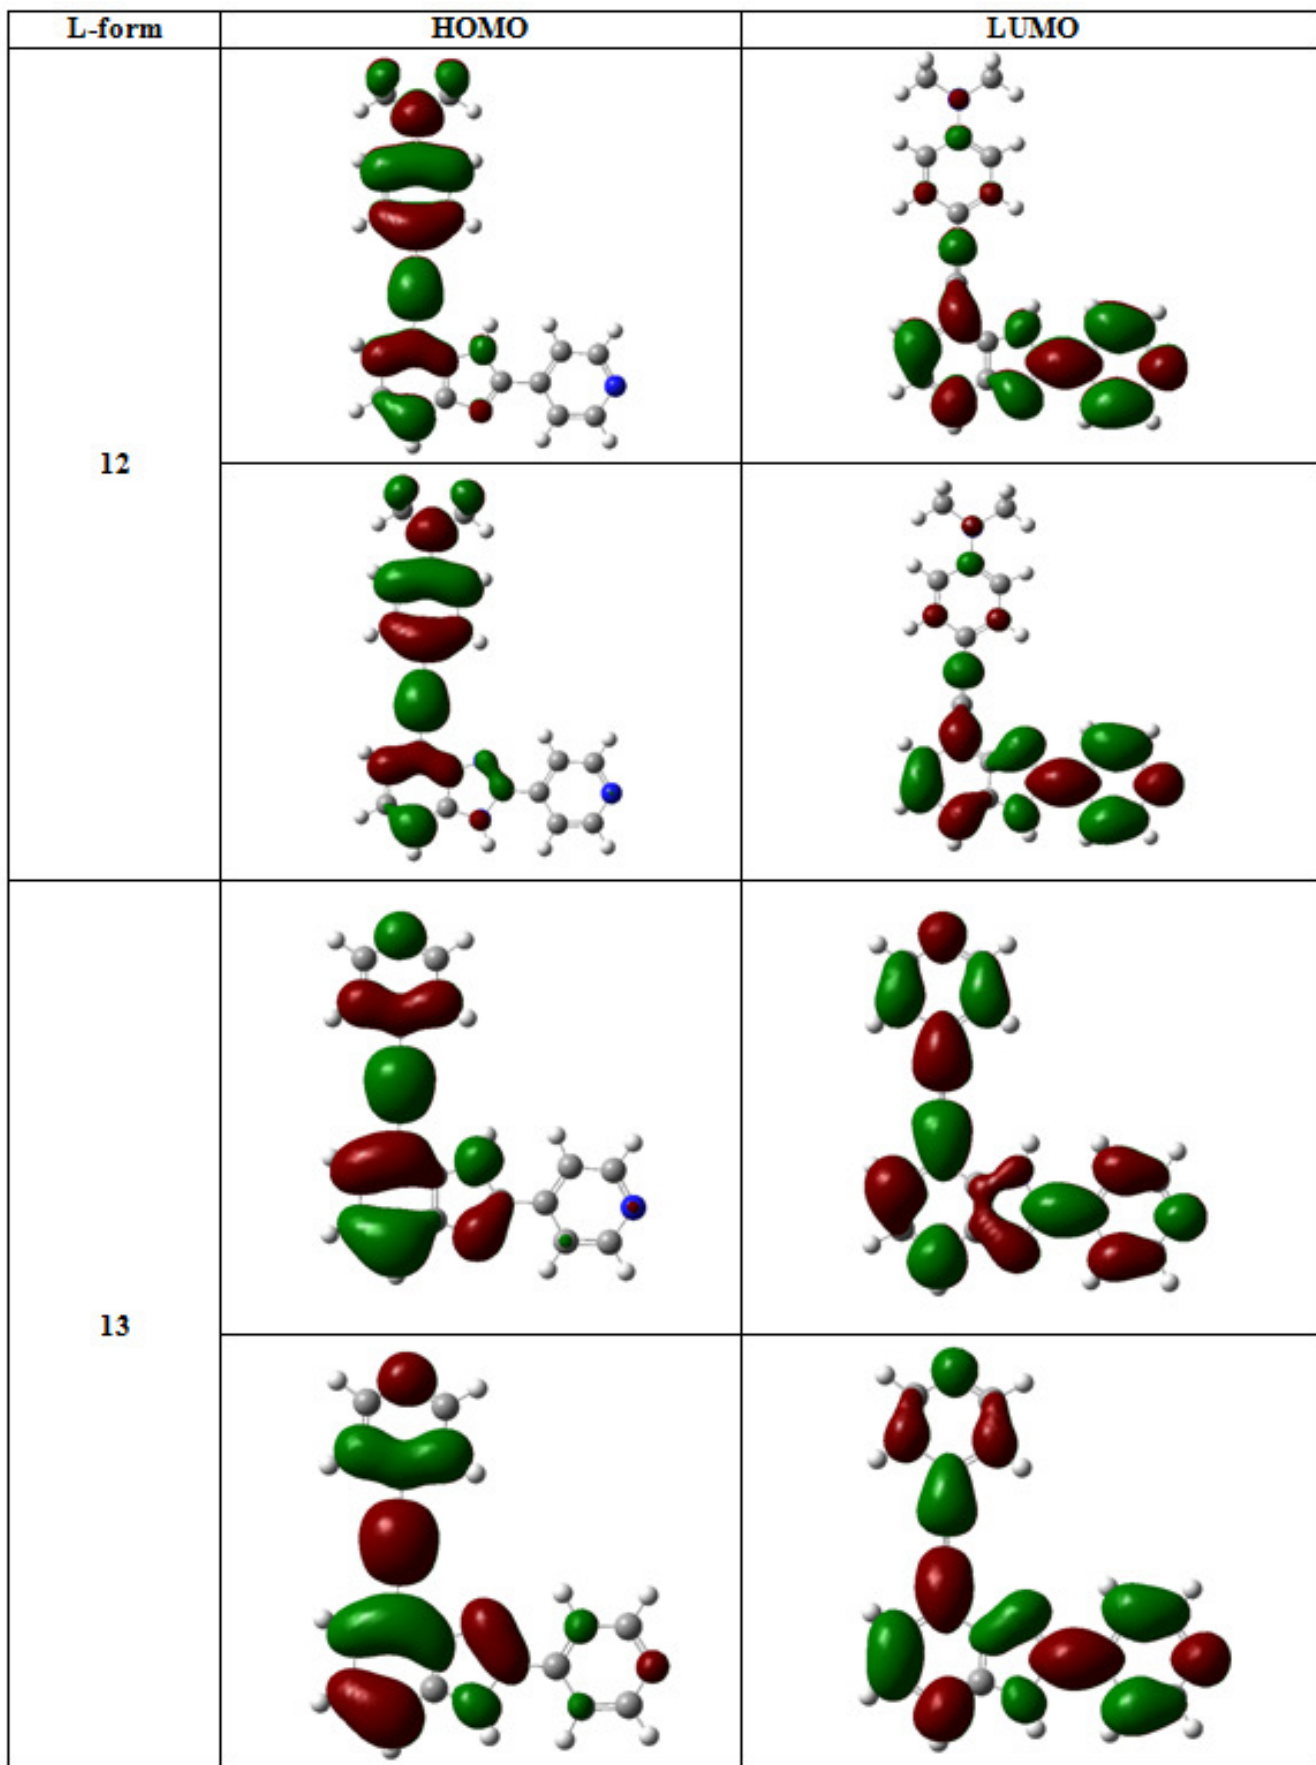



## UV/Vis absorption and fluorescence titrations of compounds 5–13 with acids and bases

UV-visible and fluorescence titrations were performed using Perkin-Elmer LAMBDA 25 UV/Vis Spectrometer and Perkin-Elmer Fluorescence Spectrometer LS-55, respectively. Five stock solutions of trifluoroacetic acid (TFA)—0.1 mM, 0.001 M, 0.01 M, 0.1 M, 1 M and 10 M and four stock solutions of 40% aqueous tetrabutylammonium hydroxide—0.1 mM, 0.001 M, 0.01 M and 0.1 M were prepared in THF. In a quartz cuvette, 3 mL of  $1 \times 10^{-5}$  M solution of a given fluorophore in THF were titrated using the stock solutions of (a) trifluoroacetic acid (TFA), or (b) 40% aqueous tetrabutylammonium hydroxide solution to give the indicated range of acid and base concentrations. The excitation wavelength used for fluorescence titration corresponds to the isosbestic point determined in the UV/Vis titration.

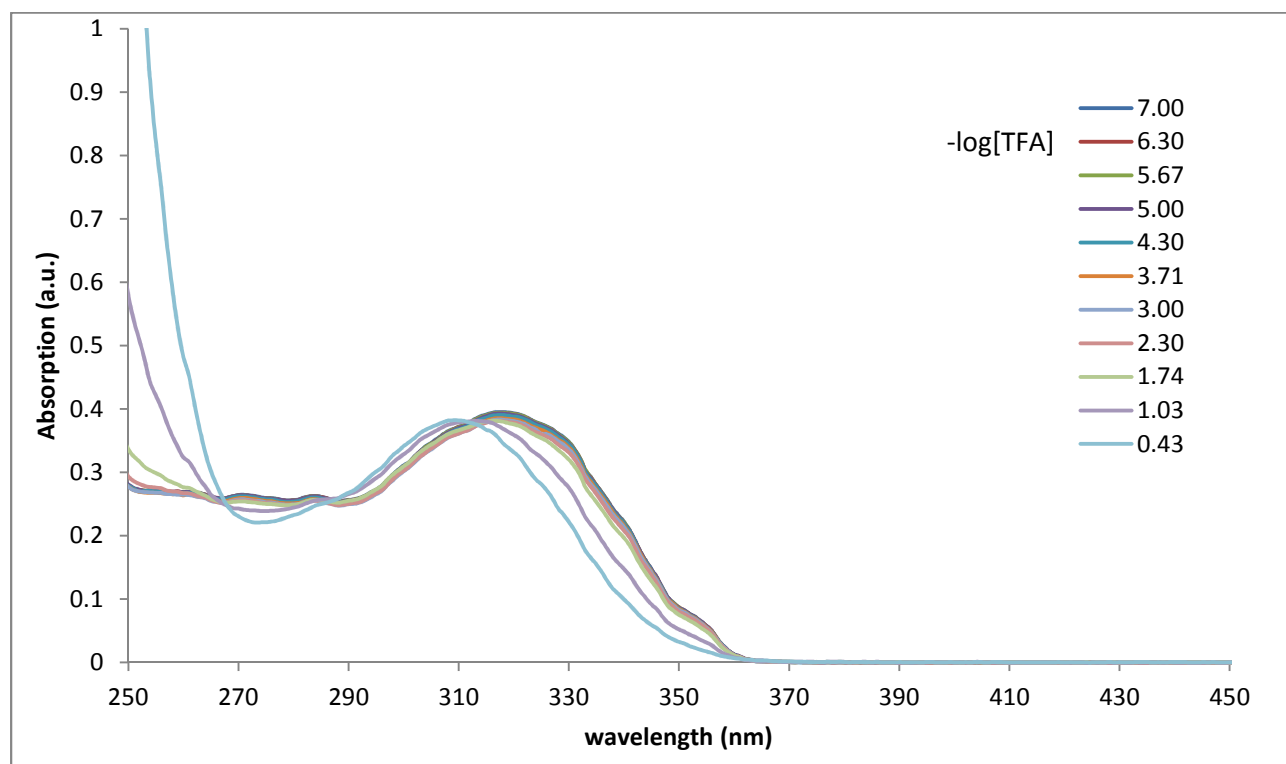

**Figure S1.** UV/Vis absorption titration of compound 5 with TFA.

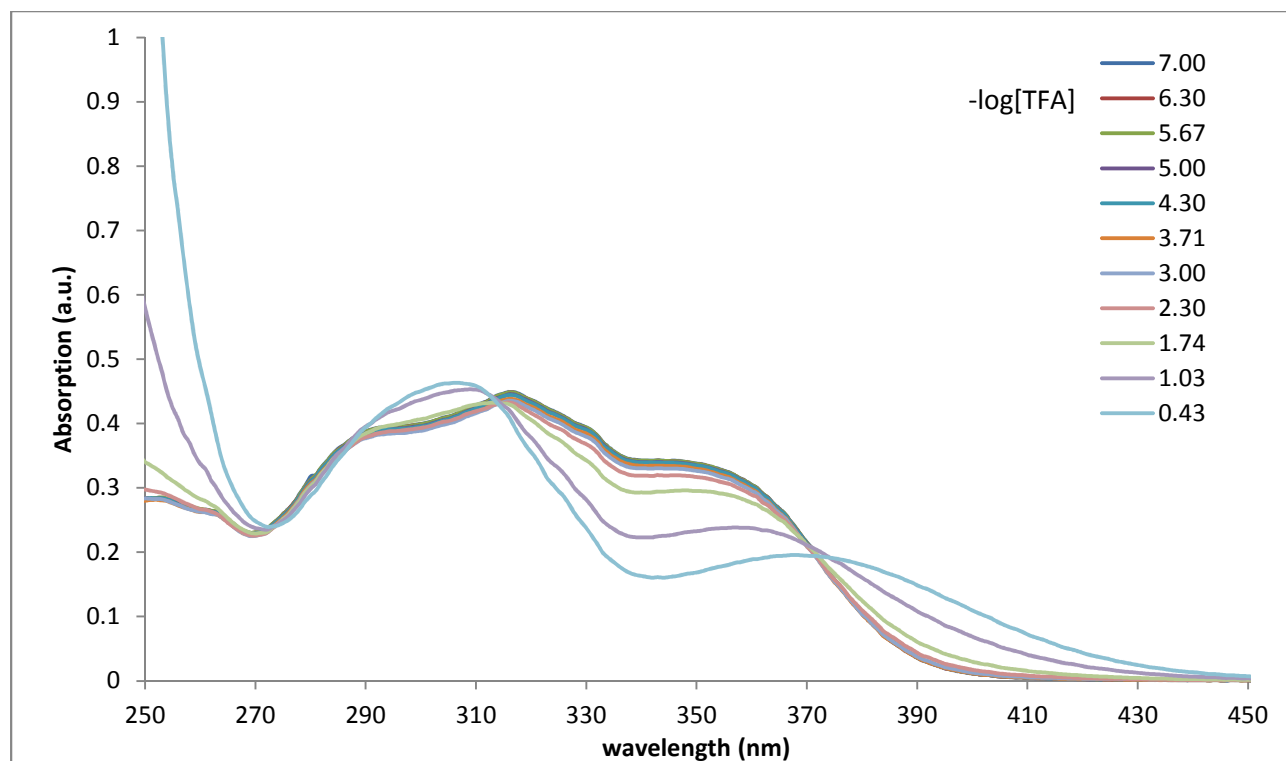

**Figure S2.** UV/Vis absorption titration of compound **6** with TFA.

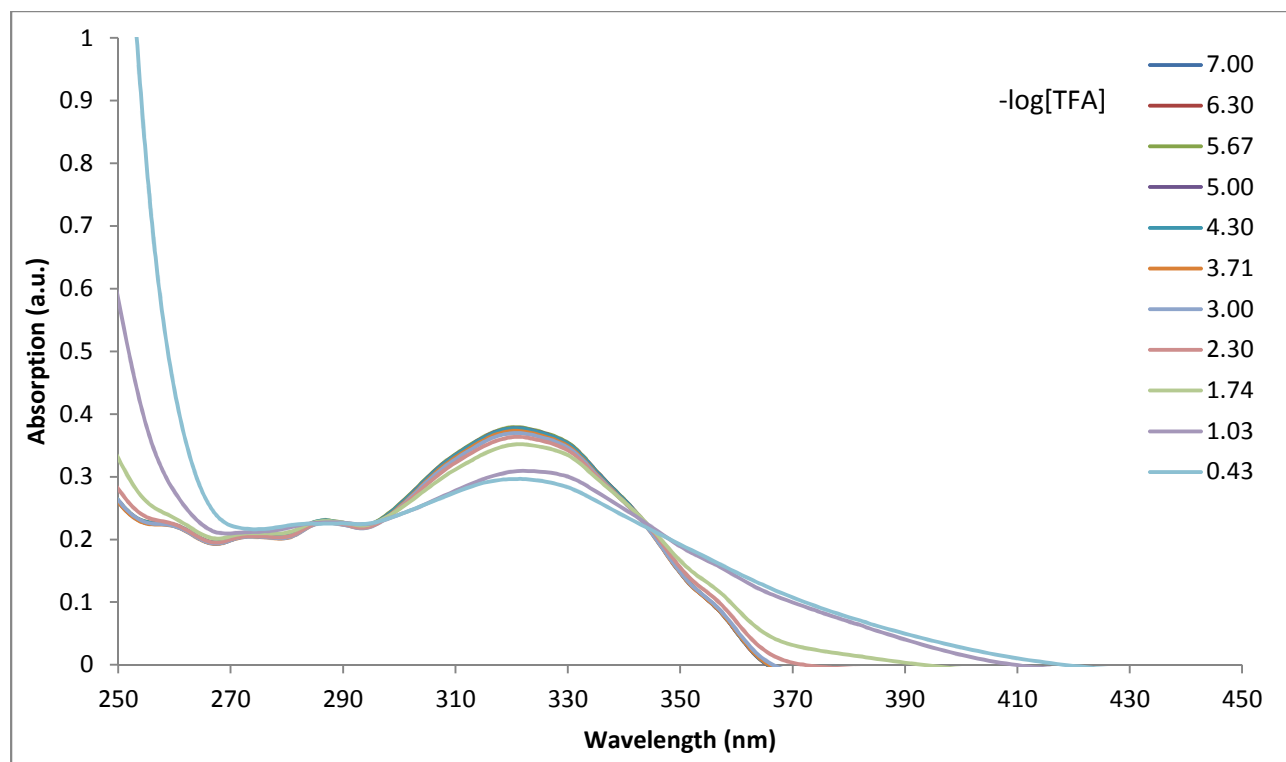

**Figure S3.** UV/Vis absorption titration of compound **7** with TFA.



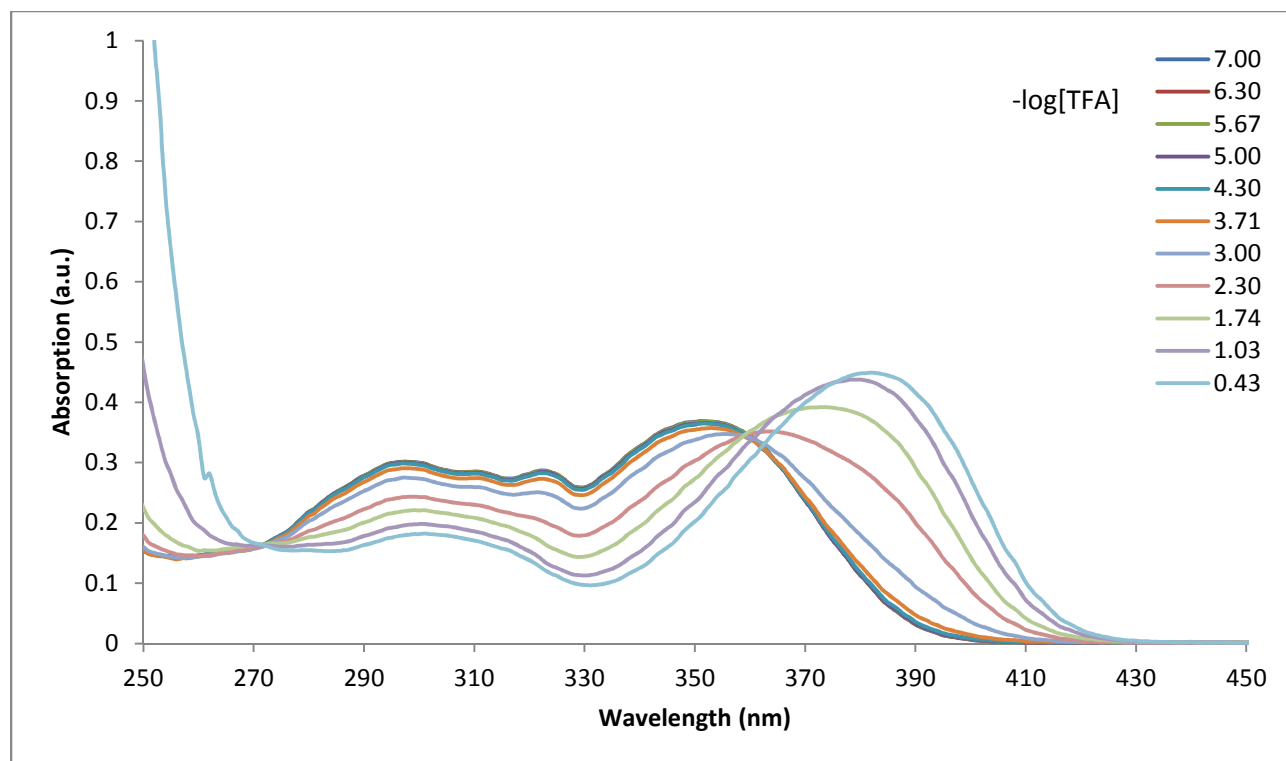

**Figure S4.** UV/Vis absorption titration of compound **8** with TFA.

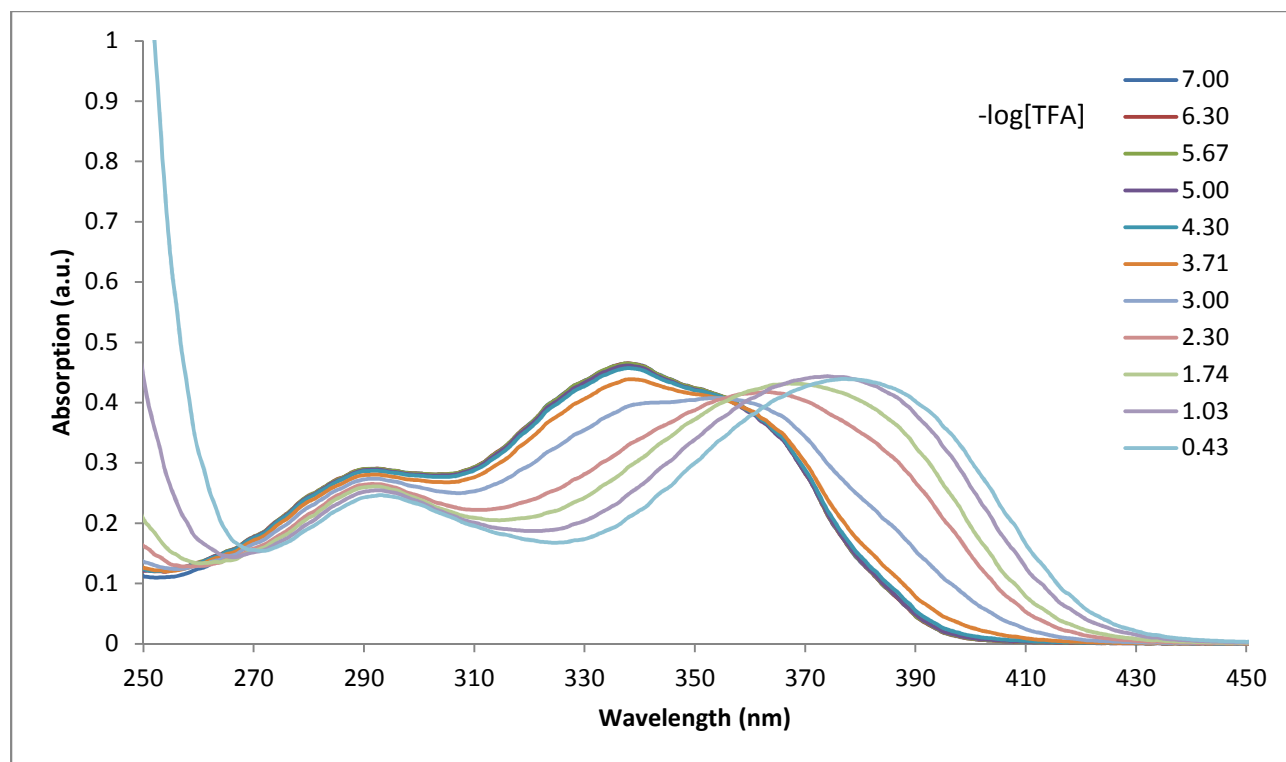

**Figure S5.** UV/Vis absorption titration of compound **9** with TFA.

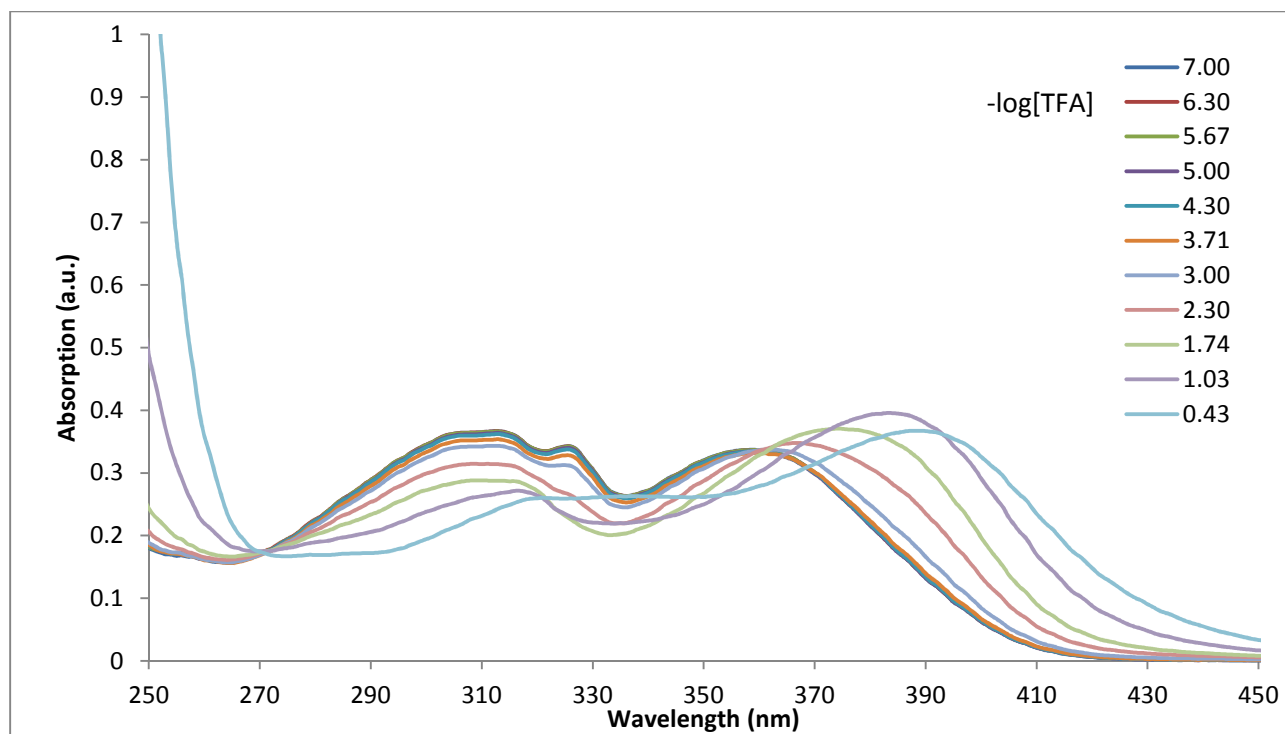

**Figure S6.** UV/Vis absorption titration of compound **10** with TFA.

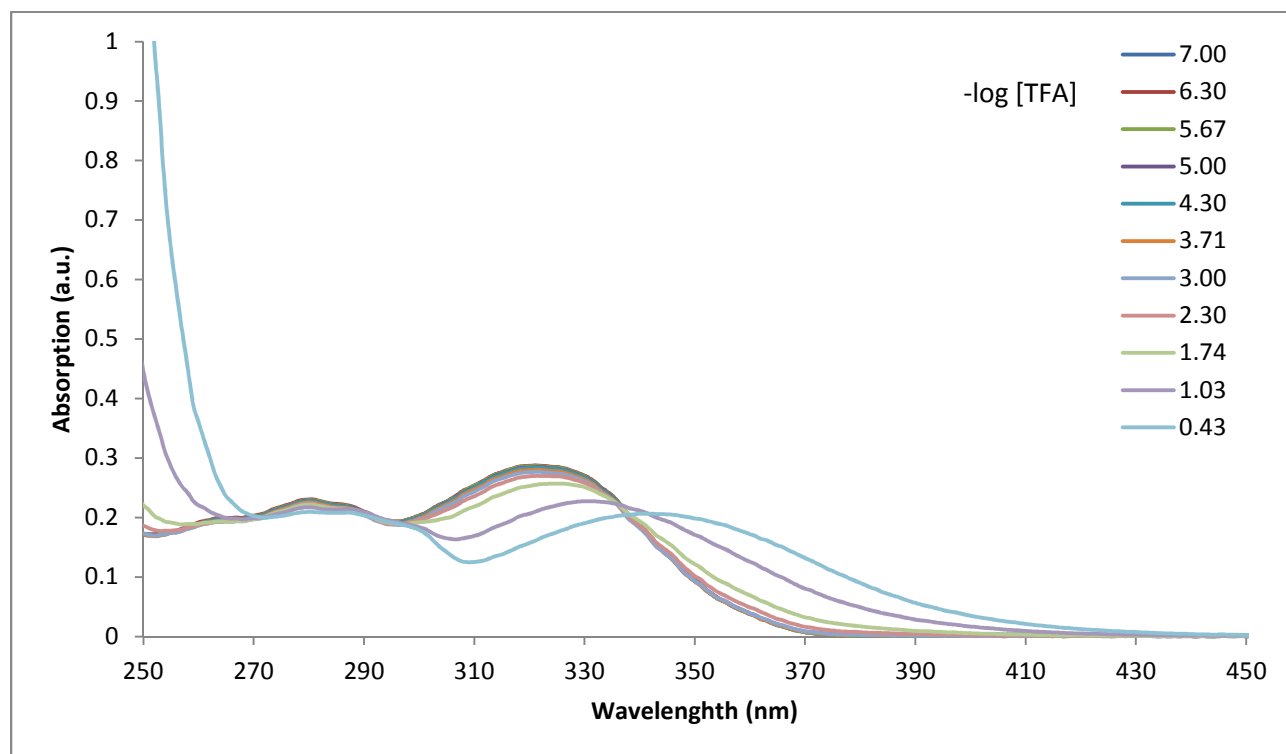

**Figure S7.** UV/Vis absorption titration of compound **11** with TFA.

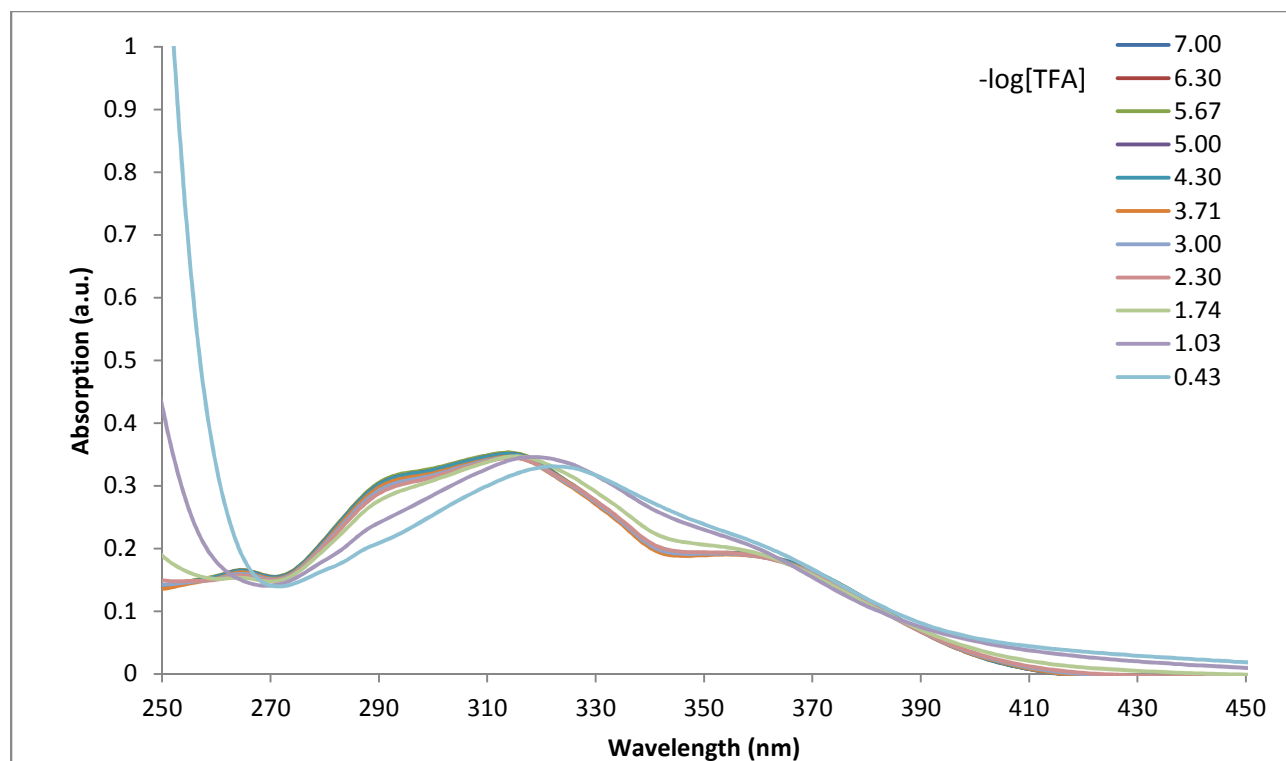

**Figure S8.** UV/Vis absorption titration of compound **12** with TFA.

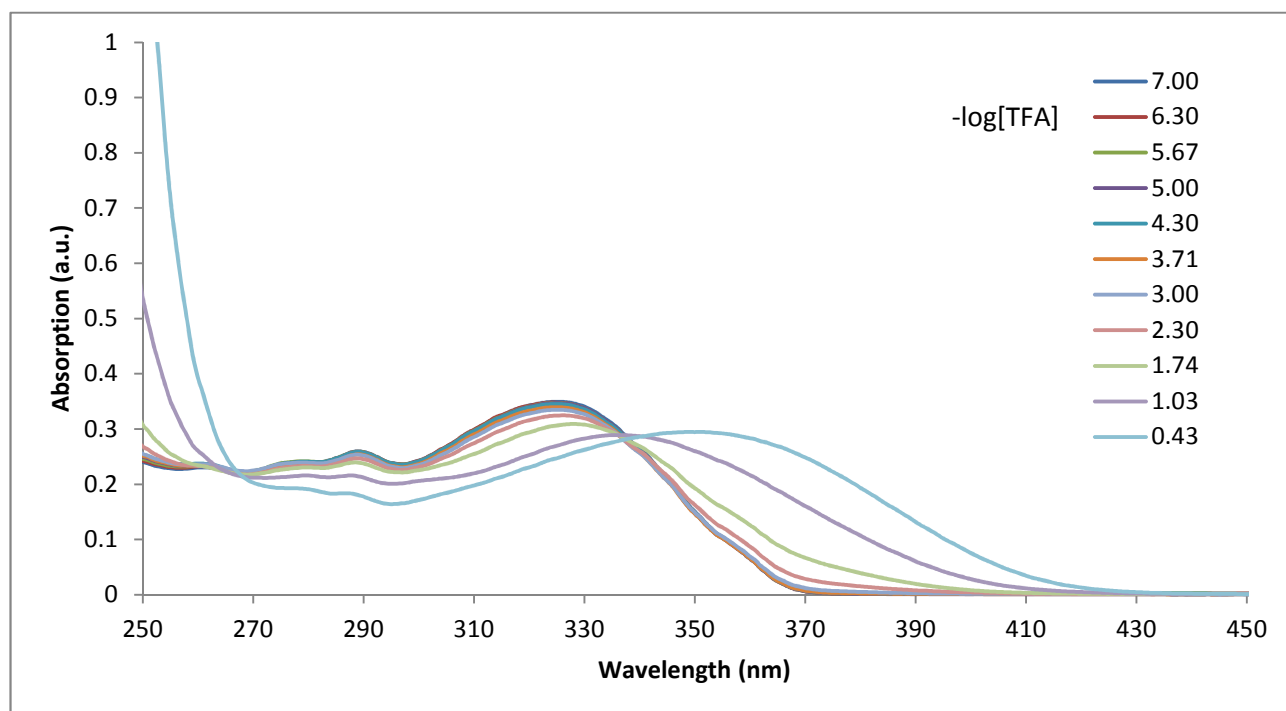

**Figure S9.** UV/Vis absorption titration of compound **13** with TFA.

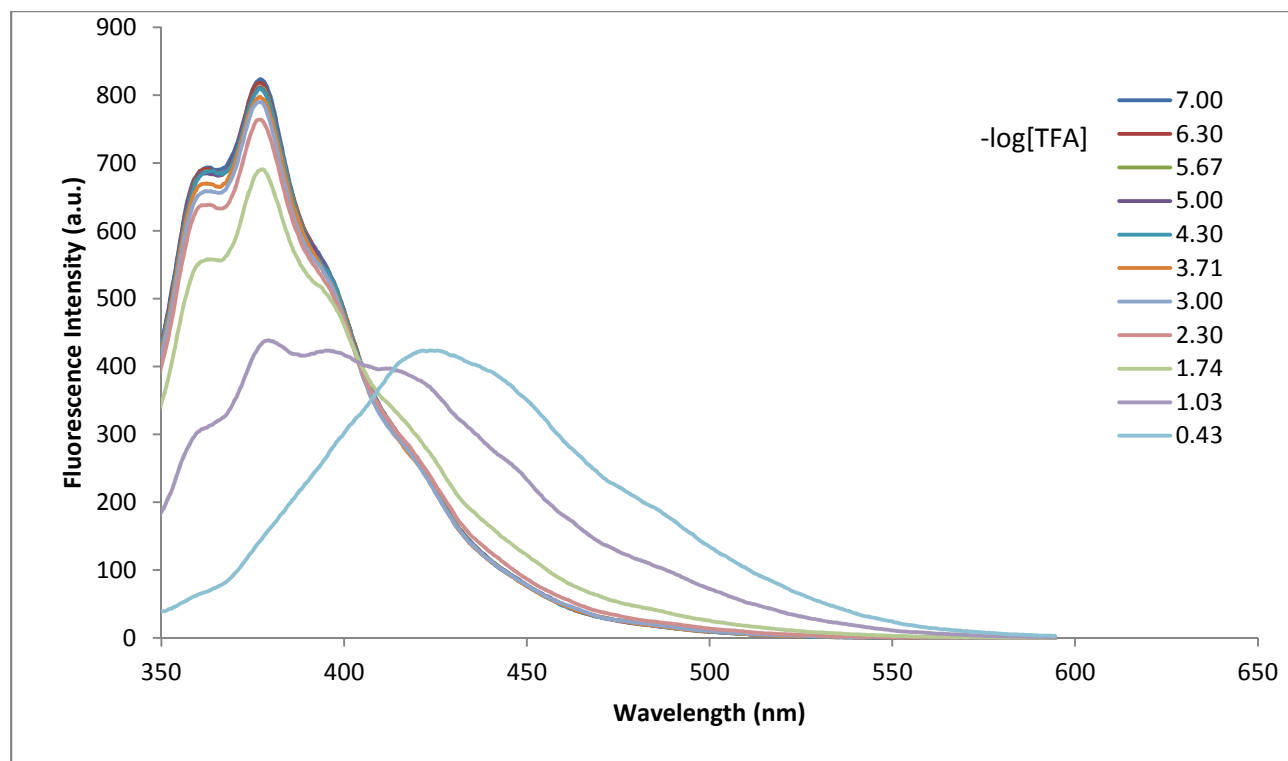

**Figure S10.** Fluorescence emission titration of compound **5** with TFA ( $\lambda_{\text{excitation}} = 313 \text{ nm}$ ).

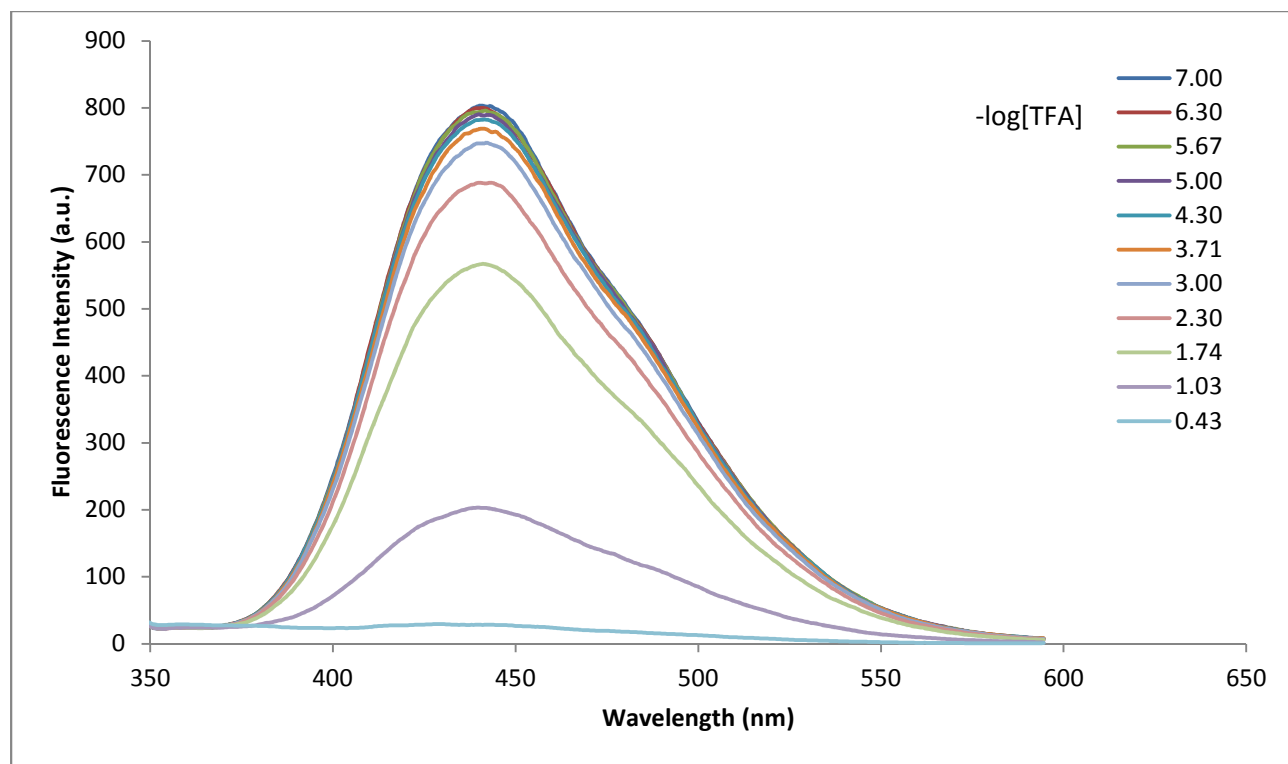

**Figure S11.** Fluorescence emission titration of compound **6** with TFA ( $\lambda_{\text{excitation}} = 313 \text{ nm}$ ).

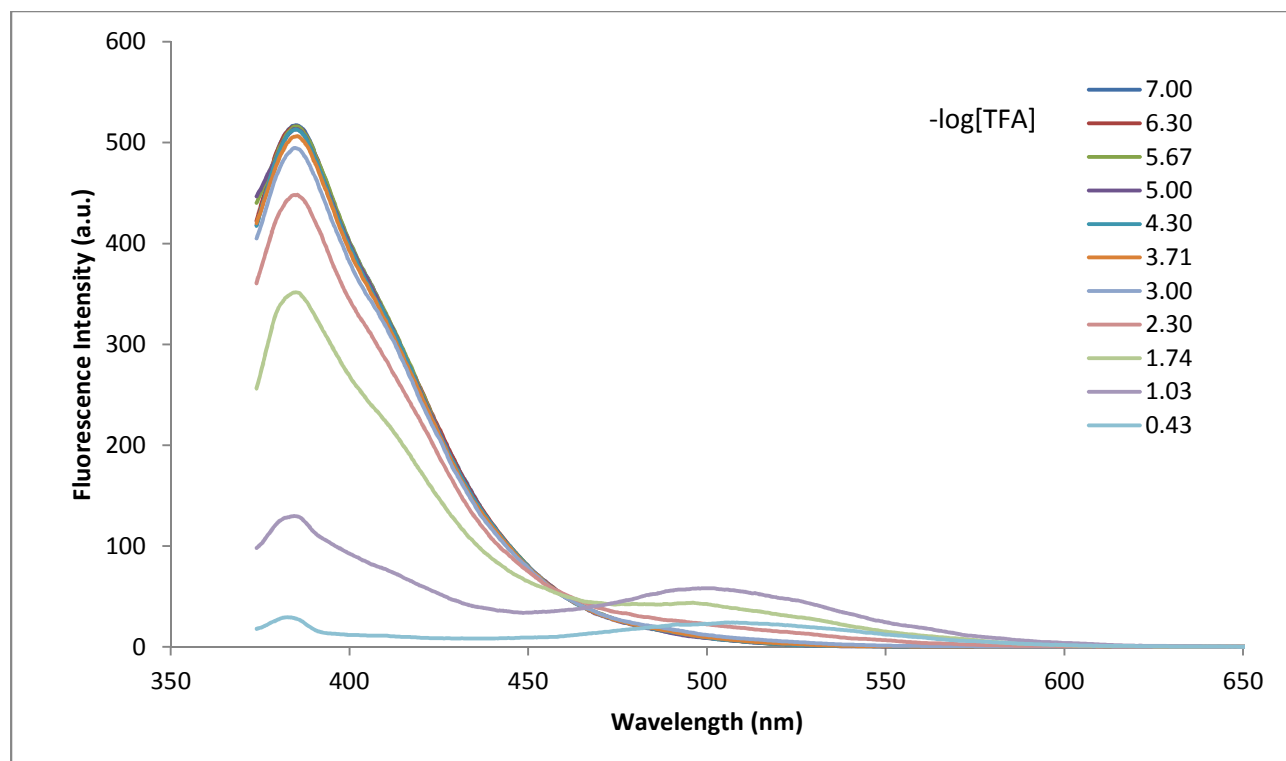

**Figure S12.** Fluorescence emission titration of compound **7** with TFA ( $\lambda_{\text{excitation}} = 344 \text{ nm}$ ).

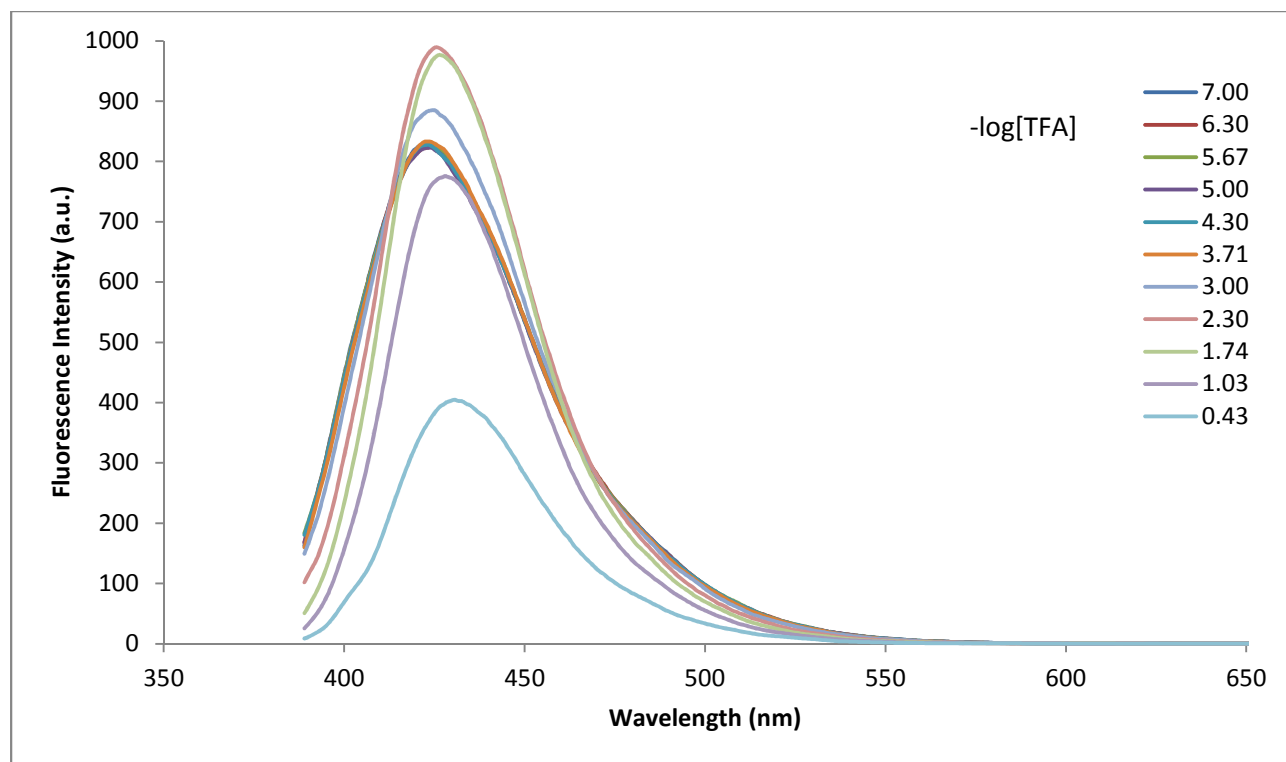

**Figure S13.** Fluorescence emission titration of compound **8** with TFA ( $\lambda_{\text{excitation}} = 359 \text{ nm}$ ).

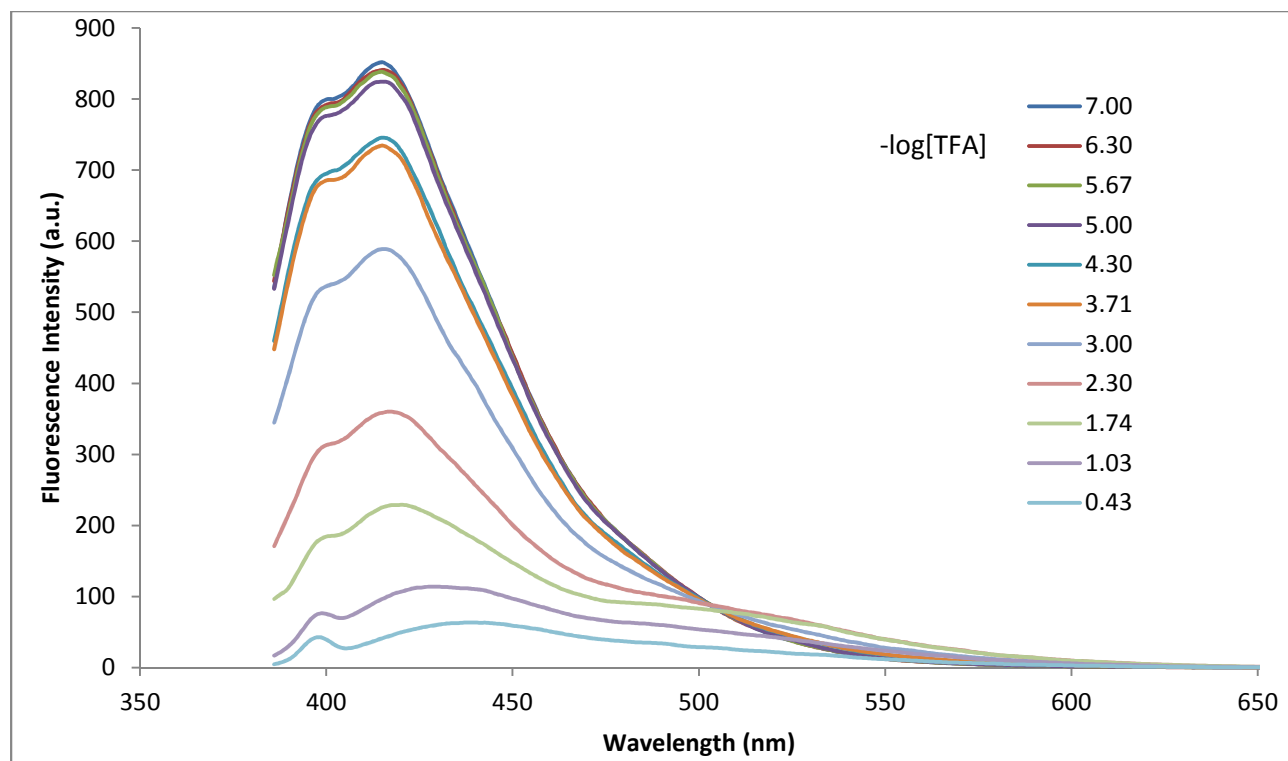

**Figure S14.** Fluorescence emission titration of compound **9** with TFA ( $\lambda_{\text{excitation}} = 356$  nm).

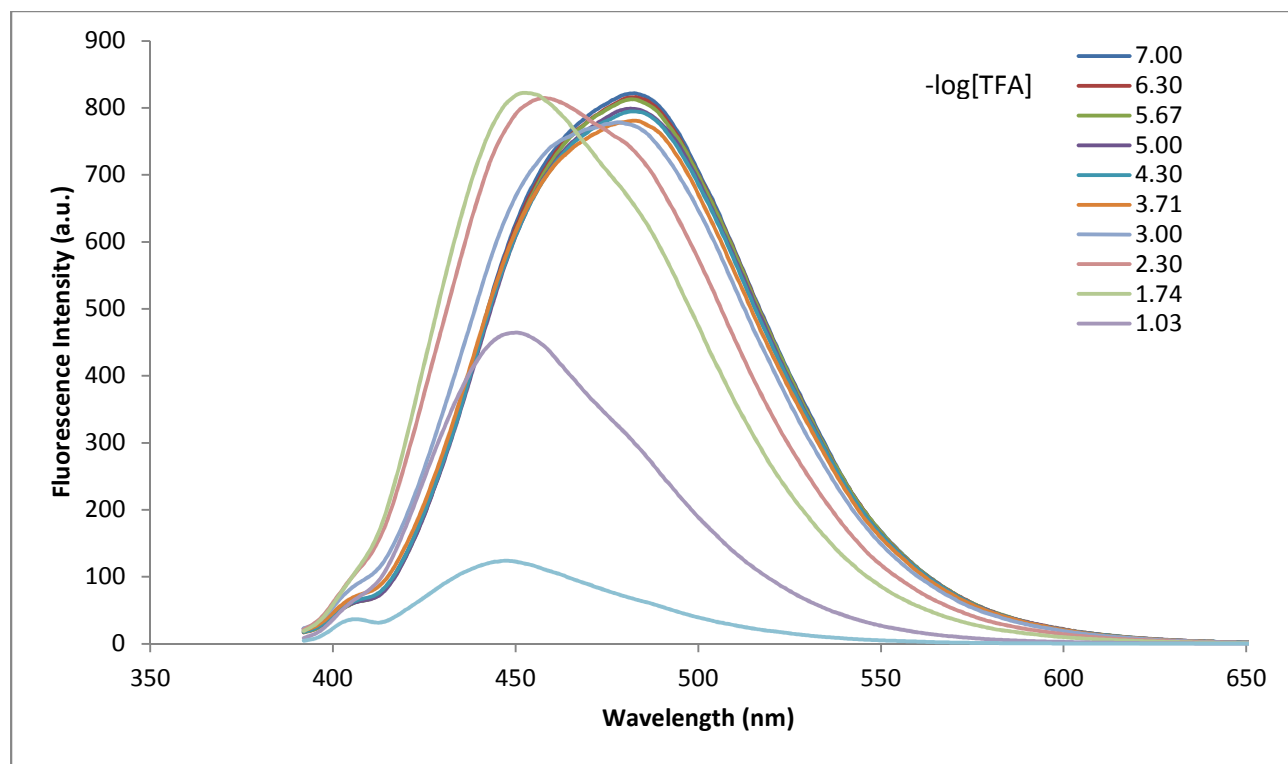

**Figure S15.** Fluorescence emission titration of compound **10** with TFA ( $\lambda_{\text{excitation}} = 362$  nm).

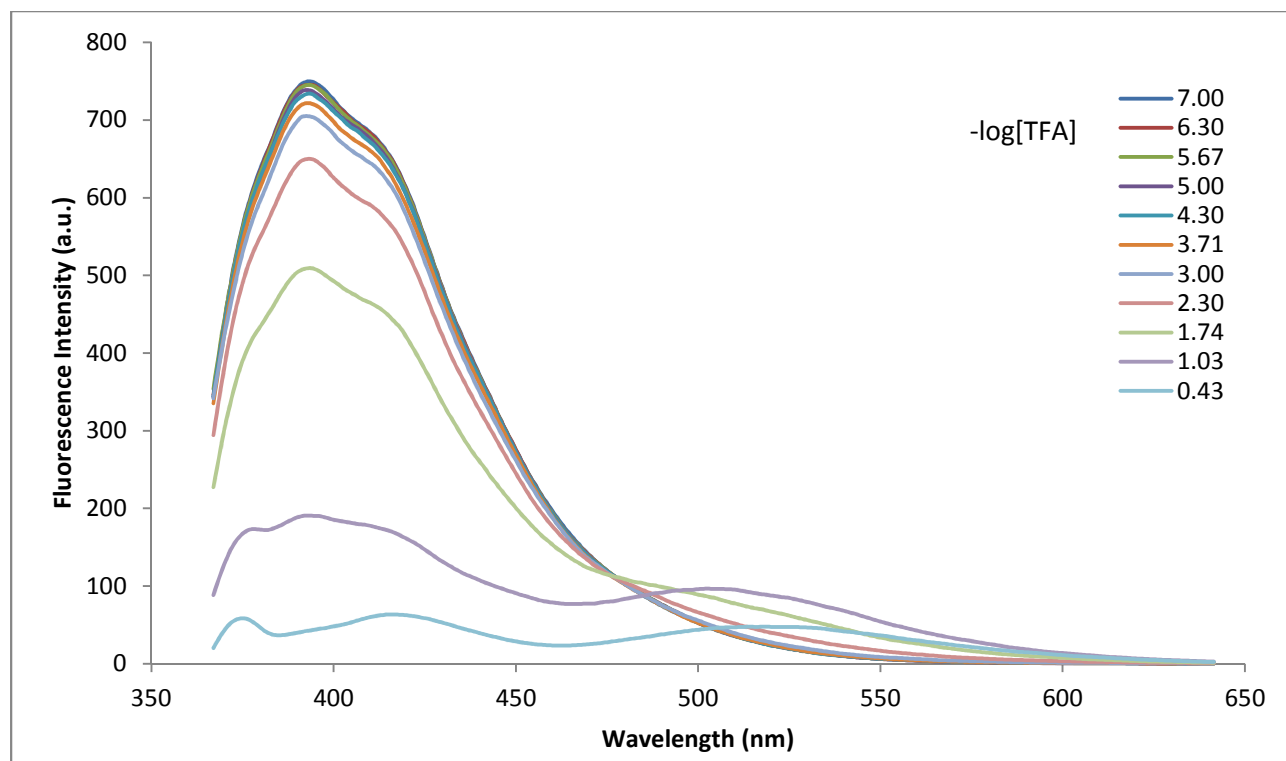

**Figure S16.** Fluorescence emission titration of compound **11** with TFA ( $\lambda_{\text{excitation}} = 337 \text{ nm}$ ).

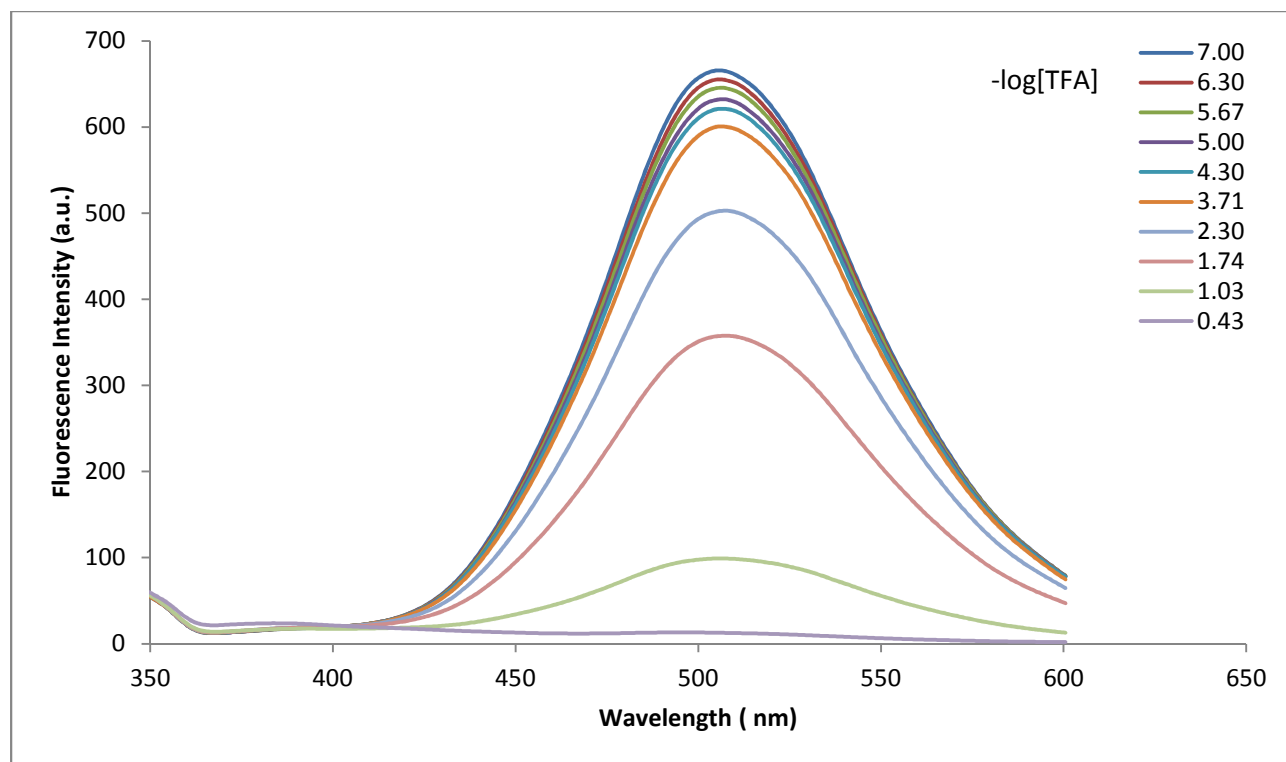

**Figure S17.** Fluorescence emission titration of compound **12** with TFA ( $\lambda_{\text{excitation}} = 317 \text{ nm}$ ).

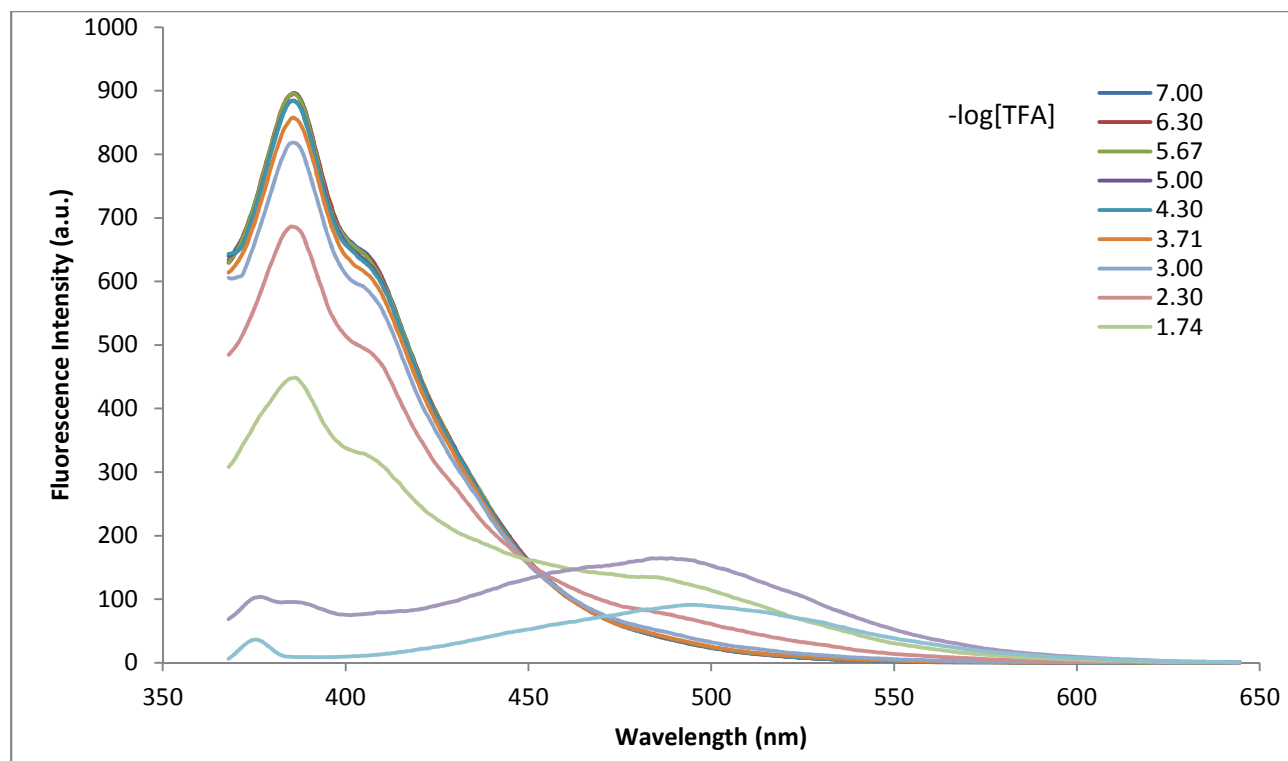

**Figure S18.** Fluorescence emission titration of compound **13** with TFA ( $\lambda_{\text{excitation}} = 338$  nm).

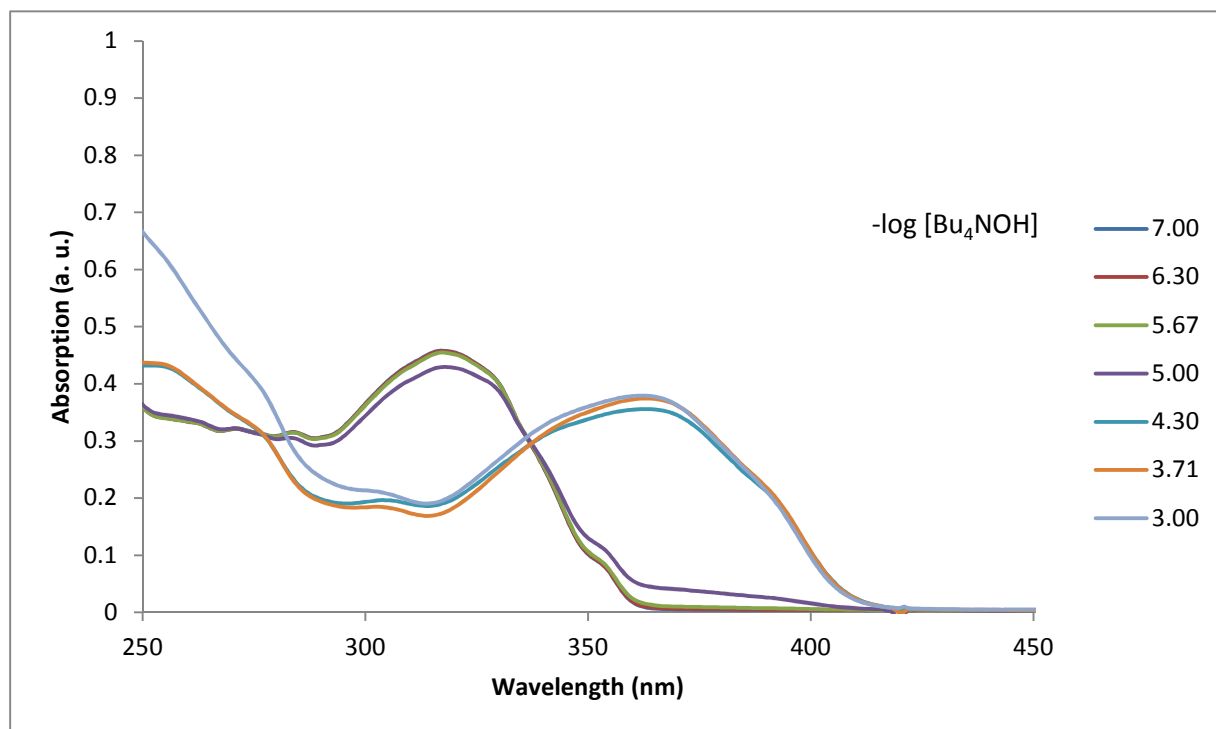

**Figure S19.** UV/Vis absorption titration of compound **5** with  $\text{Bu}_4\text{NOH}$ .



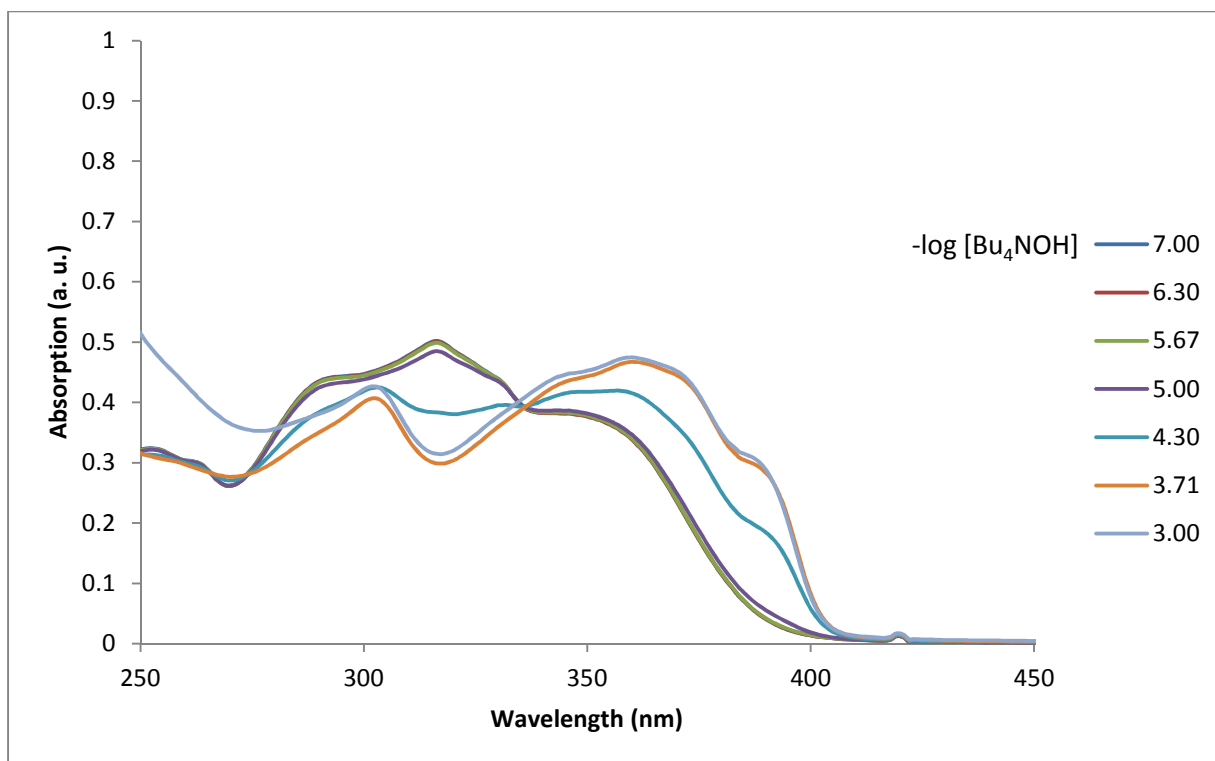

**Figure S20.** UV/Vis absorption titration of compound 6 with Bu<sub>4</sub>NOH.

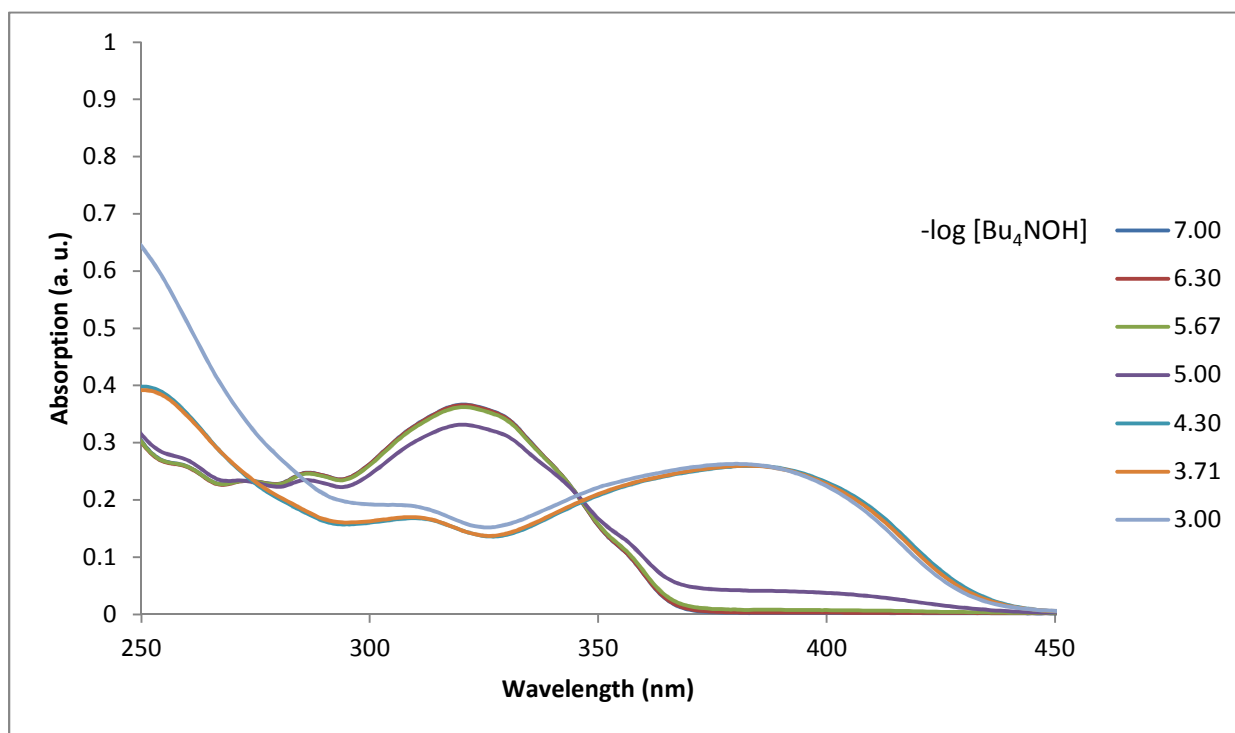

**Figure S21.** UV/Vis absorption titration of compound 7 with Bu<sub>4</sub>NOH.

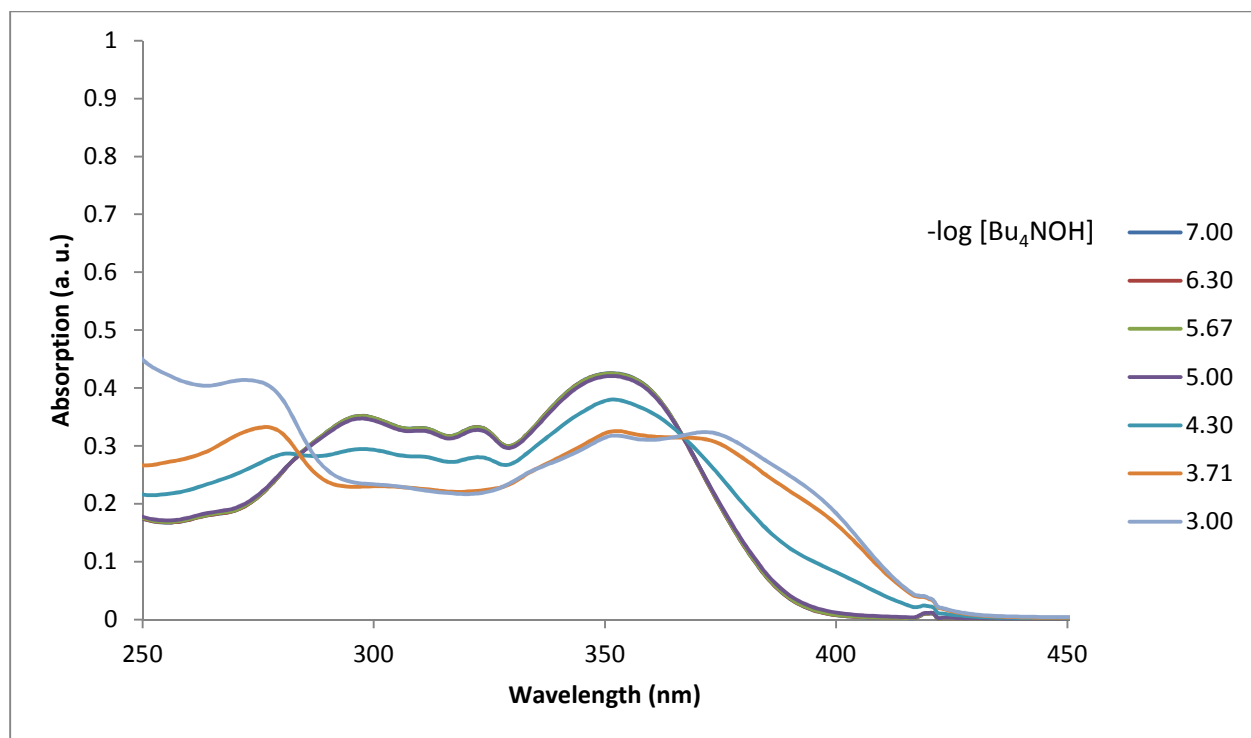

**Figure S22.** UV/Vis absorption titration of compound **8** with  $\text{Bu}_4\text{NOH}$ .

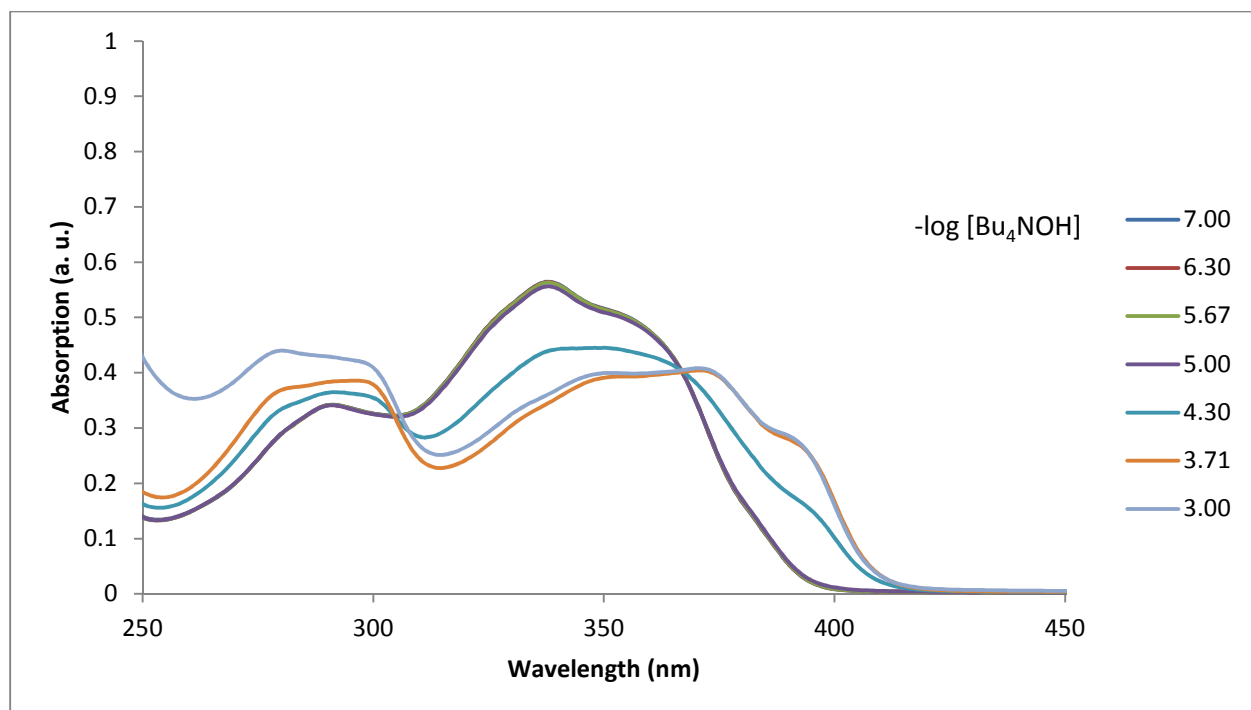

**Figure S23.** UV/Vis absorption titration of compound **9** with  $\text{Bu}_4\text{NOH}$ .

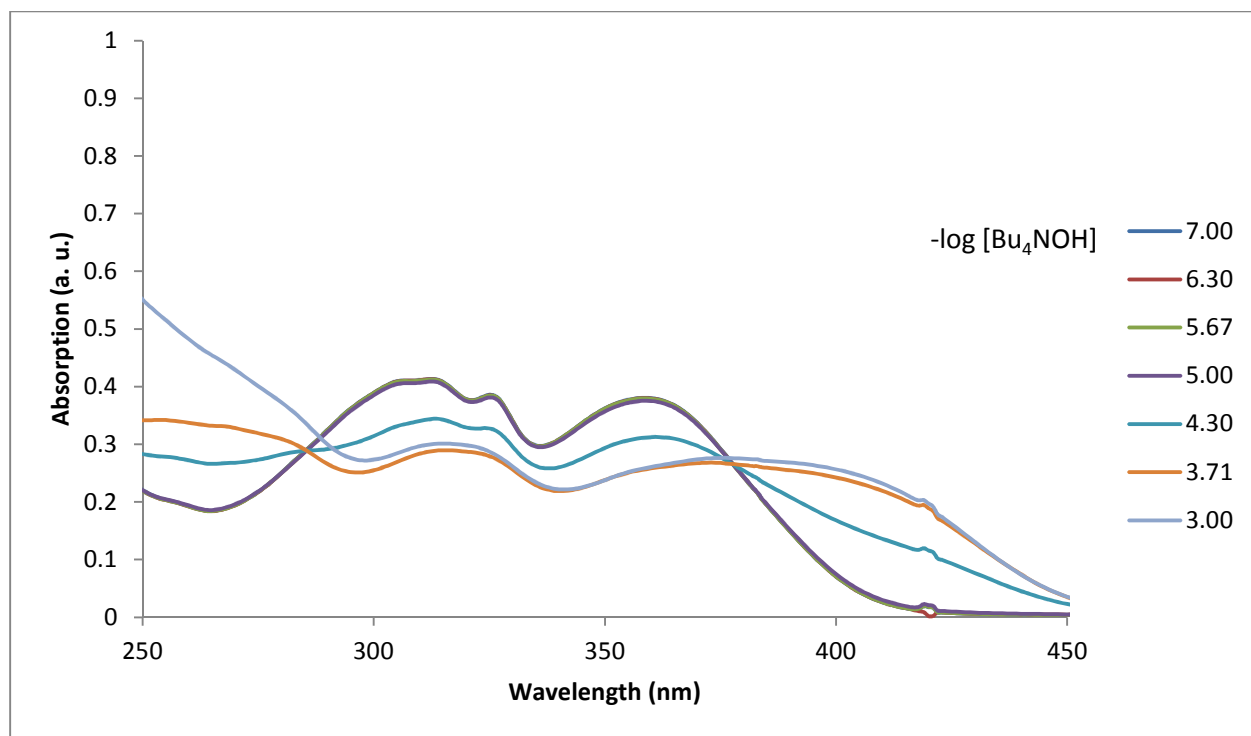

**Figure S24.** UV/Vis absorption titration of compound **10** with Bu<sub>4</sub>NOH.

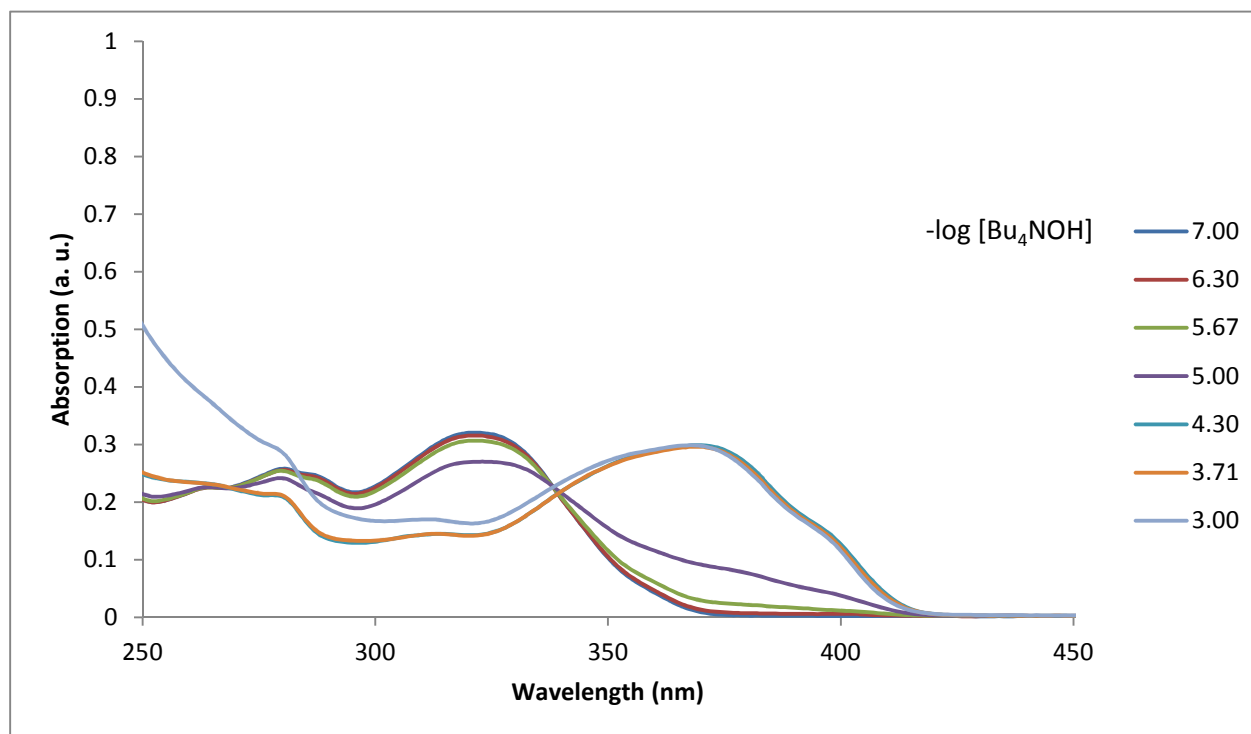

**Figure S25.** UV/Vis absorption titration of compound **11** with Bu<sub>4</sub>NOH.

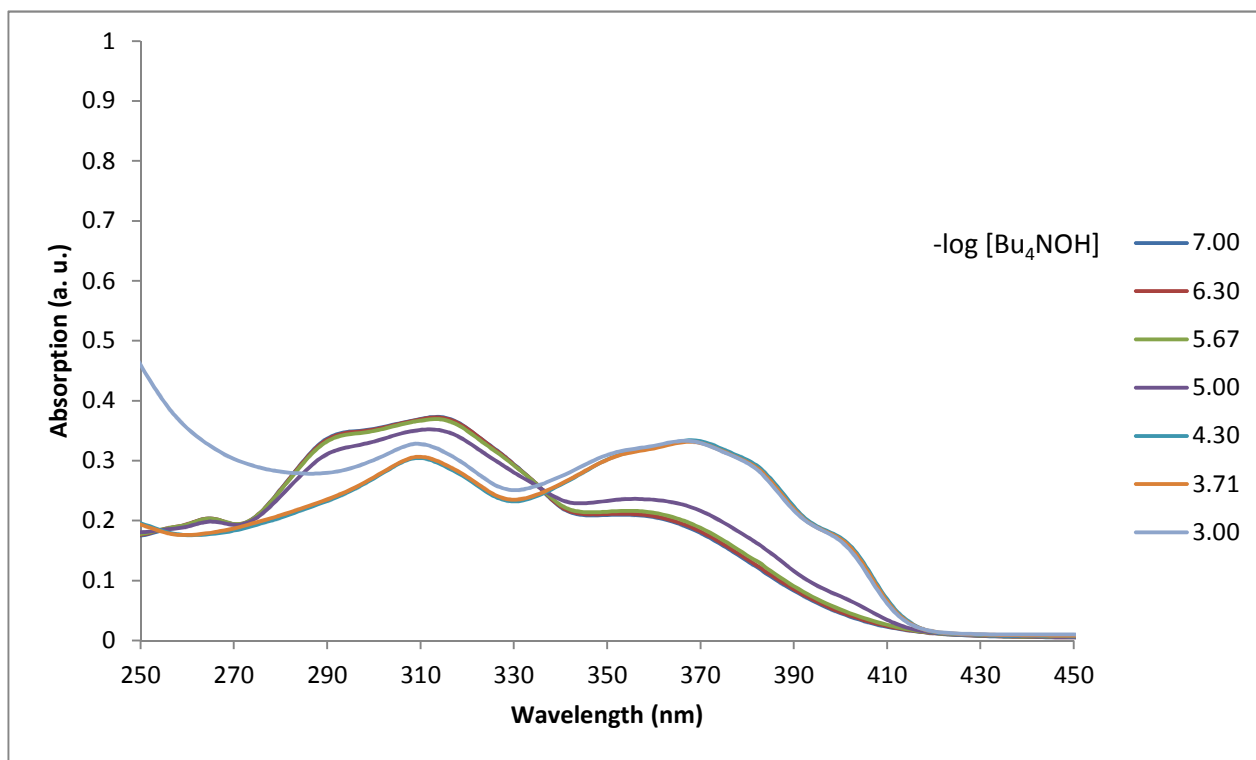

**Figure S26.** UV/Vis absorption titration of compound **12** with Bu<sub>4</sub>NOH.

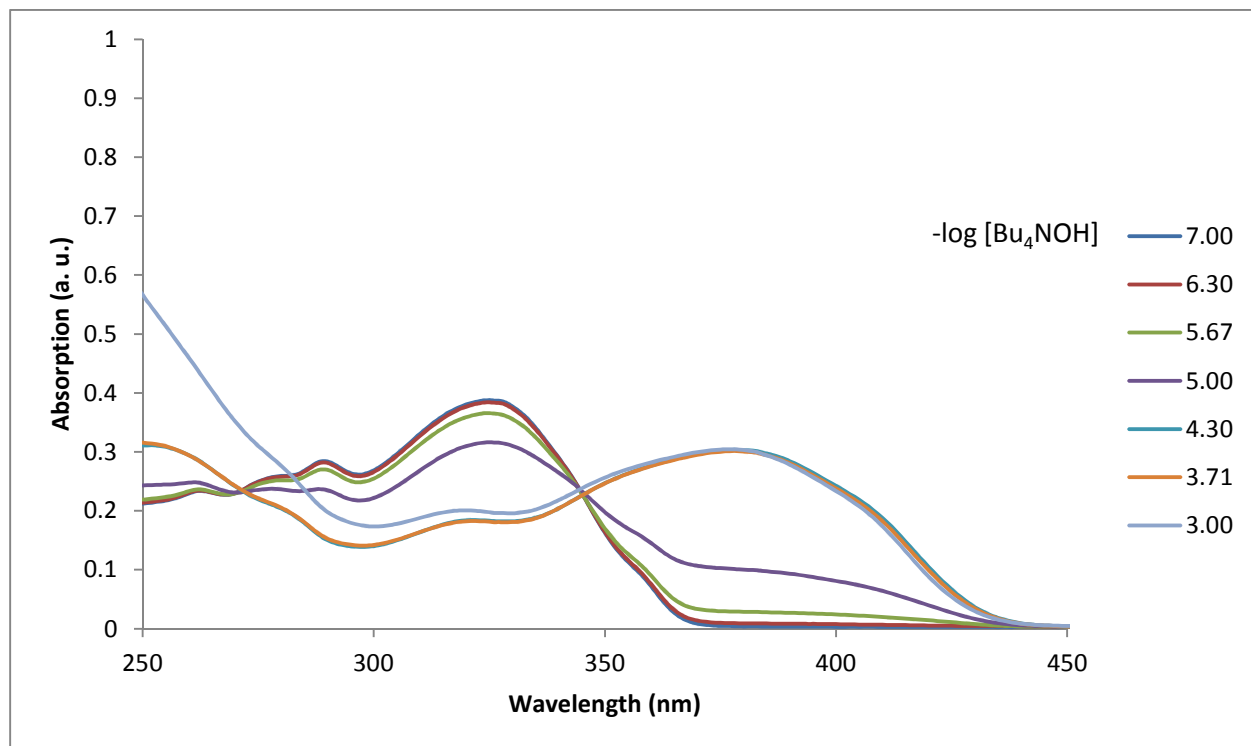

**Figure S27.** UV/Vis absorption titration of compound **13** with Bu<sub>4</sub>NOH.

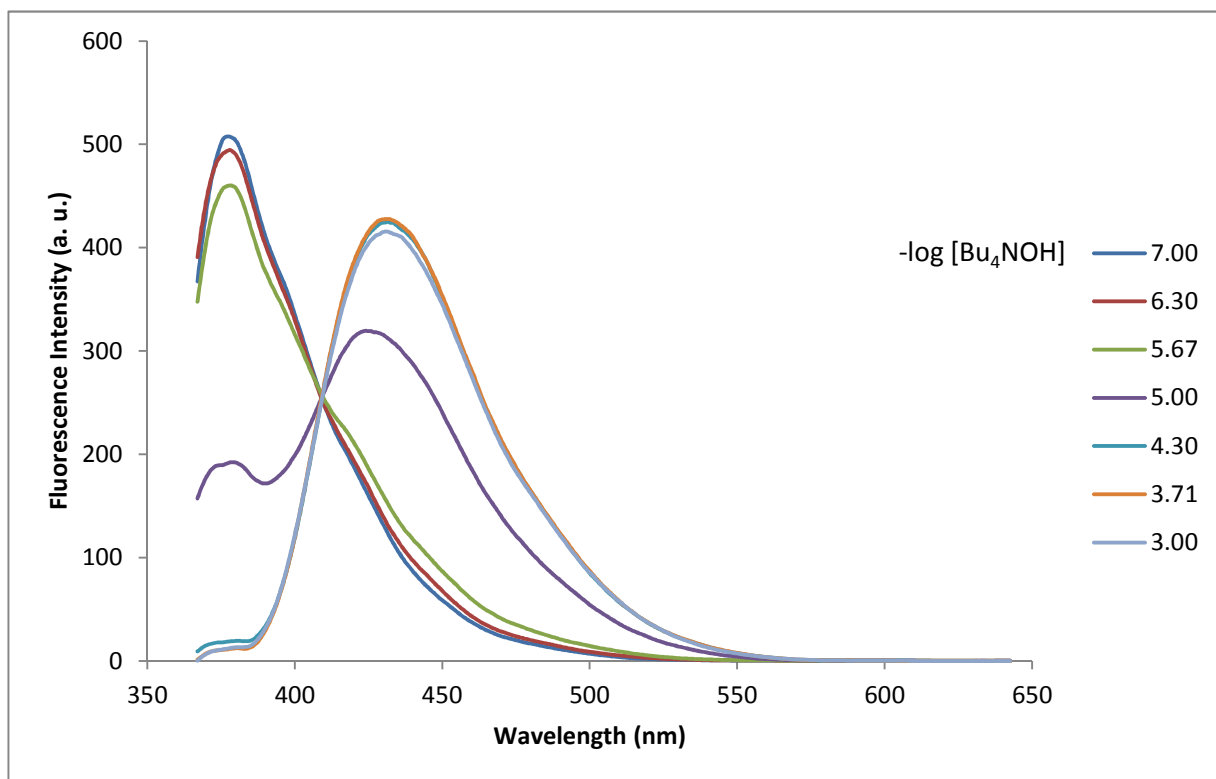

**Figure S28.** Fluorescence emission titration of compound **5** with Bu<sub>4</sub>NOH ( $\lambda_{\text{excitation}} = 337$  nm).

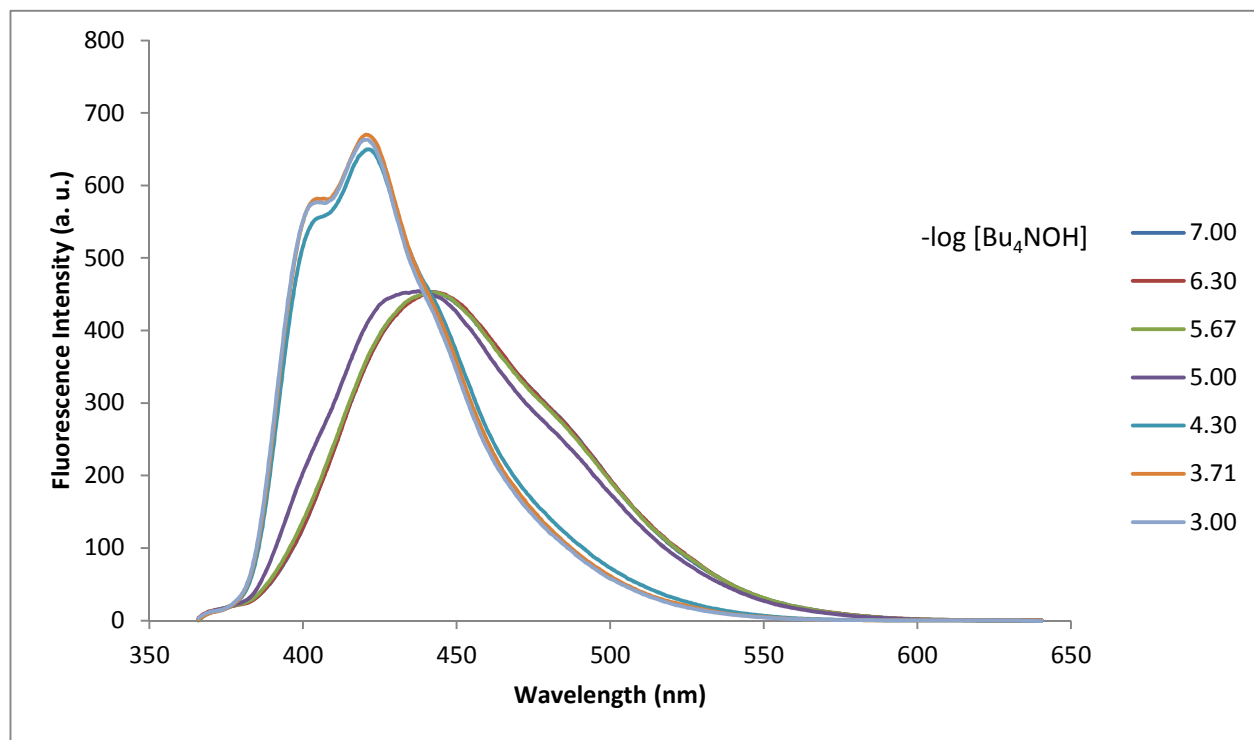

**Figure S29.** Fluorescence emission titration of compound **6** with Bu<sub>4</sub>NOH ( $\lambda_{\text{excitation}} = 336$  nm).

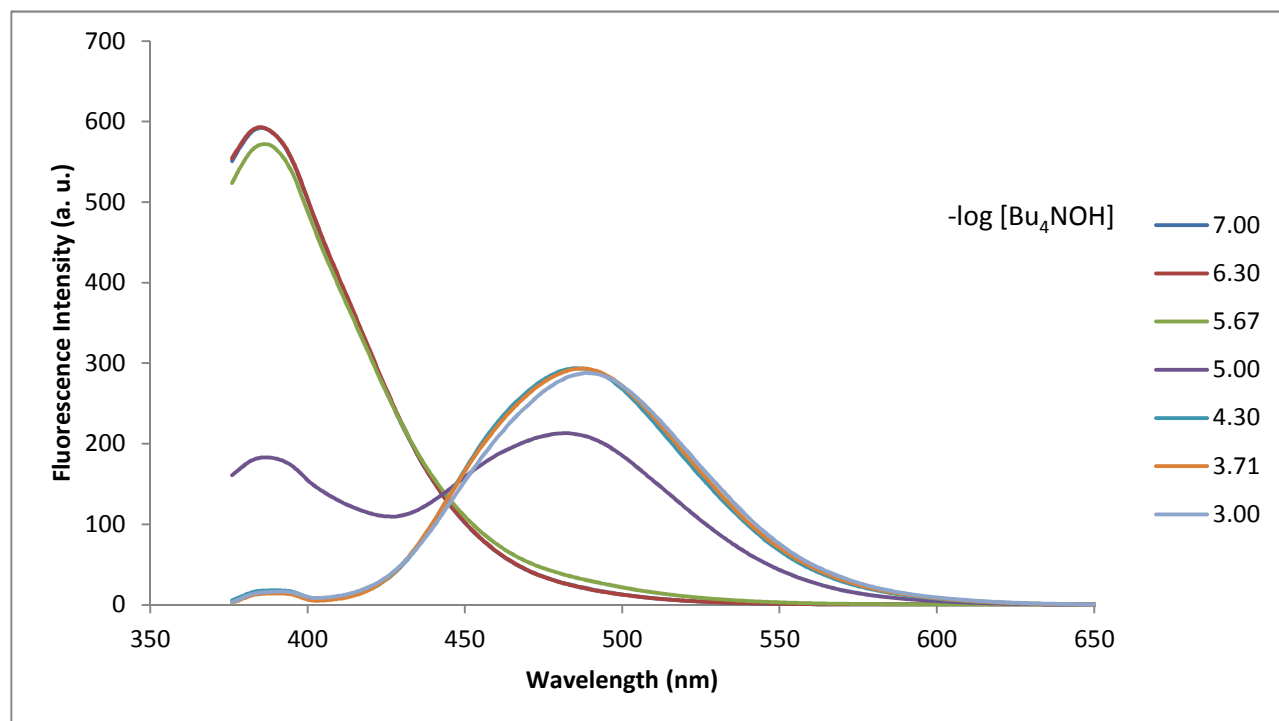

**Figure S30.** Fluorescence emission titration of compound **7** with Bu<sub>4</sub>NOH ( $\lambda_{\text{excitation}} = 346$  nm).

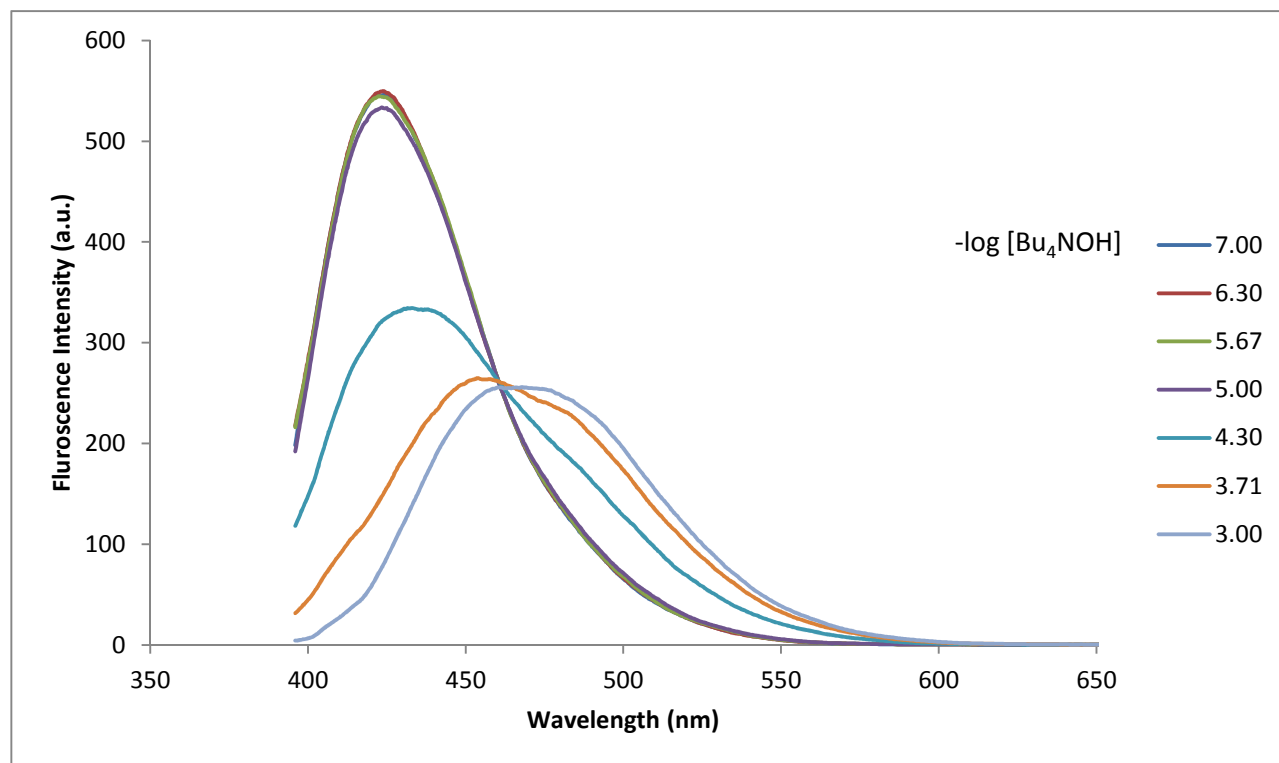

**Figure S31.** Fluorescence emission titration of compound **8** with Bu<sub>4</sub>NOH ( $\lambda_{\text{excitation}} = 366$  nm).

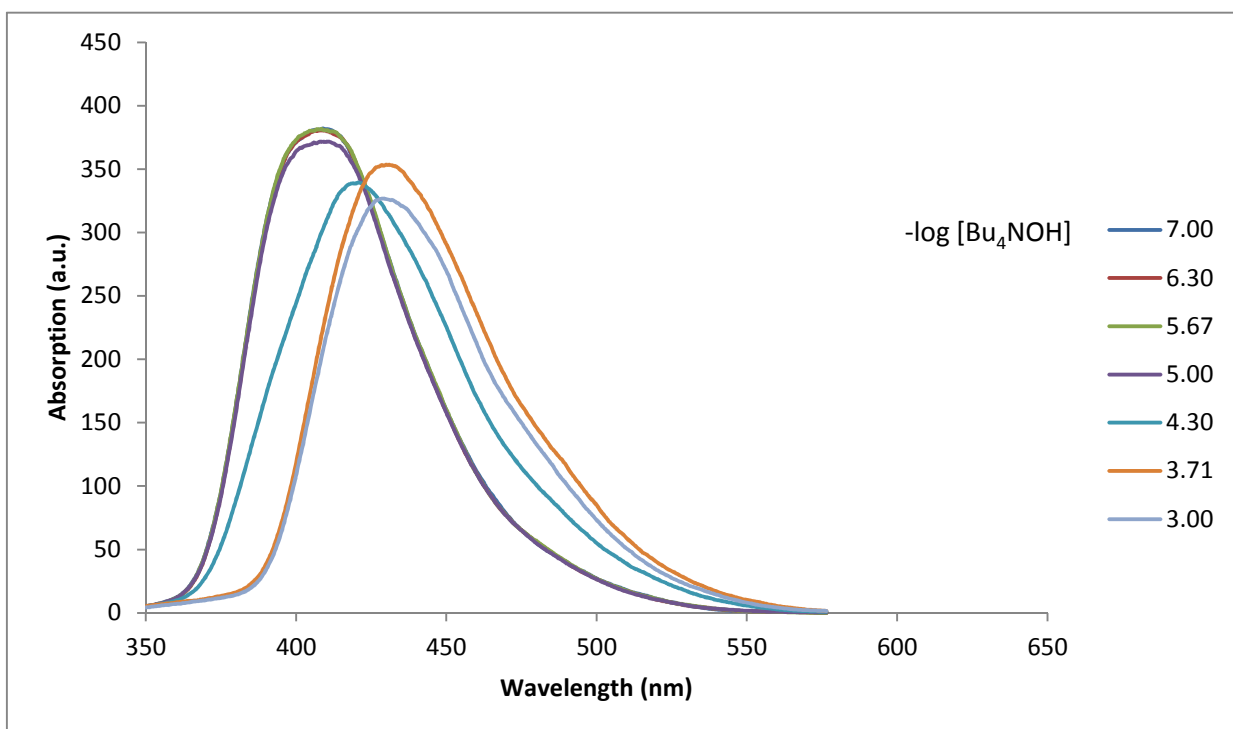

**Figure S32.** Fluorescence emission titration of compound **9** with  $\text{Bu}_4\text{NOH}$  ( $\lambda_{\text{excitation}} = 304 \text{ nm}$ ).

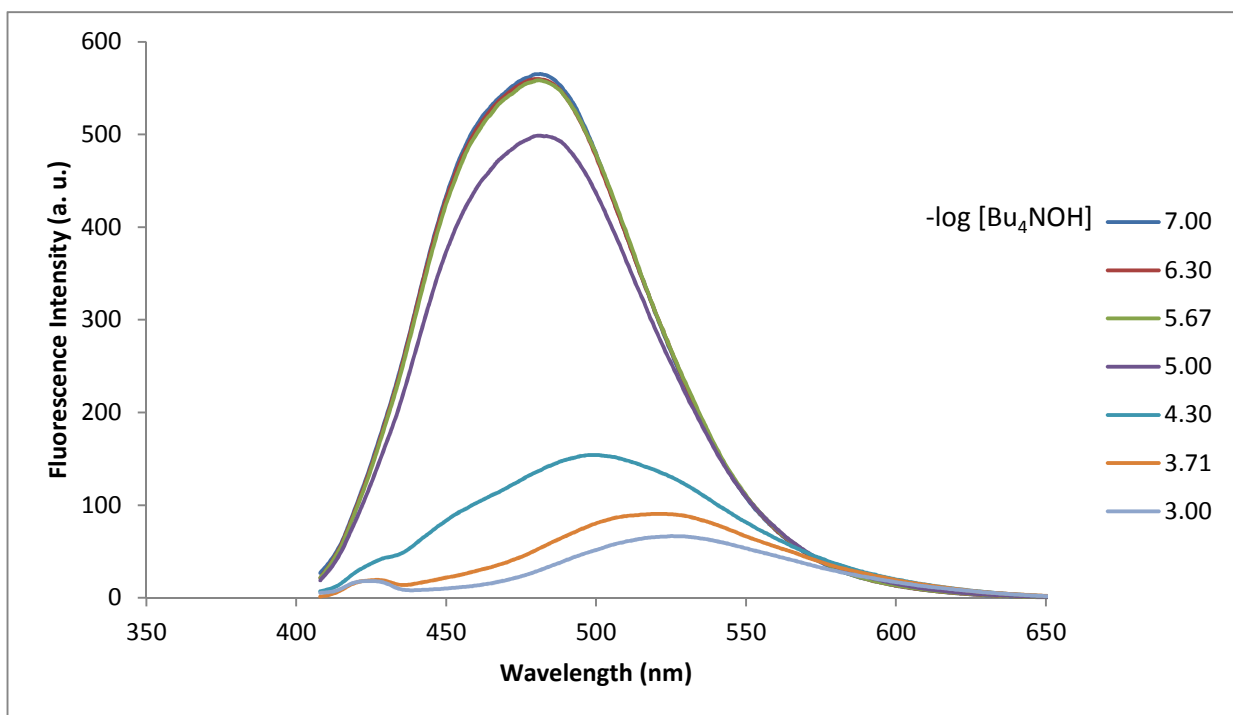

**Figure S33.** Fluorescence emission titration of compound **10** with  $\text{Bu}_4\text{NOH}$  ( $\lambda_{\text{excitation}} = 378 \text{ nm}$ ).

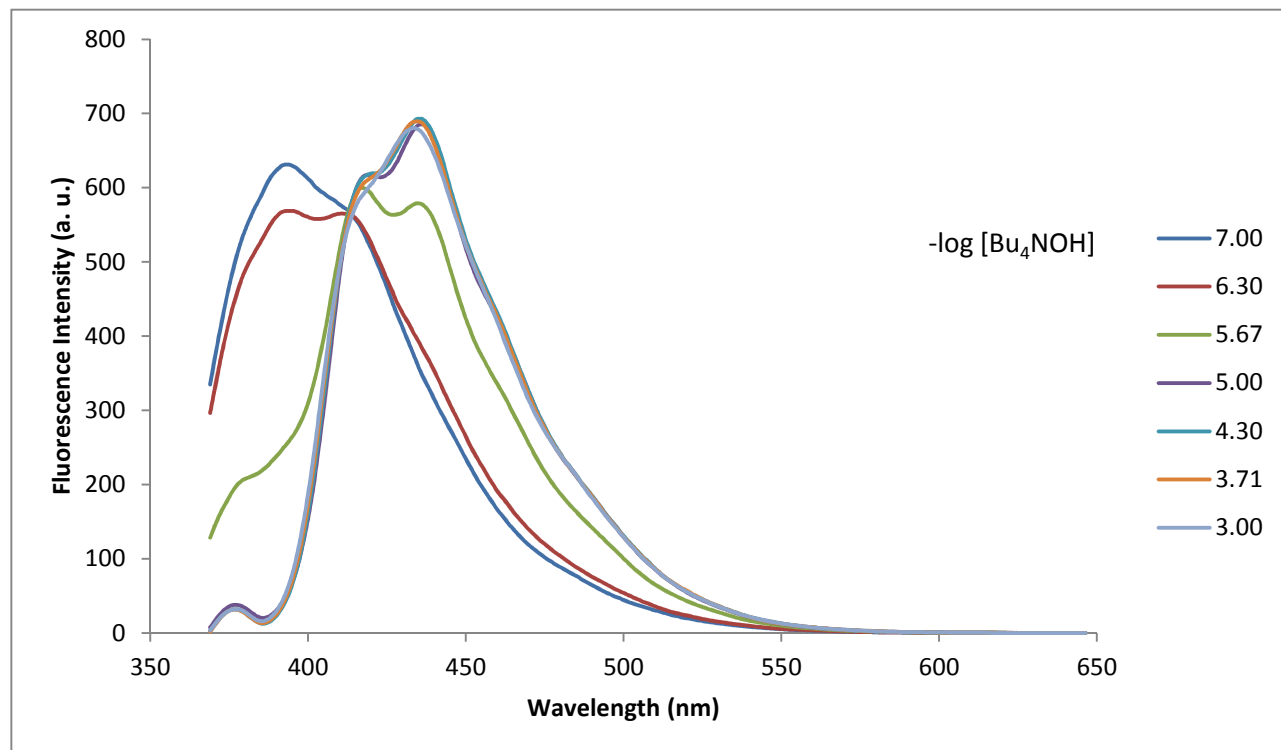

**Figure S34.** Fluorescence emission titration of compound **11** with Bu<sub>4</sub>NOH ( $\lambda_{\text{excitation}} = 339$  nm).

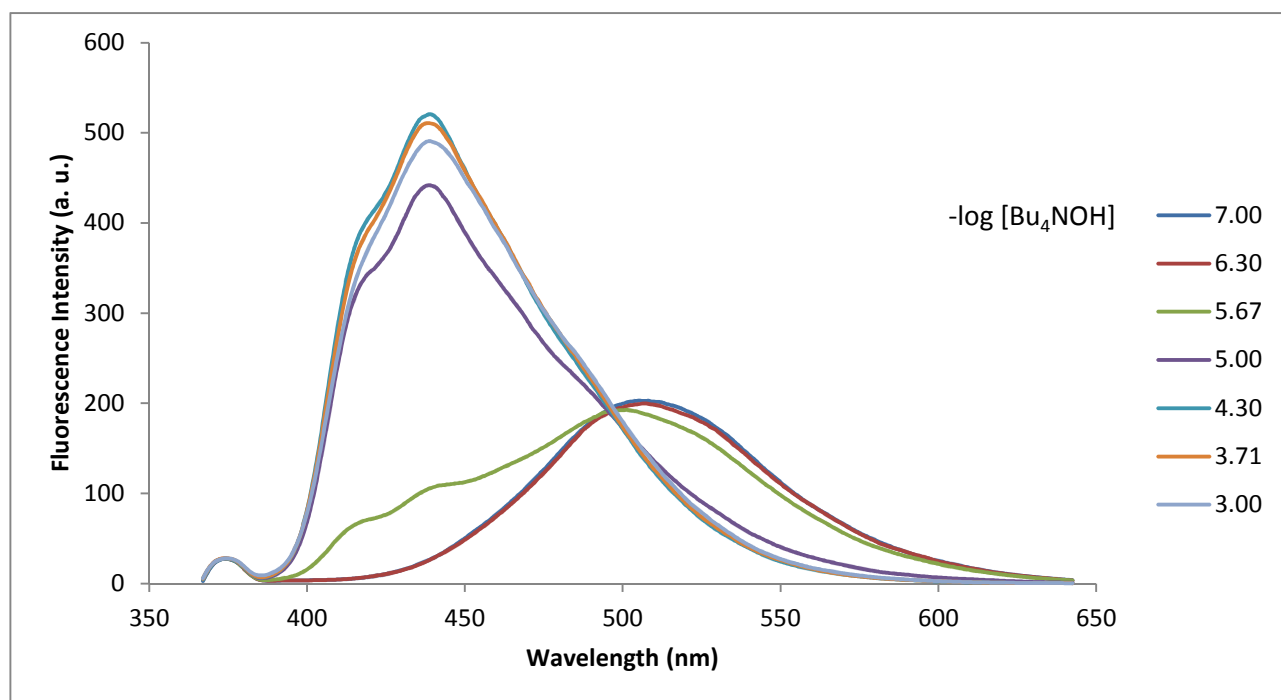

**Figure S35.** Fluorescence emission titration of compound **12** with Bu<sub>4</sub>NOH ( $\lambda_{\text{excitation}} = 337$  nm).



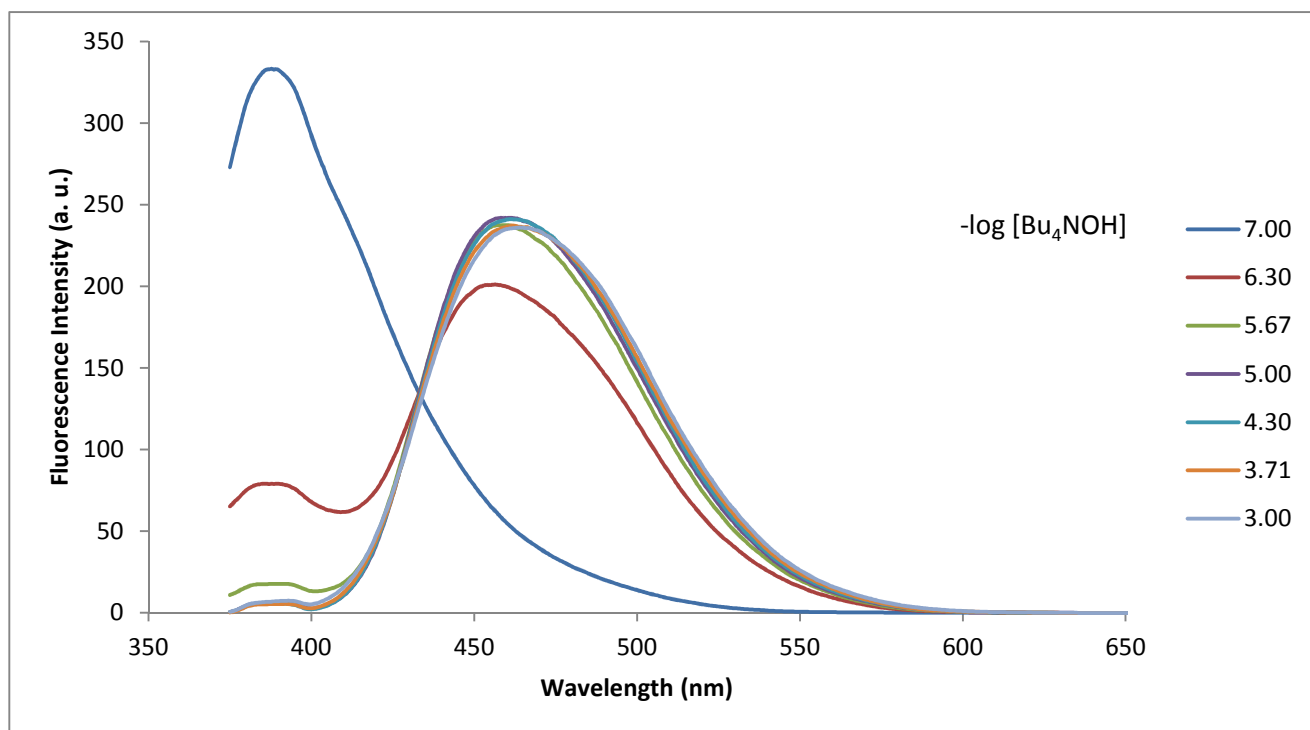

**Figure S36.** Fluorescence emission titration of compound **13** with Bu<sub>4</sub>NOH ( $\lambda_{\text{excitation}} = 345$  nm).

### References

- (1) K. Pilgram, M. Zupan and R. Skiles, *J. Heterocycl. Chem.*, 1970, **7**, 629–633.
- (2) Q. Peng, J. Xu and W. Zheng, *J. Polym. Sci., Part A: Polym. Chem.*, 2009, **47**, 3399–3408.
- (3) R. Wąsik, P. Wińska, J. Poznański and D. Shugar, *J. Phys. Chem. B.*, 2012, **116**, 7259–7268.
- (4) S. Sunder and N. P. Peet, *J. Heterocycl. Chem.*, 1979, **16**, 33–37.
- (5) Y. Abraham, H. Salman, K. Suwinska and Y. Eichen, *Chem. Commun.*, 2011, **47**, 6087–6089.
- (6) J. Lim, T. A. Albright, B. R. Martin and O. Š. Miljanić, *J. Org. Chem.*, 2011, **76**, 10207–10219.
